# Supplementary material for: Does an innovative paper-based health information system (PHISICC) improve data quality and use in primary healthcare? Protocol of a multicountry, cluster randomised controlled trial in sub-Saharan African rural settings
Source: PubMed Central journal article supplement (PMC8323359; doi:10.1136/bmjopen-2021-051823), 2021-07-29
Supplement: bmjopen-2021-051823.draft_revisions.pdf [file bmjopen-2021-051823.draft_revisions.pdf]

# BMJ Open

BMJ Open is committed to open peer review. As part of this commitment we make the peer review history of every article we publish publicly available.

When an article is published we post the peer reviewers' comments and the authors' responses online. We also post the versions of the paper that were used during peer review. These are the versions that the peer review comments apply to.

The versions of the paper that follow are the versions that were submitted during the peer review process. They are not the versions of record or the final published versions. They should not be cited or distributed as the published version of this manuscript.

BMJ Open is an open access journal and the full, final, typeset and author-corrected version of record of the manuscript is available on our site with no access controls, subscription charges or pay-per-view fees (<http://bmjopen.bmj.com>).

If you have any questions on BMJ Open's open peer review process please email [info.bmjopen@bmj.com](mailto:info.bmjopen@bmj.com)

# BMJ Open

## Does an innovative paper-based health information system (PHISICC) improve data quality and use in primary health care? Protocol of a multi-country, cluster randomised controlled trial in Sub-Saharan African rural settings.

|                               |                                                                                                                                                                                                                                                                                                                                                                                                                                                                                                                                                                                                                                                                                                                                                                                                                                                                                                                                                                                                                                                                                                                                                                                                                                                                                                                                                              |
|-------------------------------|--------------------------------------------------------------------------------------------------------------------------------------------------------------------------------------------------------------------------------------------------------------------------------------------------------------------------------------------------------------------------------------------------------------------------------------------------------------------------------------------------------------------------------------------------------------------------------------------------------------------------------------------------------------------------------------------------------------------------------------------------------------------------------------------------------------------------------------------------------------------------------------------------------------------------------------------------------------------------------------------------------------------------------------------------------------------------------------------------------------------------------------------------------------------------------------------------------------------------------------------------------------------------------------------------------------------------------------------------------------|
| Journal:                      | <i>BMJ Open</i>                                                                                                                                                                                                                                                                                                                                                                                                                                                                                                                                                                                                                                                                                                                                                                                                                                                                                                                                                                                                                                                                                                                                                                                                                                                                                                                                              |
| Manuscript ID                 | bmjopen-2021-051823                                                                                                                                                                                                                                                                                                                                                                                                                                                                                                                                                                                                                                                                                                                                                                                                                                                                                                                                                                                                                                                                                                                                                                                                                                                                                                                                          |
| Article Type:                 | Original research                                                                                                                                                                                                                                                                                                                                                                                                                                                                                                                                                                                                                                                                                                                                                                                                                                                                                                                                                                                                                                                                                                                                                                                                                                                                                                                                            |
| Date Submitted by the Author: | 02-Apr-2021                                                                                                                                                                                                                                                                                                                                                                                                                                                                                                                                                                                                                                                                                                                                                                                                                                                                                                                                                                                                                                                                                                                                                                                                                                                                                                                                                  |
| Complete List of Authors:     | <p>Bosch-Capblanch, Xavier; Swiss Tropical and Public Health Institute<br/> Oyo-Ita, Angela; University of Calabar, Department of Community<br/> Medicine<br/> Muloliwa, Artur; Lurio University Faculty of Health Sciences<br/> Yapi, Richard; Centre Suisse de Recherches Scientifiques en Côte<br/> d'Ivoire<br/> Auer, Christian ; Swiss Tropical and Public Health Institute<br/> Samba, Mamadou; Ministère de la Santé et de l'Hygiène Publique<br/> Gajewski, Suzanne; Swiss Tropical and Public Health Institute<br/> Ross, Amanda; Swiss Tropical and Public Health Institute<br/> Krause, L Kendall; Bill &amp; Melinda Gates Foundation<br/> Ekpenyong, Nnette; University of Calabar Teaching Hospital, Department<br/> of Community Medicine<br/> Nwankwo, Ogonna; University of Calabar, Department of Community<br/> Medicine<br/> Njepuome, Anthonia; Swiss Tropical and Public Health Institute<br/> Lee, Sofia; Swiss Tropical and Public Health Institute<br/> Sacarlal, Jahit ; Eduardo Mondlane University, Faculty of Medicine<br/> Madede, Tavares; Universidade Eduardo Mondlane<br/> Berté, Salimata; Centre Suisse de Recherches Scientifiques en Côte<br/> d'Ivoire<br/> Matsinhe, Graça; Ministério da Saúde<br/> Garba, Abdullahi; National Primary Healthcare Development Agency<br/> Brown, David; BCGI LLC / pivot-23.5°</p> |
| Keywords:                     | <p>Human resource management &lt; HEALTH SERVICES ADMINISTRATION &amp;<br/> MANAGEMENT, Organisation of health services &lt; HEALTH SERVICES<br/> ADMINISTRATION &amp; MANAGEMENT, Protocols &amp; guidelines &lt; HEALTH<br/> SERVICES ADMINISTRATION &amp; MANAGEMENT, Quality in health care &lt;<br/> HEALTH SERVICES ADMINISTRATION &amp; MANAGEMENT, STATISTICS &amp;<br/> RESEARCH METHODS</p>                                                                                                                                                                                                                                                                                                                                                                                                                                                                                                                                                                                                                                                                                                                                                                                                                                                                                                                                                        |
|                               |                                                                                                                                                                                                                                                                                                                                                                                                                                                                                                                                                                                                                                                                                                                                                                                                                                                                                                                                                                                                                                                                                                                                                                                                                                                                                                                                                              |

1  
2  
3  
4  
5  
6  
7  
8  
9  
10  
11  
12  
13  
14  
15  
16  
17  
18  
19  
20  
21  
22  
23  
24  
25  
26  
27  
28  
29  
30  
31  
32  
33  
34  
35  
36  
37  
38  
39  
40  
41  
42  
43  
44  
45  
46  
47  
48  
49  
50  
51  
52  
53  
54  
55  
56  
57  
58  
59  
60

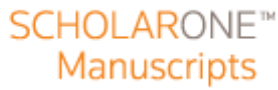

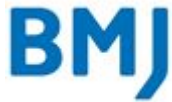

I, the Submitting Author has the right to grant and does grant on behalf of all authors of the Work (as defined in the below author licence), an exclusive licence and/or a non-exclusive licence for contributions from authors who are: i) UK Crown employees; ii) where BMJ has agreed a CC-BY licence shall apply, and/or iii) in accordance with the terms applicable for US Federal Government officers or employees acting as part of their official duties; on a worldwide, perpetual, irrevocable, royalty-free basis to BMJ Publishing Group Ltd ("BMJ") its licensees and where the relevant Journal is co-owned by BMJ to the co-owners of the Journal, to publish the Work in this journal and any other BMJ products and to exploit all rights, as set out in our [licence](#).

The Submitting Author accepts and understands that any supply made under these terms is made by BMJ to the Submitting Author unless you are acting as an employee on behalf of your employer or a postgraduate student of an affiliated institution which is paying any applicable article publishing charge ("APC") for Open Access articles. Where the Submitting Author wishes to make the Work available on an Open Access basis (and intends to pay the relevant APC), the terms of reuse of such Open Access shall be governed by a Creative Commons licence – details of these licences and which [Creative Commons](#) licence will apply to this Work are set out in our licence referred to above.

Other than as permitted in any relevant BMJ Author's Self Archiving Policies, I confirm this Work has not been accepted for publication elsewhere, is not being considered for publication elsewhere and does not duplicate material already published. I confirm all authors consent to publication of this Work and authorise the granting of this licence.

## Title

Does an innovative paper-based health information system (PHISICC) improve data quality and use in primary health care? Protocol of a multi-country, cluster randomised controlled trial in Sub-Saharan African rural settings.

## Authors

- Xavier Bosch-Capblanch: Corresponding author. Swiss Tropical and Public Health Institute. Basel, Switzerland. And University of Basel, Basel, Switzerland. x.bosch@unibas.ch
- Angela Oyo-Ita Department of Community Medicine, University of Calabar, Calabar, Nigeria; oyo\_ita@yahoo.com
- Artur Manuel Muloliwa. Faculty of Health Sciences, Lúrio University, Nampula, Mozambique; muloliwa@yahoo.com.br
- Richard B Yapi. Centre Suisse de Recherches Scientifiques en Côte d'Ivoire, Abidjan, Côte d'Ivoire. And Centre d'Entomologie Médicale et Vétérinaire, Université Alassane Ouattara, Bouaké, Côte d'Ivoire. richard.yapi@csrs.ci
- Christian Auer. Swiss Tropical and Public Health Institute. Basel, Switzerland. And University of Basel, Basel, Switzerland. christian.auer@swisstph.ch
- Mamadou Samba. Ministère de la Santé et de l'Hygiène Publique, Abidjan, Côte d'Ivoire. And Université Félix Houphouët Boigny, Abidjan, Côte d'Ivoire. samba.mamadou@gmail.com
- Suzanne Gajewski. Swiss Tropical and Public Health Institute. Basel, Switzerland. And University of Basel, Basel, Switzerland. suzanne.gajewski@swisstph.ch.
- Amanda Ross. Swiss Tropical and Public Health Institute. Basel, Switzerland. And University of Basel, Basel, Switzerland. amanda.ross@swisstph.ch
- L Kendall Krause. Bill & Melinda Gates Foundation, Seattle, USA. Kendall.Krause@gatesfoundation.org
- Nnette Ekpenyong. Department of Community Medicine, University of Calabar Teaching Hospital, Calabar, Nigeria. And Department of Community Medicine University of Calabar, Calabar, Nigeria. nnekon2015@gmail.com
- Ogonna Nwankwo. Swiss Tropical and Public Health Institute, Basel, Switzerland. And University of Basel, Basel, Switzerland. And Health Policy, Management and Economics Firm, Department of Community. Medicine, University of Calabar, Calabar, Nigeria. ogonna.nwankwo@swisstph.ch
- Anthonia Ngozi Njebuome. Swiss Tropical and Public Health Institute, Abuja, Nigeria. ngonjep@yahoo.com.
- Sofia Mandjate Lee. Swiss Tropical and Public Health Institute; Manhiça, Mozambique. sofia\_mandjate@yahoo.com.br.
- Jahit Sacarlal. Faculty of Medicine, Eduardo Mondlane University, Maputo, Mozambique. jahityash2002@gmail.com.
- Tavares Madede. Department of Community Health, Faculty of Medicine, Eduardo Mondlane University, Maputo, Mozambique. tmadede@gmail.com
- Salimata Berté. Centre Suisse de Recherches Scientifiques en Côte d'Ivoire, Abidjan, Côte d'Ivoire. sali.berte@csrs.ci
- Graça Matsinhe. Expanded Program on Immunization, Ministry of Health, Maputo, Mozambique. gmatsinhe@gmail.com.
- Abdullahi Bulama Garba. Director Planning, Research and Statistics, National Primary Health Care. Development Agency, Abuja, Nigeria. ab.garba@nphcda.gov.ng.
- David W Brown. Managing Principal, BCGI LLC / pivot-23.5°, North Carolina, USA. david.brown@pivot235.org

## Abstract

### Introduction

Frontline health workers in remote, rural health facilities are the first contact of the formal health sector and are confronted with life-saving clinical and public health decisions. Appropriate health information systems (HIS) support the collection and use of data, thus facilitating decision-making. However, HIS focus on reporting and are unfit to support critical decisions at the peripheral level. Since data tools are paper-based in most primary health care settings, we have produced an innovative paper-based HIS (PHISICC), embracing all health care areas in primary health care, using a Human Centred Design, co-creation approach. The PHISICC tools aid decision-making and include recording and reporting. We are carrying out a cluster-randomised controlled trial in three African countries to assess the effects of PHISICC compared with the current systems, on data use and quality, quality of care and health worker perceptions, in remote, rural settings.

### Methods

We have selected study areas in rural zones of Côte d'Ivoire, Mozambique and Nigeria. Seventy health facilities in each country have been randomly allocated to using PHISICC tools or to continuing to use the regular HIS tools (35 per arm). We have selected three villages in the catchment area of each health facility to carry out surveys in 10 households each. Outcomes of interest include data quality and use, coverage of health services, health workers perceptions and other process and explanatory variables.

### Discussion

We strive to contribute to producing robust evidence on health systems interventions, affecting people in remote, rural settings where the most vulnerable live. The PHISICC tools focus on decision-making rather than data and are meant to support health workers decisions as well as reporting to the higher levels of the system. Robust evidence on HIS can better find its way to high quality systematic reviews and guidance development to inform policy and practice.

Trial registration: Pan African Clinical Trials Registry - PACTR201904664660639. Registered 01/04/2019, <https://pactr.samrc.ac.za/Search.aspx>.

## Keywords

Decision-making | Health Information Systems | Primary Health Care | Sub-Saharan Africa | Data quality | Quality of care | Human Centred Design

## Article summary

### Strengths and limitations of the study

- This research assesses the effects of paper-based health information systems, which are massively used particularly in remote, rural areas but which seriously neglected in research.
- The paper-based interventions have been developed using a human-centred design approach, with frontline health workers and designers driving the co-creation process.
- Despite the complexity of health systems interventions like this one, we have applied robust experimental methods, together with qualitative research, to assess and understand the effects of the paper-based intervention. Robust evidence on health systems is more likely to gain the credibility of policy-makers and to make it into systematic reviews, guidance development and policy and practice.
- Research targeting frontline health workers in remote, rural areas has to take place where they live and work, which poses serious obstacles in the organisation, management and monitoring of the trials.
- These obstacles, aggravated by the COVID-19 pandemic, have challenged the mobility of the research team, the availability of the intervention in one of the countries and the duration of the trials.

## Introduction

Frontline health workers (HW) in remote, rural health facilities (HF) in many countries are the first contact with the formal health sector of the population and they are confronted with life-saving clinical and public health decisions on a daily basis. Decisions are made by exerting a balanced judgment on the information related to health care events, such as making the correct diagnoses or deciding on which vaccinations a child should receive on a given day. In order to properly handle this information, appropriate data support tools and processes are required, referred to as the health information system (HIS); or Routine HIS or Health Management Information System [1]. In reality, though, HIS are primarily designed to report aggregated health events to the higher tiers of the health systems rather than to inform decision-making at the point of care [2].

Increasing pressure by donors and governments to collect more and more data has aggravated the situation, through the proliferation of data support tools that have overloaded frontline health workers compromising their capacity to deliver good quality of care and to delivery good quality data [3], for higher level decision-making.

Promising 'quick fixes', such as the scale up of digital HIS, are taking a long time to implement and face enormous challenges related to infrastructure, equipment and services necessary to run them. Besides, research evidence on the effects of digital solutions remains patchy and inconsistent, even in high-income country settings, where complaints about computerisation of clinical care have been raised [4,5]. Hence, it is very likely that paper tools will remain a primary, if not unique, data support mechanism particularly in remote, rural HF in many countries.

PHISICC (Paper-based Health Information System in Comprehensive Care) is a multi-year, multi-country, mixed-methods research project that aims at producing and testing an innovative paper-based HIS to improve data quality and use, decision making and health outcomes, at Primary Health Care (PHC). It is being carried out in selected areas within Côte d'Ivoire, Mozambique and Nigeria. The project started in 2015, producing a systematic review on the effects of HIS interventions and a



1  
2  
3 framework synthesis on how HIS are understood in the literature. These were followed by studies to  
4  
5 characterise the existing HIS in the three countries. With these bodies of evidence, we engaged into a  
6  
7 Human Centred Design (HCD) co-creative process with frontline HW to design an innovative HIS  
8  
9 (PHISICC).  
10

11  
12 The impact of the PHISICC HIS on data quality and use, quality of health care and HW perceptions is  
13  
14 being assessed concurrently in rural areas in the three countries. We describe the design of the trial  
15  
16 here, consistent with CONSORT reporting guidelines [6] and the extension for cluster randomised  
17  
18 controlled trials (CRCT) [7]; see Additional file 1.  
19  
20

## 21 22 **Methods**

### 23 24 25 **Aim**

26  
27 The aim of the trial is to address the research question: what are the effects of an innovative paper-  
28  
29 based HIS (PHISICC) on data use and quality, quality of health and HW perceptions compared with  
30  
31 the current HIS, in rural PHC settings?  
32  
33  
34  
35

### 36 37 **Patient and public involvement**

38  
39 There was no public or patient involvement in this research because the intervention being assessed  
40  
41 in these trials target health care providers and decision-makers, rather than patients or the public in  
42  
43 general. We have involved health systems stakeholders and frontline health workers. Ministries of  
44  
45 Health at several levels participated in the preparation of the research proposal (personal  
46  
47 consultations), in the characterisation of health information systems that preceded the trials  
48  
49 (countries workshops), and throughout all project components (additional workshops, newsletters  
50  
51 and personal communication). Frontline health workers in the three countries have co-created the  
52  
53 intervention (i.e. paper based tools) through workshops, personal feedback and piloting under real  
54  
55 live conditions. Some of them are part of the research team and co-authoring this manuscript.  
56  
57  
58  
59  
60

### Study design

The study is a CRCT in each of the three countries. In each setting, 70 health facilities are randomised to intervention or control (35 per arm). The intervention arm HF use the new PHISICC tools (substituting the usual HIS tools) and the control arm HF use the regular HIS tools. The trial is implemented in the real life contexts of HF carrying out their usual duties.

The CRCT are implemented in the real life contexts of HF carrying out their usual duties. The trials started between the end of 2019 and beginning of 2020, depending on the country, when the intervention was installed and the baseline surveys carried out; and will last till mid-2021.

### Study areas

Ministries of Health (MOH) officials in several countries were contacted before submitting the proposal to the funding agency in order to explore the willingness to engage in a project focusing on paper-based tools. Officials in several countries rejected the offer on the grounds of upcoming digitalisation plans of the HIS in the country. We partnered with MOH that found the research relevant to their context in three countries.

In each country, the eligibility criteria of study areas were that they had to belong to the operational area of research partners; contain a large enough number of health facilities and their catchment population; include vulnerable population (e.g. with low vaccination coverage, high childhood mortality); and be comparatively neglected in terms of infrastructure and services. We excluded areas with concurrent research or other types of activities that could conflict with the CRCT (such as the co-existence of another health-related study, massive developments in infrastructure or activities involving migration of the population, such as temporary work sites or changes in working sites) and areas with threats to safety or security that could jeopardise research activities.

The study areas are located in Adzopé, Agboville, Tiassalé and Sikensi districts (Côte d'Ivoire); in Funhalouro, Govuro, Homoine, Inhambane, Inharrime, Inhassoro, Mabote, Maxixe and Panda

1  
2  
3 (Inhambane province, Mozambique); and in Yala Local Government Authority (Cross-River State,  
4  
5 Nigeria).

### 6 7 **Eligibility of health facilities**

8  
9  
10 The intervention is implemented at the HF level. The eligibility criteria of the HF were that they had  
11  
12 to be located in the study areas, belong to the governmental health sector and their main activity  
13  
14 should be the delivery of PHC services. HF were excluded if they had specialised clinical services,  
15  
16 inpatients, physicians providing care or with plans for staff turn-over involving intervention and  
17  
18 control HF.  
19

20  
21 A 'master list' of eligible health facilities was prepared based on information provided by the MOH  
22  
23 across all study areas. We aimed at selecting 70 of the eligible HF in each country, using simple  
24  
25 random techniques in R [8].  
26  
27

### 28 29 **Allocation and blinding**

30  
31  
32 Allocation of the 70 HF per country into the intervention and control arms took place in a formal  
33  
34 event, gathering research partners and MOH officials to offer transparency and promote study  
35  
36 ownership by local and national authorities. Equally sized, folded pieces of paper with the names and  
37  
38 codes of included HF written on them were introduced in an opaque receptacle where they were  
39  
40 manually and blindly mixed. A second receptacle contained two equally sized pieces of paper, one  
41  
42 with the word 'intervention' and another one with the word 'control'. A selected person in the  
43  
44 meeting, not belonging to the research team, extracted one piece of paper at a time to reach half the  
45  
46 number of included HF. Then, a paper was extracted from the second receptacle to assign those HF  
47  
48 to the intervention or control arms. The rest of the papers were extracted as well to verify  
49  
50 completeness and no duplication of names, and those HF assigned to the other arm.  
51  
52

53  
54 Once HF were selected, all villages or settlements for each health facility catchment area were listed  
55  
56 and three in each catchment area were selected. In practice, we selected all villages because the  
57  
58 numbers were below (in Côte d'Ivoire) or just above (in Nigeria) the needs. For each village, we used  
59  
60

1  
2  
3 Google satellite maps to identify and geo-locate every visible roof. Where there were many houses  
4  
5 per village (roughly, more than fifty or so), a researcher would mark four points in the map slightly  
6  
7 beyond the northernmost, southernmost, easternmost and westernmost roofs seen and 30 random  
8  
9 points were selected within that square. From the mapped points, 10 per village (with 10 more acting  
10  
11 as reserve) were randomly selected and marked on another map used in the field for data collectors  
12  
13 to approach households. Where technical problems impeded this approach in a given village, a field  
14  
15 supervisor would rotate a bottle on the floor towards the centre of the village and would select at  
16  
17 random 10 households in the direction pointed by the bottle, from the outer limit of the village till  
18  
19 the centre [9].  
20  
21  
22

23 Blinding is only feasible for the research team members carrying out the CRCT data collection and the  
24  
25 analyses of the CRCT findings. The intervention (i.e. paper tools) are by design very different from the  
26  
27 existing system and it is not possible to blind participants or principal researchers.  
28  
29

30 We already had the agreement of the MOH and selected HF compliant with the inclusion criteria  
31  
32 were provided with the intervention shortly after completing the baseline data collection. Therefore,  
33  
34 recruitment as such took place at the same time of the allocation of HF into intervention and control  
35  
36 arms.  
37  
38  
39

#### 40 **The intervention**

41  
42 The PHISICC paper-based intervention is a full set of paper-based tools to support decision-making by  
43  
44 frontline HW. These are the only tools to be used by HW in the intervention arm. The PHISICC tools  
45  
46 encompass the whole system (i.e. recording and reporting) and all clinical and public health care  
47  
48 areas and are characterised by: a common visual language (e.g. spaces for digits and text),  
49  
50 standardised formats across health care areas; support to critical data items (e.g. respiratory rate in  
51  
52 infants); graphic artefacts to distinguish severity degrees of signs or symptoms; documentation of  
53  
54 diagnoses and treatment decisions; and aides memoires, among others.  
55  
56  
57  
58  
59  
60

1  
2  
3 The PHISICC tools have been developed over 18 to 20 months prior to the CRCT, using a Human  
4 Centred Design approach [10]. A strength of the Human Centred Design approach is its ability to  
5 unlock the user's perspective so that designers can build solutions that are fully reality-based and  
6 work well. Co-creation groups were formed in each country with researchers, staff from partner  
7 institutions and healthcare workers, led by a team of professional designers. Based on co-creation,  
8 participatory processes, and Human Centred Design principles, many iterations took place between  
9 co-creation groups and end-users of the tools, the frontline HW, till reaching a design that  
10 considered and addressed the main issues raised by HW (i.e. usability, clarity, size of tools). The  
11 PHISICC tools have been produced in French for Côte d'Ivoire, in Portuguese for Mozambique and  
12 English for Nigeria, which are the official languages used in the health systems in the three countries;  
13 using the official logo of the MOHs. Health care areas covered include: family planning, antenatal  
14 care, including tetanus toxoid vaccination, delivery, post-natal care, vaccination, sick child, adults  
15 outpatient consultation, tuberculosis diagnosis and treatment, and HIV. Referral forms were also  
16 designed.

17  
18  
19  
20  
21  
22  
23  
24  
25  
26  
27  
28  
29  
30  
31  
32  
33  
34 The PHISICC tools have three sub-components: registers, tallies and reports. Registers are formed by  
35 seven DIN-A3 and one DIN-A4 (for referrals) book covering all health care areas except for  
36 tuberculosis treatment, for which DIN-A3 cards were used. Register books have 100, 200 or 400  
37 pages depending on the country and health care area. They are used to record individual clients' data  
38 for each health care event, either of clinical or public health nature. Some register books have clinical  
39 notes at the very beginning, as 'aide memoires', and an example of a filled-in form, to assist HW  
40 when doubting how to proceed.

41  
42  
43  
44  
45  
46  
47  
48  
49  
50 Tallies are DIN-A3 single sheets which contain a list of the indicators to be transferred to higher levels  
51 of the health system, with a series of small ovals, grouped in fives, to mark with tally sticks with a  
52 pen. In contrast to the current systems that have no tallies or only for vaccination, tallies were  
53 created for all health care areas. In the middle-right side of the tally, a column accommodates cells  
54 aligned with the ovals to insert the count for each indicator; and in the far right of the sheet there is

1  
2  
3 a replica of the count column, separated with a perforated line, which is detached and sent, as part  
4  
5 of the monthly report to the higher level in the health system.  
6

7  
8 During three or four days, HW were trained on HIS before the start of the trial. In the intervention  
9  
10 arm they were trained on the PHISICC tools; and the control arm received a refresher training about  
11  
12 the regular tools, during the same number of days.  
13

14  
15 Additionally, given that the regular tools already contained information on past vaccination history of  
16  
17 children still to complete their vaccination schedule, we created a mechanism to retrieve data of  
18  
19 children's vaccination status to transcribe into the new vaccination register book in the intervention  
20  
21 arm ('system transition').  
22

23  
24 Tools were endorsed by MOH, printed in local printing companies and distributed to HW at the end  
25  
26 of the training sessions. A digital spreadsheet was created to monitor consumption and order  
27  
28 additional tools to cover health facility needs during the life of the trial.  
29

### 30 31 **Outcomes**

32  
33  
34 There are five primary outcomes (Table 1). Vaccination adherence is defined as the total number of  
35  
36 vaccine doses given during the trial period in the correct time interval to children over the total  
37  
38 number of vaccine doses that should have been given during the same period. Antenatal care visits  
39  
40 uptake will also be considered depending on the expected number of pregnancies in the study areas.  
41  
42 Both are used as proxies for health outcomes in terms of protection against disease [11] and  
43  
44 prevention of pregnancy complications [12]. Data concordance is defined as the level of agreement  
45  
46 of HIS indicators between (i) records, (ii) tallies and (iii) reports [3]. In terms of data use for decision  
47  
48 making, we will estimate the diagnostics scope in the sick child (i.e. number of different diagnoses  
49  
50 per child; and treatment appropriateness (i.e. number of prescribed treatments that are supported  
51  
52 by a documented diagnosis). Health workers satisfaction will be assessed using a standardised  
53  
54 questionnaire [13,14,15]. While the intervention targets HF, some of the outcomes are measured at  
55  
56 the level of HF, and some from patients clustered within HF catchment areas.  
57  
58  
59  
60

1  
2  
3 Secondary outcomes are classified under the following domains: data quality, data user, mortality,  
4  
5 HW experience, clients experience and resource consumption:  
6  
7

- 8 • Data quality
  - 9
  - 10 ○ Completeness of recording and reporting in specific forms; i.e. prevalence of unduly
  - 11 missing data items; partograph used;
  - 12
  - 13 ○ accuracy of recorded figures in comparison to real events (e.g. physical counting of
  - 14 commodities, such as number of 500mg Paracetamol tablets as recorded versus
  - 15 number of 500mg Paracetamol tablets as counted;
  - 16
  - 17 ○ timeliness of reporting, as documented by time stamps in forms;
  - 18
  - 19 ○ loss of data or data which does not reach the next upper administrative level.
  - 20
  - 21
  - 22
  - 23
  - 24
  - 25
- 26 • Data use
  - 27
  - 28 ○ in terms of knowledge (e.g. vaccines due based on date of birth; weight for length
  - 29 assessments);
  - 30
  - 31 ○ cases of different conditions properly treated in (e.g. diarrhoea cases given oral
  - 32 rehydration therapy according to national guidelines; pneumonia cases given
  - 33 appropriate antibiotic according to national guidelines;
  - 34
  - 35 ○ public health decisions: availability of lost to follow up lists or plans for vaccination,
  - 36 tuberculosis and or HIV/AIDS treatment control;
  - 37
  - 38 ○ occurrence of stock outs of essential drugs
  - 39
  - 40
  - 41
  - 42
  - 43
  - 44
  - 45
- 46 • Overall under-5s mortality and under-5s mortality excluding peri-natal mortality [16].
- 47
- 48 • Health workers 'human experience' and satisfaction
- 49
- 50 • District health information officers' 'human experience'
- 51
- 52
- 53 • Clients 'human experience' and satisfaction
- 54
- 55
- 56
- 57
- 58
- 59
- 60

- Resources consumption (e.g. time use, costs)
  - intervention costs: tools, training, start-up;
  - time used for recording and reporting (e.g. time-motion study) [17];
  - cost-effectiveness per unit of additional improvement in outcomes of interest.

In addition, we will consider ‘explanatory outcomes’ that will help to understand how the measured effects have taken place and why. We will look at the details of the interplay between the intervention, the system, the users and the context. Process indicators will be based on the documented activities that have taken place, from the conception of the intervention, up to its implementation, monitoring and evaluation. Process indicators may include: intervention set up and implementation, monitoring of the use of the intervention, special activities targeted at vulnerable populations, district reactions related to the intervention, handling of data coming from the new system, sustainability based on costs information and perceptions, alignment with national health policies and donor priorities. We will also explore health care services characteristics looking at generic indicators from health facilities, such human resources profiles and relations with the communities, population characteristics and system and context characteristics captured in early stages of the project, where data are available.

### **Sample size calculations**

The required sample sizes for each primary outcome were determined using simulation. This allowed us to account for levels of clustering (Table 1). We used the regression models detailed in the data section to analyse the simulated trials and estimate the power. The simulation code was written in R. For each country, we required the probability of a type I error (rejecting the null hypothesis when it is actually true)  $\alpha$  to be less than 0.05 and a power of 80%.

The sampling frames are the study areas in each country, which include the health facilities and households in their catchment areas.



1  
2  
3 For vaccination adherence, using a sample size of 35 HF per arm, we would have 80% power in each  
4 country to detect as significant a difference between a proportion of due vaccines given from 75% in  
5 the control to 85% in the intervention arms, assuming one child per household, 30 households per HF  
6 and a between-HF variation equivalent to a  $k$  of 0.1, where  $k$  is equal to the standard deviation  
7 divided by the mean. The value of  $k$  is unknown, but was chosen in line with general observations by  
8 Hayes and Bennet [18].  
9

10  
11 For data quality outcomes, with 35 HF per arm we would be able to detect as significant a difference  
12 from a ratio of 0.7 (reported : recorded) vaccinations in the control arm to 0.8 with the intervention  
13 with 80% power, assuming 100 recorded vaccinations per HF and a standard deviation of 0.1 in the  
14 ratios between HF.  
15

16  
17 In terms of diagnostic scope, we would be able to detect an increase in the proportion of child-visits  
18 with more than one diagnosis from 30% to 35% with 80% power with 35 HF per arm, 60 records per  
19 HF and assuming a  $k$  of 0.1 [Error! Bookmark not defined.].  
20

21  
22 We would be able to detect as significant an increase from 50% of treatments having a  
23 corresponding appropriate diagnosis to 60% with 80% power assuming 35 HF per arm, 1 treatment  
24 per child, 25 children per HF and variation between HF corresponding to  $k = 0.1$  [Error! Bookmark  
25 not defined.].  
26

27  
28 For the outcome related to health workers' satisfaction, we would be able to detect as significant an  
29 increase from 50% of health workers satisfied to 90%, with 80% power assuming 35 HF, three health  
30 workers per HF and a variation between HF equivalent to  $k = 0.1$ .  
31

32  
33 In summary, in each country we require 35 HF per arm, three HW per HF, 100 vaccination records  
34 per HF, 60 sick child records per health facility and 30 children per health facility catchment area.  
35  
36  
37  
38  
39  
40  
41  
42  
43  
44  
45  
46  
47  
48  
49  
50  
51  
52  
53  
54  
55  
56  
57  
58  
59  
60

### Data collection and management

Data collection took place at baseline and will take place again at the end of the study. Data is collected from health facilities, from the households in the catchment areas of the included health facilities and also from district offices.

For data quality and data use outcomes, HF registers, tallies and reports will be scrutinised. For population based outcomes, we carry out household surveys at baseline and at end-line. We use standard approaches for these types of surveys [19]. Households are visited, the research project is briefly introduced and consent requested.. Ideally, mothers of alive children or women in child-bearing age were interviewed in order to obtain information on living children (i.e. vaccination history) and death events, respectively, using home-based records if available and accessible. Patients' satisfaction will be assessed using the PSQ-18 satisfaction questionnaire [20,21,22]. Essentially, the tool enables practitioners to investigate the extent to which their health care service meets the perceived needs of their client group and pinpoint areas for improvement [22]. The interview will be conducted with consenting patients as close to their care encounter as possible [23]. Data tools are translated into the official languages of the study countries and pilot tested for consistent meaning and relevance to the setting. Data collectors are also able to communicate in local languages. The Satisfaction of Employees in Health Care (SEHC) survey is a validated tool to assess staff satisfaction. It was first developed and validated in a low-income country (Ethiopia) [24] and later successfully validated in a high-income country (USA) [25].

We use a mix of paper and electronic data (ODK [26]) collection tools. Data collectors are trained to minimise error. Tools are piloted before implementing. ODK data is regularly stored and sent to secure servers, as soon as data collectors reach their office base. Data from paper tools is double entered and compared and sent to secure servers. Each data collection tool has its corresponding electronic database that is cleaned and submitted to the analyses. All data is anonymised at the point of data collection or as soon as possible in the data management process. Data is labelled with an

1  
2  
3 arm code (e.g. 'A' or 'B') without any further information allowing to disclose which data items  
4  
5 belong to the intervention or to the control arms, ensuring blinding during data analyses.  
6

7  
8 Quality will be assured through several mechanisms: piloting of data collection tools; thorough  
9  
10 training of field workers; checking missing data related; double, independent data entry from papers  
11  
12 into digital databases; early descriptive analyses to detect potential outliers; fieldworkers tracking  
13  
14 and supervision.  
15

### 16 17 18 **Data analysis**

19  
20 The analysis will be carried out for each country separately, and based on intention-to-treat.

21  
22 At baseline, data on population and health facility characteristics (i.e. basic demographic  
23  
24 characteristics of population and health workers, professional profile of health workers, health  
25  
26 facility size and services) will be produced and presented. If large imbalances are detected at  
27  
28 baseline, this information can be used to adjust the effect estimate comparisons [27,28].  
29

30  
31 The analyses vary for the different primary outcomes due to the unit of measurement and levels of  
32  
33 clustering, the type of variable, and whether measurements were taken at baseline and endpoint or  
34  
35 endpoint only. We use regression models to allow us to estimate the effect of the outcome while  
36  
37 flexibly accounting for these issues and allowing adjustment for potential confounders.  
38

39  
40 Logistic regression will be used for the binary variables: vaccine adherence is measured by  
41  
42 determining whether each vaccine due was received, and treatment appropriateness by whether  
43  
44 each treatment was correctly prescribed. Data concordance and diagnostic scope are count variables  
45  
46 and may be analysed with Poisson regression, depending on their distribution. The regression model  
47  
48 for HW satisfaction will depend on how it is distributed.  
49

50  
51 The outcomes have different levels of clustering (children or consultations, HW, HF). We will account  
52  
53 for these levels of clustering by including random effects in the regression models.  
54

55  
56 Four of the primary outcomes are measured at baseline and end-line. The effect of the intervention  
57  
58 will be estimated using an interaction term between arm and survey in the regression models: ie is  
59  
60

1  
2  
3 the change in the outcome between baseline and follow-up in the intervention arm different to the  
4  
5 change between baseline and follow-up in the control arm. The effect of HW satisfaction, measured  
6  
7 only at end-line, will be estimated as the difference between the intervention and control arm.  
8  
9

10 All estimates for the effect of the intervention will be presented with 95% confidence intervals. The  
11  
12 analyses will be carried out using R [29].  
13  
14

### 15 **Measures to minimise bias**

16  
17 Statistical analyses will be carried out blindly, without knowledge of what health facilities or  
18  
19 population in the catchment area belong to the intervention or control groups. Only when the  
20  
21 analysis code is considered as definitive and fixed, will results be shared with the wider investigators  
22  
23 team and the arms for health facilities and population will be disclosed.  
24  
25

26  
27 Outcome measurement bias may take place where data from the HIS, which is the focus of the  
28  
29 intervention, is used to measure outcomes. However, we will minimise this by assessing population  
30  
31 based outcomes at household level.  
32  
33

34 Contamination (i.e. the intervention affects individuals or units assigned to the control arm) may  
35  
36 happen via the exchanges between health workers from health facilities in both arms; for example:  
37  
38 in monthly district data quality meetings, managerial meetings; or through inputs from supervisors  
39  
40 who influence control health facilities with intervention tips encountered in health facilities of the  
41  
42 intervention arms. One mechanism to address this issue is using a district-based cluster  
43  
44 randomisation scheme. However, we consider that (i) contamination, despite increasing the  
45  
46 awareness of health works in control health facilities, will hardly influence the decision making  
47  
48 mechanisms that the HIS intervention focuses on; and (ii) randomisation at the level of district poses  
49  
50 additional challenges that are not worth the marginal benefit of reducing a doubtful contamination  
51  
52 [30].  
53  
54

55  
56 The spill over effect (i.e. benefits of the intervention extend beyond their direct recipients) [31] may  
57  
58 take place in higher levels of the health systems; e.g. districts data managers and programme  
59  
60

1  
2  
3 managers may experience the benefits of better structured and more timely data produced in health  
4 facilities in the intervention arms. The trial will have no capacity to quantitatively account for spill  
5  
6  
7  
8  
9  
10  
11  
12  
13  
14  
15  
16  
17  
18  
19  
20  
21  
22  
23  
24  
25  
26  
27  
28  
29  
30  
31  
32  
33  
34  
35  
36  
37  
38  
39  
40  
41  
42  
43  
44  
45  
46  
47  
48  
49  
50  
51  
52  
53  
54  
55  
56  
57  
58  
59  
60

managers may experience the benefits of better structured and more timely data produced in health facilities in the intervention arms. The trial will have no capacity to quantitatively account for spill overs at higher levels of the system, due to the limited number of higher level administrative areas that will be involved in the trial. However, through process indicators, we will consider potential benefits and harms of the intervention at higher levels of the system.

A challenge is the Hawthorne effect (i.e. observer effect). Both health workers in the intervention and in the control sites will have an awareness of being observed as data collection activities will be at the same level of intensity in the two arms. Therefore, there should be no differential effect.

Analyses will be based on the intention-to-treat. It is important to closely monitor if the intervention HFs consistently use the new HIS tools and approaches. The data collection team and the trial monitoring team will check if old forms are still being used in the intervention health facilities.

However, we do not expect health facilities to migrate between intervention and control arms, or vice versa, due to feasibility issues. On the other hand, some household members in a given catchment area may decide to seek for health care in a health facility belonging to another trial arm. In these cases, households will be analysed as belonging to the original trial arm.

## Discussion

This is one of the very few studies assessing the effects of health systems interventions using experimental study designs [32]. Most of the experimental studies on HIS are circumscribed to specific health care areas (e.g. tuberculosis, vaccination, cardiovascular disease) and very few have a system-wide approach (e.g. PHC) [32]. This is the only experimental study we are aware of, focusing on paper-based HIS.

To date, some modifications to the protocol have taken place. In Côte d'Ivoire, we decided to select study areas close to the research institution base on logistics and practical reasons, instead of selecting an area in the north of the country, where poorer health indicators have been described. In Mozambique, the low density of HF per population implied extremely vast distances between HF and

1  
2  
3 this, coupled with the rainy season, made the trial unfeasible in the originally selected Nampula  
4 province. After consultations, we decided to move the trial to the province of Inhambane and cancel  
5 the household survey. The allocation of HF to the intervention and control arms was completed using  
6 random number generation.  
7  
8  
9

10  
11  
12 Experimental studies for health systems interventions are sometimes dismissed because of their  
13 limited capacity to provide reliable explanations of complex health system issues [33]. While we  
14 acknowledge these limitations, there is also a need for more robust evidence on the effects of these  
15 types of health system interventions [34] and there are also good examples of experimental studies  
16 reporting findings that can make it to the policy arena [35]. When embarking on this research, we  
17 considered the type of evidence required to contribute to systematic reviews [36], guidance  
18 development [37] and eventually recommendations for policy and practice [38]. Furthermore, we  
19 have embedded the CRCT in a comprehensive research context which includes systematic reviews of  
20 the literature and qualitative research, and we are also looking at explanatory outcomes within the  
21 CRCT itself. We believe that this approach will provide a more comprehensive picture of what has  
22 happened with the PHISICC tools used by HW and why.  
23  
24  
25  
26  
27  
28  
29  
30  
31  
32  
33  
34  
35

36  
37 We acknowledge the challenges of carrying out research on health care provided to remote, rural  
38 communities (in this case in Sub-Saharan Africa). However, it is only in these remote areas where  
39 research about their specific problems and needs can take place. Challenges included long distances,  
40 poor conditions of roads, unreliable communications and limited food and accommodation services,  
41 all of them to be proactively handled to keep the quality of work and the morale of researchers and  
42 collaborators.  
43  
44  
45  
46  
47  
48  
49

50  
51 The engagement and ownership of partners within this research has also been instrumental in order  
52 to plan and implement the CRCT. The intervention actually targets a governmental sub-system (the  
53 HIS) for which we required more than permission but also endorsement and active support. We  
54 achieved this level of collaboration by ensuring the participation of key stakeholders in key phases of  
55  
56  
57  
58  
59  
60

1  
2  
3 the whole project, from inception till the implementation of the last phases, through frequent  
4  
5 communication and workshops.  
6

7  
8 We are aware of the current trends towards digitalization of HIS. However, WHO recommendations  
9  
10 on the matter are weak since the underlying evidence to support these recommendations is  
11  
12 inconsistent [39]. The principles and methodological approaches in PHISICC can be applied to the  
13  
14 development of any technological solution, being on paper, digital or mixed. PHISICC, is not mainly  
15  
16 about technologies to support data, but rather about a change in paradigm where life-saving  
17  
18 decisions by frontline health workers are at the centre of the intervention; facilitating as well the  
19  
20 information requirements of higher levels in the health system.  
21  
22

23  
24 We expect that the results of the trials, both quantitative and qualitative, will be able to inform  
25  
26 policies on how to make HIS responsive to providers' decision-making needs, particularly in health  
27  
28 services where the most vulnerable live.  
29  
30

### 31 **Authors' contributions**

32  
33  
34 XBC, AOI, AM, RBY and CAU prepared the proposal for the funding agency, conceived the study and  
35  
36 produced the data collection tools. SG ensured the regulatory, ethical and trial monitoring  
37  
38 components. AR developed the analytical approaches and made the sample size calculations. RBY,  
39  
40 MS and SB adapted the protocol to the context of Côte d'Ivoire and managed the administrative and  
41  
42 ethical approvals in the country; AOI, NE, OK, ANN and ABB likewise in Nigeria; AM, SML and GM, in  
43  
44 Nampula province (Mozambique); JS and TM adapted the protocol and acquired ethical and  
45  
46 administrative clearances for Inhambane province (Mozambique). DB is chair of the PHISICC  
47  
48 Technical Advisory Group (TAG) and has coordinated multiple formal and informal inputs. LKK and DB  
49  
50 have advised on the adequacy of the study protocol within the overall PHISICC proposal and TAG  
51  
52 advices. All country teams participated in PHISICC workshops and ensured that the protocol was  
53  
54 suitable to countries realities; developed data collection tools and training materials. They are  
55  
56  
57  
58  
59  
60

1  
2  
3 responsible for the implementation of the trial in each country. XBC drafted the first version of the  
4  
5 manuscript. All authors commented on several versions of the manuscript.  
6  
7

## 8 **Acknowledgements**

9  
10 Members of the PHISICC Technical Advisory Group, chaired by David Brown: Blanche Anya (WHO  
11  
12 AFRO), Abdallah Bchir (former Gavi), Marta Gacic-Dobo (WHO HQ), Richard Greffé (AIGA), Pamela  
13  
14 Mitula (WHO AFRO), Sandy Oliver (UCL Institute) and Chris Wolf (BGMF).  
15  
16

17  
18 Research collaborators: Momade Ali, Celso Belo, Bassirou Bonfoh, Lisa Diallo, John Ferreira, Bernard  
19  
20 Guessanbi, Caitlin Jarrett, Inza Koné, Felix Malé, Kouadio M'bra, David O'Donnell, Damaris Rodríguez  
21  
22 (Sonder Collective), Melanie Wendland and Meike Zuske (Swiss TPH).  
23  
24

25 Stakeholders from Côte d'Ivoire, Mozambique and Nigeria, participating in the consultation  
26  
27 processes.  
28  
29

## 30 **Data sharing statement**

31  
32 We report on a protocol of three Cluster Randomised Controlled Trials and therefore no data is  
33  
34 available yet. On completion of the trials, access to data will be available from the national research  
35  
36 institutions in Côte d'Ivoire, Mozambique and Nigeria, in publications and in funding agency. Data  
37  
38 will be made available via an online data repository. Access will be granted following a review of  
39  
40 requests by SwissTPH contract officer.  
41

## 42 **Ethical approvals in Côte d'Ivoire, Mozambique and Nigeria**

- 43 - Comité National Ethique des Sciences de la Vie et de la Santé (CNESVS), reference: 024-  
44  
45 19/MSHP/CNESVS-kp (Côte d'Ivoire)
- 46 - Comité Institucional de Bioética para Saúde da Universidade Lúrio, reference: 16.2/Julho/CBISUL/19  
47  
48 (Mozambique)
- 49 - Secretary, Government of Cross River State of Nigeria, Ministry of Health, Calabar Health Research  
50  
51 Ethics Committee, reference: CRS/MH/HREC/018/Vol. V1/151 (Nigeria)
- 52  
53 - Ethikkommission Nordwest- und Zentralschweiz (EKNZ), reference: 2018-01059 (Switzerland).  
54  
55  
56  
57

## 58 **Funding**

59  
60 Funder by the Bill & Melinda Gates Foundation, grant number INV-010193 / OPP1135947.



## Abbreviations

BMGF Bill & Melinda Gates Foundation

CIV Côte d'Ivoire

CRCT Cluster Randomised Controlled Trial

sd Standard deviation

HF Health Facility

HW Health worker

MOZ Mozambique

NGA Nigeria

WHO World Health Organisation

## Additional files

- Additional file 1: CONSORT statement checklist.

## Competing interests

No, there are no competing interests for any author.

## References

- 1 WHO. Monitoring results with health facility information systems: A technical consultation Glion-sur-Montreux, Switzerland, 11–12 June 2014. WHO 2014.
- 2 WHO. Health facility & community data toolkit. WHO 2014.
- 3 Bosch-Capblanch X, Ronveaux O, Doyle V, Remedios V, Bchir A. Accuracy and quality of immunization information systems in forty-one low income countries. *Trop Med Int Health*. 2009 Jan;14(1):2-10. doi: 10.1111/j.1365-3156.2008.02181.x. PMID: 19152556.
- 4 Loder E. Promises, promises. *BMJ*. 2017 Mar 23;356:j1446. doi: 10.1136/bmj.j1446. PMID: 28336513.
- 5 Wenger N, Méan M, Castioni J, Marques-Vidal P, Waeber G, Garnier A. Allocation of Internal Medicine Resident Time in a Swiss Hospital: A Time and Motion Study of Day and Evening Shifts. *Ann Intern Med*. 2017 Apr 18;166(8):579-586. doi: 10.7326/M16-2238. Epub 2017 Jan 31. PMID: 28135724.
- 6 Schulz KF, Altman DG, Moher D, for the CONSORT Group. CONSORT 2010 Statement: updated guidelines for reporting parallel group randomised trials.
- 7 Campbell MK, Piaggio G, Elbourne DR, Altman DG; for the CONSORT Group. Consort 2010 statement: extension to cluster randomised trials. *BMJ*. 2012;345:e5661.
- 8 R Core Team. R: A Language and Environment for Statistical Computing [Internet]. Vienna, Austria; 2020. Available from: <https://www.R-project.org/>
- 9 Bostoen K, Chalabi Z. Optimization of household survey sampling without sample frames. *Int J Epidemiol*. 2006 Jun;35(3):751-5. doi: 10.1093/ije/dyl019. Epub 2006 Feb 15. PMID: 16481364.
- 10 Johnson, Sandhu, Tyler, “The Next Step for Human-Centered Design in Global Public Health” *Stanford Social Innovation Review*, Oct. 22, 2019.
- 11 WHO. Global Vaccine Action Plan 2011-2020. WHO 2013.
- 12 Carroli G, Villar J, Piaggio G, Khan-Neelofur D, Gülmezoglu M, Mugford M, Lumbiganon P, Farnot U, Bersgjø P; WHO Antenatal Care Trial Research Group. WHO systematic review of randomised controlled trials of routine antenatal care. *Lancet*. 2001 May 19;357(9268):1565-70. doi: 10.1016/S0140-6736(00)04723-1. PMID: 11377643.
- 13 Alpern R, Canavan ME, Thompson JT, McNatt Z, Tatak D, Lindfield T, Bradley EH. Development of a brief instrument for assessing healthcare employee satisfaction in a low-income setting. *PLoS One*.

1  
2  
3  
4  
5  
6  
7 2013 Nov 5;8(11):e79053. doi: 10.1371/journal.pone.0079053. PMID: 24223878; PMCID:  
8 PMC3818514.

9  
10 14Doll WJ and Torkzadeh G. The measurement of end-user computing satisfaction. *MIS Quarterly*  
11 1988;12(2):259–74; 19.

12  
13 15 Ilias A, Yasoa MR, Razaka MZA and Rahmana RA. The study of end-user computing satisfaction  
14 (EUCS) on computerised accounting system (CAS) among Labuan F.T. Government sectors: a case  
15 study in the responsibility centres. *Labuan e-Journal of Muamalat and Society* 2007;1:1–13.

16  
17 16 Arifeen SE, Hoque DM, Akter T, Rahman M, Hoque ME, Begum K, Chowdhury EK, Khan R, Blum LS,  
18 Ahmed S, Hossain MA, Siddik A, Begum N, Sadeq-ur Rahman Q, Haque TM, Billah SM, Islam M, Rumi  
19 RA, Law E, Al-Helal ZA, Baqui AH, Schellenberg J, Adam T, Moulton LH, Habicht JP, Scherpbier RW,  
20 Victora CG, Bryce J, Black RE. Effect of the Integrated Management of Childhood Illness strategy on  
21 childhood mortality and nutrition in a rural area in Bangladesh: a cluster randomised trial. *Lancet*.  
22 2009 Aug 1;374(9687):393-403. doi: 10.1016/S0140-6736(09)60828-X. PubMed PMID: 19647607.

23  
24 17 Tilahun H, Fekadu B, Abdisa H, Canavan M, Linnander E, Bradley EH, Berman P. Ethiopia's health  
25 extension workers use of work time on duty: time and motion study. *Health Policy Plan*. 2017 Apr  
26 1;32(3):320-328. doi: 10.1093/heapol/czw129. PubMed PMID: 27658649.

27  
28 18 Hayes RJ, Bennett S. Simple sample size calculation for cluster-randomized trials. *Int J Epidemiol*.  
29 1999 Apr;28(2):319-26.

30  
31 19 The DHS program. Demographic and Health surveys. <https://dhsprogram.com/>.

32  
33 20 Thayaparan, A. a. (2013). The Patient Satisfaction Questionnaire Short Form (PSQ-18) as an  
34 adaptable, reliable, and validated tool for use in various settings. *Med Educ Online*, 18.

35  
36 21 The Health Foundation. (2013, June). Measuring patient experience (no.18). Retrieved Nov 6,  
37 2018, from [www.health.org.uk](http://www.health.org.uk): [https://www.health.org.uk/publication/measuring-patient-](https://www.health.org.uk/publication/measuring-patient-experience)  
38 [experience](https://www.health.org.uk/publication/measuring-patient-experience).

39  
40 22 Grogan, S. C. (2000). Validation of a questionnaire measuring patient satisfaction with general  
41 practitioner services. *Quality in Health Care*, 9, 210-215.

42  
43 23 LaVela, S. L. (2014). Evaluation and measurement of patient experience. *Patient Experience*  
44 *Journal*, 1(1), Article 5.

45  
46 24Alpern, R. C. (2013, November). Development of a Brief Instrument for Assessing Healthcare  
47 Employee Satisfaction in a Low-Income Setting. *PLOS ONE*, 8(11), e79053.

- 1  
2  
3  
4  
5  
6  
7 25 Chang, E. C. (2017). Measuring job satisfaction among healthcare staff in the United States: a  
8 confirmatory factor analysis of the Satisfaction of Employees in health Care (SEHC) survey.  
9 International Journal for Quality in health Care, 29(2), 262-268.  
10  
11 26 Open Data Kit. <https://opendatakit.org/>. Accessed 5<sup>th</sup> February 2021.  
12  
13 27 Pocock S, et al. Subgroup analysis, covariate adjustment and baseline comparisons in clinical trial  
14 reporting: current practice and problems. Stat Med. 2002;21:2917-30.  
15  
16 28 The CONSORT Group. CONSORT Statement [Internet]; item 15.  
17  
18 29 R Core Team. R: A language and environment for statistical computing. R Foundation for  
19 Statistical Computing, Vienna, Austria. URL <https://www.R-project.org/>.  
20  
21 30 Torgerson David J. Contamination in trials: is cluster randomisation the answer? BMJ 2001;  
22 322:355.  
23  
24 31 Benjamin-Chung J, Arnold BF, Berger D, Luby SP, Miguel E, Colford JM Jr, Hubbard AE. Spillover  
25 effects in epidemiology: parameters, study designs and methodological considerations. Int J  
26 Epidemiol. 2018 Feb 1;47(1):332-347. doi: 10.1093/ije/dyx201. PubMed PMID: 29106568; PubMed  
27 Central PMCID: PMC5837695.  
28  
29 32 Leon N, Balakrishna Y, Hohlfeld A, Odendaal WA, Schmidt BM, Zweigenthal V, Anstey Watkins J,  
30 Daniels K. Routine Health Information System (RHIS) improvements for strengthened health system  
31 management. Cochrane Database Syst Rev. 2020 Aug 13;8:CD012012. doi:  
32 10.1002/14651858.CD012012.pub2. PMID: 32803893.  
33  
34 33 Allanson ER, Tunçalp Ö, Vogel JP, Khan DN, Oladapo OT, Long Q, Gülmezoglu AM. Implementation  
35 of effective practices in health facilities: a systematic review of cluster randomised trials. BMJ Glob  
36 Health. 2017 Jul 20;2(2):e000266. doi: 10.1136/bmjgh-2016-000266. PMID: 29081997; PMCID:  
37 PMC5656132.  
38  
39 34 Brown DW, Bosch-Capblanch X, Shimp L. Where Do We Go From Here? Defining an Agenda for  
40 Home-Based Records Research and Action Considering the 2018 WHO Guidelines. Glob Health Sci  
41 Pract. 2019 Mar 29;7(1):6-11. doi: 10.9745/GHSP-D-18-00431. PMID: 30877139; PMCID:  
42 PMC6538131.  
43  
44 35 Joos O, Silva R, Amouzou A, Moulton LH, Perin J, Bryce J, et al. Evaluation of a mhealth data  
45 quality intervention to improve documentation of pregnancy outcomes by health surveillance  
46 assistants in Malawi: a cluster randomized trial. PloS One 2016;11(1):e0145238. PMID: 26731401.  
47  
48 DOI: <https://doi.org/10.1371/journal.pone.0145238>  
49  
50  
51  
52  
53  
54  
55  
56  
57  
58  
59  
60

1  
2  
3  
4  
5  
6  
7 36 Langlois EV, Ranson MK, Bärnighausen T, Bosch-Capblanch X, Daniels K, El-Jardali F, Ghaffar A,  
8 Grimshaw J, Haines A, Lavis JN, Lewin S, Meng Q, Oliver S, Pantoja T, Straus S, Shemilt I, Tovey D,  
9 Tugwell P, Waddington H, Wilson M, Yuan B, Røttingen JA. Advancing the field of health systems  
10 research synthesis. *Syst Rev*. 2015 Jul 10;4:90. doi: 10.1186/s13643-015-0080-9. PMID: 26159806;  
11  
12  
13  
14  
15  
16  
17  
18  
19  
20  
21  
22  
23  
24  
25  
26  
27  
28  
29  
30  
31  
32  
33  
34  
35  
36  
37  
38  
39  
40  
41  
42  
43  
44  
45  
46  
47  
48  
49  
50  
51  
52  
53  
54  
55  
56  
57  
58  
59  
60

PMCID: PMC4498528.

37 Bosch-Capblanch X, Lavis JN, Lewin S, Atun R, Røttingen JA, Dröschel D, Beck L, Abalos E, El-Jardali  
F, Gilson L, Oliver S, Wyss K, Tugwell P, Kulier R, Pang T, Haines A. Guidance for evidence-informed  
policies about health systems: rationale for and challenges of guidance development. *PLoS Med*.  
2012;9(3):e1001185. doi: 10.1371/journal.pmed.1001185. Epub 2012 Mar 6. PMID: 22412356;  
PMCID: PMC3295823.

38 WHO. WHO recommendations on home-based records for maternal, newborn and child health.  
WHO 2018.

39 WHO. Recommendations on digital interventions for health system strengthening. WHO  
guideline. WHO 2019.

## Tables and Figures

**Table 1. Outcomes and parameters used to estimate the sample sizes.**

|   | <b>Outcome name</b>           | <b>Subjects</b>                      | <b>Definition</b>                                                                                                                                                                               | <b>Baseline estimate</b>                | <b>Expected change</b>                     | <b>Comments</b>                                                                 |
|---|-------------------------------|--------------------------------------|-------------------------------------------------------------------------------------------------------------------------------------------------------------------------------------------------|-----------------------------------------|--------------------------------------------|---------------------------------------------------------------------------------|
| 1 | Vaccination adherence         | Children under-1 in the households   | Number of vaccines given in the previous calendar year over the number of vaccine due in the same period                                                                                        | 75 given per 100 due                    | Increase of 10 per 100                     | Vaccines are clustered within children, and children within HFs                 |
| 2 | Data concordance              | Recording tools in health facilities | Number of health care events (e.g. vaccinations, antenatal care consultations) recounted in the previous calendar year versus the number of health care events reported in the same time period | 7 recounted for each 10 reported [3]    | Increase of 2 recounted                    | A single estimate can be obtained in each HF or by time periods (no clustering) |
| 3 | Diagnostic scope              | Records of sick child consultations  | Number of diagnosis in each sick child consultation during the previous calendar year                                                                                                           | 1 or 2 per child                        | 30% to 35% with more than 1 diagnosis      | Individual consultations are clustered within HF                                |
| 4 | Treatment appropriateness     | Records of sick child consultations  | Number of treatments correctly prescribed in each sick child consultation during the previous calendar year                                                                                     | Half appropriate over all consultations | Increase to three quarters appropriateness | Individual consultations are clustered within HF                                |
| 5 | Health workforce satisfaction | Health workers                       | Degree (score) of satisfaction across all health facilities in each arm, with the intervention                                                                                                  | 5 out of 10                             | 9 out of 10                                | Maybe two or three health workers can be approached in each health facility     |

### Figure 1. CONSORT diagram: trial flow chart.

Separate file.

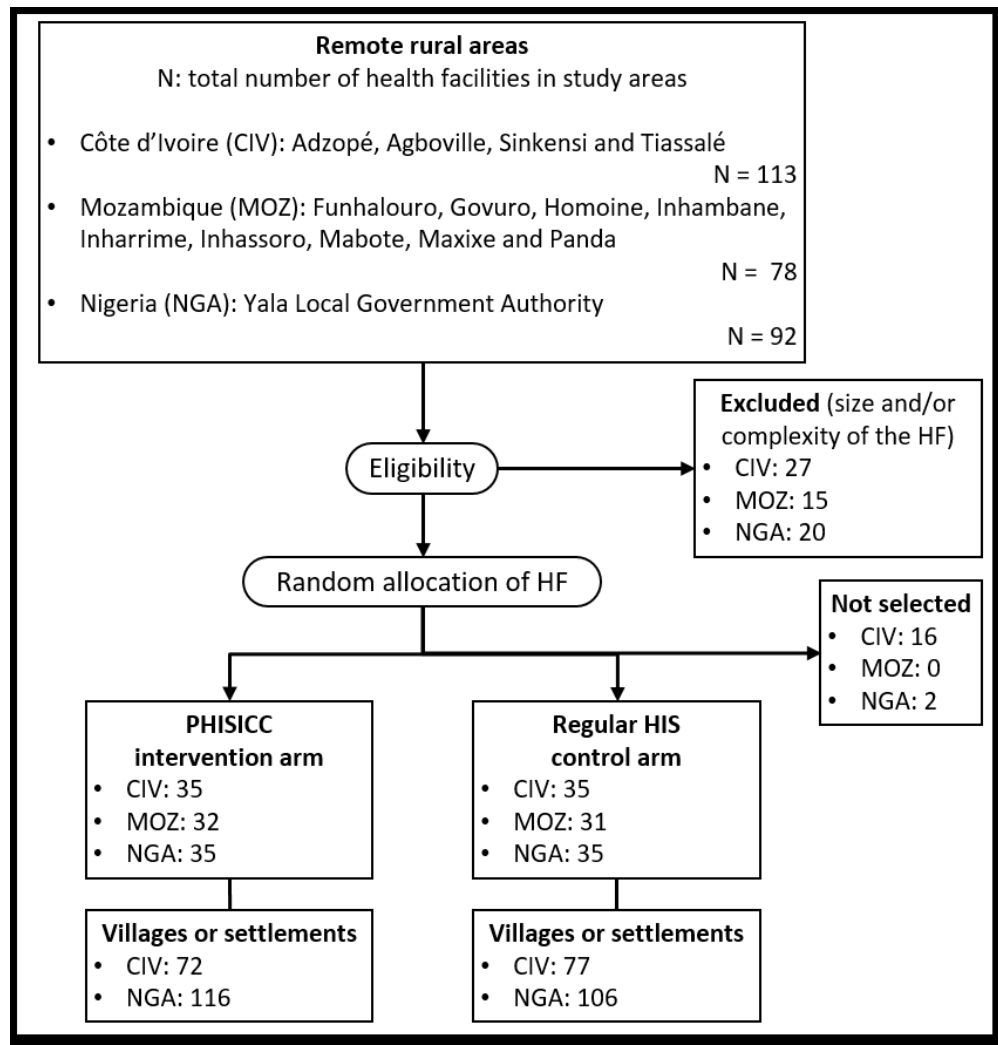

144x150mm (150 x 150 DPI)

**Table 1: CONSORT 2010 checklist of information to include when reporting a cluster randomised trial**

| Section/Topic                    | Item No | Standard Checklist item                                                                                                               | Extension for cluster designs                                                                                                                                                                                      | Page No *          |
|----------------------------------|---------|---------------------------------------------------------------------------------------------------------------------------------------|--------------------------------------------------------------------------------------------------------------------------------------------------------------------------------------------------------------------|--------------------|
| <b>Title and abstract</b>        |         |                                                                                                                                       |                                                                                                                                                                                                                    |                    |
|                                  | 1a      | Identification as a randomised trial in the title                                                                                     | Identification as a cluster randomised trial in the title                                                                                                                                                          | 1                  |
|                                  | 1b      | Structured summary of trial design, methods, results, and conclusions                                                                 | See table 2                                                                                                                                                                                                        | 5                  |
| <b>Introduction</b>              |         |                                                                                                                                       |                                                                                                                                                                                                                    |                    |
| <b>Background and objectives</b> | 2a      | Scientific background and explanation of rationale                                                                                    | Rationale for using a cluster design                                                                                                                                                                               | 4                  |
|                                  | 2b      | Specific objectives or hypotheses                                                                                                     | Whether objectives pertain to the cluster level, the individual participant level or both                                                                                                                          | 5                  |
| <b>Methods</b>                   |         |                                                                                                                                       |                                                                                                                                                                                                                    |                    |
| <b>Trial design</b>              | 3a      | Description of trial design (such as parallel, factorial) including allocation ratio                                                  | Definition of cluster and description of how the design features apply to the clusters                                                                                                                             | 6                  |
|                                  | 3b      | Important changes to methods after trial commencement (such as eligibility criteria), with reasons                                    |                                                                                                                                                                                                                    | Not applicable     |
| <b>Participants</b>              | 4a      | Eligibility criteria for participants                                                                                                 | Eligibility criteria for clusters                                                                                                                                                                                  | 6                  |
|                                  | 4b      | Settings and locations where the data were collected                                                                                  |                                                                                                                                                                                                                    | 6                  |
| <b>Interventions</b>             | 5       | The interventions for each group with sufficient details to allow replication, including how and when they were actually administered | Whether interventions pertain to the cluster level, the individual participant level or both                                                                                                                       | 8                  |
| <b>Outcomes</b>                  | 6a      | Completely defined pre-specified primary and secondary outcome measures, including how and when they were assessed                    | Whether outcome measures pertain to the cluster level, the individual participant level or both                                                                                                                    | 10 and Table 1     |
|                                  | 6b      | Any changes to trial outcomes after the trial commenced, with reasons                                                                 |                                                                                                                                                                                                                    | Not applicable     |
| <b>Sample size</b>               | 7a      | How sample size was determined                                                                                                        | Method of calculation, number of clusters(s) (and whether equal or unequal cluster sizes are assumed), cluster size, a coefficient of intracluster correlation (ICC or $k$ ), and an indication of its uncertainty | 12                 |
|                                  | 7b      | When applicable, explanation of any interim analyses and stopping guidelines                                                          |                                                                                                                                                                                                                    | Not yet applicable |



| Section/Topic                           | Item No | Standard Checklist item                                                                                                                                                                     | Extension for cluster designs                                                                                                                                                              | Page No *      |
|-----------------------------------------|---------|---------------------------------------------------------------------------------------------------------------------------------------------------------------------------------------------|--------------------------------------------------------------------------------------------------------------------------------------------------------------------------------------------|----------------|
| <b>Randomisation:</b>                   |         |                                                                                                                                                                                             |                                                                                                                                                                                            |                |
| <b>Sequence generation</b>              | 8a      | Method used to generate the random allocation sequence                                                                                                                                      |                                                                                                                                                                                            | 7, 8           |
|                                         | 8b      | Type of randomisation; details of any restriction (such as blocking and block size)                                                                                                         | Details of stratification or matching if used                                                                                                                                              | Not applicable |
| <b>Allocation concealment mechanism</b> | 9       | Mechanism used to implement the random allocation sequence (such as sequentially numbered containers), describing any steps taken to conceal the sequence until interventions were assigned | Specification that allocation was based on clusters rather than individuals and whether allocation concealment (if any) was at the cluster level, the individual participant level or both | 7              |
| <b>Implementation</b>                   | 10      | Who generated the random allocation sequence, who enrolled participants, and who assigned participants to interventions                                                                     | Replace by 10a, 10b and 10c                                                                                                                                                                | 7              |
|                                         | 10a     |                                                                                                                                                                                             | Who generated the random allocation sequence, who enrolled clusters, and who assigned clusters to interventions                                                                            | 7              |
|                                         | 10b     |                                                                                                                                                                                             | Mechanism by which individual participants were included in clusters for the purposes of the trial (such as complete enumeration, random sampling)                                         | 10             |
|                                         | 10c     |                                                                                                                                                                                             | From whom consent was sought (representatives of the cluster, or individual cluster members, or both), and whether consent was sought before or after randomisation                        | 8              |
|                                         |         |                                                                                                                                                                                             |                                                                                                                                                                                            |                |
| <b>Blinding</b>                         | 11a     | If done, who was blinded after assignment to interventions (for example, participants, care providers, those assessing outcomes) and how                                                    |                                                                                                                                                                                            | 8              |
|                                         | 11b     | If relevant, description of the similarity of interventions                                                                                                                                 |                                                                                                                                                                                            | Not applicable |
| <b>Statistical methods</b>              | 12a     | Statistical methods used to compare groups for primary and secondary outcomes                                                                                                               | How clustering was taken into account                                                                                                                                                      | 15             |
|                                         | 12b     | Methods for additional analyses, such as subgroup analyses and adjusted analyses                                                                                                            |                                                                                                                                                                                            | 15             |

| Section/Topic            | Item No | Standard Checklist item                                                                                          | Extension for cluster designs                                             | Page No *                                |
|--------------------------|---------|------------------------------------------------------------------------------------------------------------------|---------------------------------------------------------------------------|------------------------------------------|
| <b>Results</b>           |         |                                                                                                                  |                                                                           | Not yet applicable (protocol manuscript) |
| <b>Discussion</b>        |         |                                                                                                                  |                                                                           |                                          |
| <b>Limitations</b>       | 20      | Trial limitations, addressing sources of potential bias, imprecision, and, if relevant, multiplicity of analyses |                                                                           | 18                                       |
| <b>Generalisability</b>  | 21      | Generalisability (external validity, applicability) of the trial findings                                        | Generalisability to clusters and/or individual participants (as relevant) | 18,19                                    |
| <b>Interpretation</b>    | 22      | Interpretation consistent with results, balancing benefits and harms, and considering other relevant evidence    |                                                                           | Not yet applicable                       |
| <b>Other information</b> |         |                                                                                                                  |                                                                           |                                          |
| <b>Registration</b>      | 23      | Registration number and name of trial registry                                                                   |                                                                           | 1                                        |
| <b>Protocol</b>          | 24      | Where the full trial protocol can be accessed, if available                                                      |                                                                           | 1                                        |
| <b>Funding</b>           | 25      | Sources of funding and other support (such as supply of drugs), role of funders                                  |                                                                           | 20                                       |

\* Page numbers: as seen in the document "draft\_Proof\_hi.pdf" (which has 34 pages)

# BMJ Open

## Does an innovative paper-based health information system (PHISICC) improve data quality and use in primary health care? Protocol of a multi-country, cluster randomised controlled trial in Sub-Saharan African rural settings.

|                                 |                                                                                                                                                                                                                                                                                                                                                                                                                                                                                                                                                                                                                                                                                                                                                                                                                                                                                                                                                                                                                                                                                                                                                                                                                                                                                                                                                                                                                                                             |
|---------------------------------|-------------------------------------------------------------------------------------------------------------------------------------------------------------------------------------------------------------------------------------------------------------------------------------------------------------------------------------------------------------------------------------------------------------------------------------------------------------------------------------------------------------------------------------------------------------------------------------------------------------------------------------------------------------------------------------------------------------------------------------------------------------------------------------------------------------------------------------------------------------------------------------------------------------------------------------------------------------------------------------------------------------------------------------------------------------------------------------------------------------------------------------------------------------------------------------------------------------------------------------------------------------------------------------------------------------------------------------------------------------------------------------------------------------------------------------------------------------|
| Journal:                        | <i>BMJ Open</i>                                                                                                                                                                                                                                                                                                                                                                                                                                                                                                                                                                                                                                                                                                                                                                                                                                                                                                                                                                                                                                                                                                                                                                                                                                                                                                                                                                                                                                             |
| Manuscript ID                   | bmjopen-2021-051823.R1                                                                                                                                                                                                                                                                                                                                                                                                                                                                                                                                                                                                                                                                                                                                                                                                                                                                                                                                                                                                                                                                                                                                                                                                                                                                                                                                                                                                                                      |
| Article Type:                   | Protocol                                                                                                                                                                                                                                                                                                                                                                                                                                                                                                                                                                                                                                                                                                                                                                                                                                                                                                                                                                                                                                                                                                                                                                                                                                                                                                                                                                                                                                                    |
| Date Submitted by the Author:   | 02-Jun-2021                                                                                                                                                                                                                                                                                                                                                                                                                                                                                                                                                                                                                                                                                                                                                                                                                                                                                                                                                                                                                                                                                                                                                                                                                                                                                                                                                                                                                                                 |
| Complete List of Authors:       | <p>Bosch-Capblanch, Xavier; Swiss Tropical and Public Health Institute; University of Basel</p> <p>Oyo-Ita, Angela; University of Calabar, Department of Community Medicine</p> <p>Muloliwa, Artur; Lurio University Faculty of Health Sciences</p> <p>Yapi, Richard; Centre Suisse de Recherches Scientifiques en Côte d'Ivoire</p> <p>Auer, Christian ; Swiss Tropical and Public Health Institute; University of Basel</p> <p>Samba, Mamadou; Ministère de la Santé et de l'Hygiène Publique</p> <p>Gajewski, Suzanne; Swiss Tropical and Public Health Institute; University of Basel</p> <p>Ross, Amanda; Swiss Tropical and Public Health Institute; University of Basel</p> <p>Krause, L Kendall; Bill &amp; Melinda Gates Foundation</p> <p>Ekpenyong, Nnette; University of Calabar Teaching Hospital, Department of Community Medicine</p> <p>Nwankwo, Ogonna; University of Calabar, Department of Community Medicine</p> <p>Njepuome, Anthonia; Swiss Tropical and Public Health Institute</p> <p>Lee, Sofia; Swiss Tropical and Public Health Institute</p> <p>Sacarlal, Jahit ; Eduardo Mondlane University, Faculty of Medicine</p> <p>Madede, Tavares; Universidade Eduardo Mondlane</p> <p>Berté, Salimata; Centre Suisse de Recherches Scientifiques en Côte d'Ivoire</p> <p>Matsinhe, Graça; Ministério da Saúde</p> <p>Garba, Abdullahi; National Primary Healthcare Development Agency</p> <p>Brown, David; BCGI LLC / pivot-23.5°</p> |
| <b>Primary Subject Heading</b>: | Health services research                                                                                                                                                                                                                                                                                                                                                                                                                                                                                                                                                                                                                                                                                                                                                                                                                                                                                                                                                                                                                                                                                                                                                                                                                                                                                                                                                                                                                                    |
| Secondary Subject Heading:      | Global health, Health policy, Research methods                                                                                                                                                                                                                                                                                                                                                                                                                                                                                                                                                                                                                                                                                                                                                                                                                                                                                                                                                                                                                                                                                                                                                                                                                                                                                                                                                                                                              |
| Keywords:                       | Human resource management < HEALTH SERVICES ADMINISTRATION & MANAGEMENT, Organisation of health services < HEALTH SERVICES ADMINISTRATION & MANAGEMENT, Protocols & guidelines < HEALTH SERVICES ADMINISTRATION & MANAGEMENT, Quality in health care <                                                                                                                                                                                                                                                                                                                                                                                                                                                                                                                                                                                                                                                                                                                                                                                                                                                                                                                                                                                                                                                                                                                                                                                                      |

1  
2  
3  
4  
5  
6  
7  
8  
9  
10  
11  
12  
13  
14  
15  
16  
17  
18  
19  
20  
21  
22  
23  
24  
25  
26  
27  
28  
29  
30  
31  
32  
33  
34  
35  
36  
37  
38  
39  
40  
41  
42  
43  
44  
45  
46  
47  
48  
49  
50  
51  
52  
53  
54  
55  
56  
57  
58  
59  
60

|  |                                                                                          |
|--|------------------------------------------------------------------------------------------|
|  | HEALTH SERVICES ADMINISTRATION & MANAGEMENT, STATISTICS & RESEARCH METHODS, PRIMARY CARE |
|  |                                                                                          |

SCHOLARONE™  
Manuscripts



I, the Submitting Author has the right to grant and does grant on behalf of all authors of the Work (as defined in the below author licence), an exclusive licence and/or a non-exclusive licence for contributions from authors who are: i) UK Crown employees; ii) where BMJ has agreed a CC-BY licence shall apply, and/or iii) in accordance with the terms applicable for US Federal Government officers or employees acting as part of their official duties; on a worldwide, perpetual, irrevocable, royalty-free basis to BMJ Publishing Group Ltd ("BMJ") its licensees and where the relevant Journal is co-owned by BMJ to the co-owners of the Journal, to publish the Work in this journal and any other BMJ products and to exploit all rights, as set out in our [licence](#).

The Submitting Author accepts and understands that any supply made under these terms is made by BMJ to the Submitting Author unless you are acting as an employee on behalf of your employer or a postgraduate student of an affiliated institution which is paying any applicable article publishing charge ("APC") for Open Access articles. Where the Submitting Author wishes to make the Work available on an Open Access basis (and intends to pay the relevant APC), the terms of reuse of such Open Access shall be governed by a Creative Commons licence – details of these licences and which [Creative Commons](#) licence will apply to this Work are set out in our licence referred to above.

Other than as permitted in any relevant BMJ Author's Self Archiving Policies, I confirm this Work has not been accepted for publication elsewhere, is not being considered for publication elsewhere and does not duplicate material already published. I confirm all authors consent to publication of this Work and authorise the granting of this licence.

## Title

Does an innovative paper-based health information system (PHISICC) improve data quality and use in primary health care? Protocol of a multi-country, cluster randomised controlled trial in Sub-Saharan African rural settings.

## Authors

- Xavier Bosch-Capblanch. Corresponding author. Swiss Tropical and Public Health Institute. Basel, Switzerland. And University of Basel, Basel, Switzerland. x.bosch@unibas.ch
- Angela Oyo-Ita. Department of Community Medicine, University of Calabar, Calabar, Nigeria. oyo\_ita@yahoo.com
- Artur Manuel Muloliwa. Faculty of Health Sciences, Lúrio University, Nampula, Mozambique. muloliwa@yahoo.com.br
- Richard B Yapi. Centre Suisse de Recherches Scientifiques en Côte d'Ivoire, Abidjan, Côte d'Ivoire. And Centre d'Entomologie Médicale et Vétérinaire, Université Alassane Ouattara, Bouaké, Côte d'Ivoire. richard.yapi@csrs.ci
- Christian Auer. Swiss Tropical and Public Health Institute. Basel, Switzerland. And University of Basel, Basel, Switzerland. christian.auer@swisstph.ch
- Mamadou Samba. Ministère de la Santé et de l'Hygiène Publique, Abidjan, Côte d'Ivoire. And Université Félix Houphouët Boigny, Abidjan, Côte d'Ivoire. samba.mamadou@gmail.com
- Suzanne Gajewski. Swiss Tropical and Public Health Institute. Basel, Switzerland. And University of Basel, Basel, Switzerland. suzanne.gajewski@swisstph.ch
- Amanda Ross. Swiss Tropical and Public Health Institute. Basel, Switzerland. And University of Basel, Basel, Switzerland. amanda.ross@swisstph.ch
- L Kendall Krause. Bill & Melinda Gates Foundation, Seattle, USA. Kendall.Krause@gatesfoundation.org
- Nnette Ekpenyong. Department of Community Medicine, University of Calabar Teaching Hospital, Calabar, Nigeria. And Department of Community Medicine University of Calabar, Calabar, Nigeria. nnekon2015@gmail.com
- Ogonna Nwankwo. Swiss Tropical and Public Health Institute, Basel, Switzerland. And University of Basel, Basel, Switzerland. And Health Policy, Management and Economics Firm, Department of Community. Medicine, University of Calabar, Calabar, Nigeria. ogonna.nwankwo@swisstph.ch
- Anthonia Ngozi Njepuome. Swiss Tropical and Public Health Institute, Abuja, Nigeria. ngonjep@yahoo.com
- Sofia Mandjate Lee. Swiss Tropical and Public Health Institute; Manhiça, Mozambique. sofia\_mandjate@yahoo.com.br
- Jahit Sacarlal. Faculty of Medicine, Eduardo Mondlane University, Maputo, Mozambique. jahityash2002@gmail.com
- Tavares Madede. Department of Community Health, Faculty of Medicine, Eduardo Mondlane University, Maputo, Mozambique. tmadede@gmail.com
- Salimata Berté. Centre Suisse de Recherches Scientifiques en Côte d'Ivoire, Abidjan, Côte d'Ivoire. sali.berte@csrs.ci
- Graça Matsinhe. Expanded Program on Immunization, Ministry of Health, Maputo, Mozambique. gmatsinhe@gmail.com.
- Abdullahi Bulama Garba. Director Planning, Research and Statistics, National Primary Health Care Development Agency, Abuja, Nigeria. ab.garba@nphcda.gov.ng.
- David W Brown. Managing Principal, BCGI LLC / pivot-23.5°, North Carolina, USA. david.brown@pivot235.org

## Abstract

### Introduction

Frontline health workers in remote health facilities are the first contact of the formal health sector and are confronted with life-saving decisions. Health information systems (HIS) support the collection and use of data. However, HIS focus on reporting and are unfit to support decisions. Since data tools are paper-based in most primary health care settings, we have produced an innovative paper-based HIS (PHISICC) using a Human Centred Design approach. We are carrying out a cluster-randomised controlled trial in three African countries to assess the effects of PHISICC compared with the current systems.

### Methods and analysis

Study areas are in rural zones of Côte d'Ivoire, Mozambique and Nigeria. Seventy health facilities in each country have been randomly allocated to using PHISICC tools or to continuing to use the regular HIS tools. We have randomly selected households in the catchment areas of each health facility to collect outcomes' data. The baseline survey has been carried out in two of the three countries, the end-line survey is planned for mid-2021. Primary outcomes include data quality and use and coverage of health services and health workers satisfaction; secondary outcomes are additional data quality and use parameters, childhood mortality and additional health workers and clients experience with the system. Just prior to the implementation of the trial we had to relocate the studies in Mozambique and Côte d'Ivoire due to unforeseen logistical issues. The effects of the intervention will be estimated using regression models and accounting for clustering using random effects.

### Ethics and dissemination

Ethics committees in Côte d'Ivoire, Mozambique and Nigeria approved the trials. We plan to disseminate our findings, data and research materials among researchers and policy makers. We aim at having our findings included in systematic reviews on health systems interventions and future guidance development on the matter.

### Registration

Pan African Clinical Trials Registry - PACTR201904664660639. Registered 01/04/2019,  
<https://pactr.samrc.ac.za/Search.aspx>.

## Article summary

### Strengths and limitations of the study

- These trials assess the effects of improving paper-based health information systems, which are greatly used particularly in remote, rural areas but which are neglected in research.
- The paper-based interventions have been developed using a Human Centred Design approach, with frontline health workers and designers driving the co-creation process.
- Despite the complexity of health systems interventions, we have applied robust experimental methods, together with qualitative research, to assess and understand the effects of the paper-based intervention. Robust evidence on health systems is more likely to gain the credibility of policy-makers and to make it into systematic reviews, guidance development and policy and practice.
- Research targeting frontline health workers in remote, rural areas has to take place where they live and work, which poses serious obstacles in the organisation, management and monitoring of the trials.
- These obstacles, aggravated by the COVID-19 pandemic, have challenged the mobility of the research team, the availability of the intervention in one of the countries and the duration of the trials.



## Introduction

Frontline health workers (HW) in remote, rural health facilities (HF) in many countries are the first contact with the formal health sector of the population and they are confronted with life-saving clinical and public health decisions on a daily basis. Decisions are made by exerting a balanced judgment on the information related to health care events, such as making the correct diagnoses or deciding on which vaccinations a child should receive on a given day. In order to properly handle this information, appropriate data support tools and processes are required, referred to as the health information system (HIS); or Routine HIS or Health Management Information System [1]. In reality, though, HIS are primarily designed to report aggregated health events to the higher tiers of the health systems rather than to inform decision-making at the point of care [2].

Increasing pressure by donors and governments to collect more and more data has aggravated the situation, through the proliferation of data support tools that have overloaded frontline health workers compromising their capacity to deliver good quality of care and to delivery good quality data [3], for higher level decision-making.

Promising 'quick fixes', such as the scale up of digital HIS, are taking a long time to implement and face enormous challenges related to infrastructure, equipment and services necessary to run them. Besides, research evidence on the effects of digital solutions remains patchy and inconsistent, even in high-income country settings, where complaints about computerisation of clinical care have been raised [4,5]. Hence, it is very likely that paper tools will remain a primary, if not unique, data support mechanism particularly in remote, rural HF in many countries.

PHISICC (Paper-based Health Information System in Comprehensive Care) is a multi-year, multi-country, mixed-methods research project that aims at producing and testing an innovative paper-based HIS to improve data quality and use, decision making and health outcomes, at Primary Health Care (PHC). It is being carried out in selected areas within Côte d'Ivoire, Mozambique and Nigeria. The project started in 2015, producing a systematic review on the effects of HIS interventions [6,7]

1  
2  
3 and a framework synthesis on how HIS are understood in the literature in order to learn from past  
4 experiences in HIS developments. This global evidence was coupled with studies to characterise the  
5 existing HIS in the three countries, to understand how health workers interact with the HIS and to  
6 identify entry points for HIS design improvements. With these bodies the research team was well  
7 equipped to engage into a Human Centred Design (HCD) co-creative process with frontline HW to  
8 design an innovative HIS (PHISICC). See Figure 1 for an illustration of the structure, processes and  
9 evidence flow within PHISICC.

10  
11  
12  
13  
14  
15  
16  
17  
18  
19 The impact of the PHISICC HIS on data quality and use, quality of health care and HW perceptions is  
20 being assessed concurrently in rural areas in the three countries. We describe the design of the trial  
21 here, consistent with CONSORT reporting guidelines [8] and the extension for cluster randomised  
22 controlled trials (CRCT) [9]; see Additional file 1.

## 23 24 25 26 27 28 29 **Methods**

### 30 31 32 **Aim**

33  
34  
35 The aim of the trial is to address the research question: what are the effects of an innovative paper-  
36 based HIS (PHISICC) on data use and quality, quality of health and HW perceptions compared with  
37 the current HIS, in rural PHC settings?  
38  
39  
40  
41  
42

### 43 44 **Patient and public involvement**

45  
46 There was no public or patient involvement in the design of the study or selection of study areas  
47 because the intervention being assessed in these trials target health care providers and decision-  
48 makers, rather than patients or the public in general. Population in the catchment area of selected  
49 health facilities, potentially using their services, were only approached in order to assess the studies  
50 outcomes.  
51  
52  
53  
54

55  
56 On the other hand, we have involved health systems stakeholders and frontline health workers.

57  
58  
59 Ministries of Health at several levels participated in the preparation of the research proposal  
60

1  
2  
3 (personal consultations), in the characterisation of health information systems that preceded the  
4 trials (countries workshops), and throughout all project components (additional workshops,  
5 newsletters and personal communication). Frontline health workers in the three countries have co-  
6 created the intervention (i.e. paper based tools) through workshops, personal feedback and piloting  
7 under real live conditions. Some of them are part of the research team and co-authoring this  
8 manuscript.  
9  
10  
11  
12  
13  
14  
15  
16

### 17 **Study design**

18  
19 The study is a CRCT in each of the three countries. In each setting, 70 health facilities are randomised  
20 to intervention or control (35 per arm). The intervention arm HF use the new PHISICC tools  
21 (substituting the usual HIS tools) and the control arm HF use the regular HIS tools. The trial is  
22 implemented in the real life contexts of HF carrying out their usual duties.  
23  
24  
25  
26  
27  
28

29 The trials started between the end of 2019 and beginning of 2020, depending on the country, when  
30 the intervention was installed and the baseline surveys carried out. Data collection will last until mid-  
31 2021.  
32  
33  
34  
35  
36

### 37 **Study areas**

38  
39 Ministries of Health (MOH) officials in several countries were contacted before submitting the  
40 proposal to the funding agency in order to explore the willingness to engage in a project focusing on  
41 paper-based tools. Officials in several countries rejected the offer on the grounds of upcoming  
42 digitalisation plans of the HIS in the country. We partnered with MOH that found the research  
43 relevant to their context in three countries.  
44  
45  
46  
47  
48  
49

50 In each country, the eligibility criteria of study areas were that they had to belong to the operational  
51 area of research partners; contain a large enough number of health facilities and their catchment  
52 population; include vulnerable population (e.g. with low vaccination coverage, high childhood  
53 mortality); and be comparatively neglected in terms of infrastructure and services. We excluded  
54 areas with concurrent research or other types of activities that could conflict with the CRCT (such as  
55  
56  
57  
58  
59  
60

1  
2  
3 the co-existence of another health-related study, massive developments in infrastructure or activities  
4 involving migration of the population, such as temporary work sites or changes in working sites) and  
5 areas with threats to safety or security that could jeopardise research activities.  
6  
7  
8

9  
10 The study areas are located in Adzopé, Agboville, Tiassalé and Sikensi districts (Côte d'Ivoire); in  
11 Funhalouro, Govuro, Homoine, Inhambane, Inharrime, Inhassoro, Mabote, Maxixe and Panda  
12 (Inhambane province, Mozambique); and in Yala Local Government Authority (Cross River State,  
13  
14  
15  
16  
17  
18  
19  
20  
21  
22  
23  
24  
25  
26  
27  
28  
29  
30  
31  
32  
33  
34  
35  
36  
37  
38  
39  
40  
41  
42  
43  
44  
45  
46  
47  
48  
49  
50  
51  
52  
53  
54  
55  
56  
57  
58  
59  
60

### Eligibility of health facilities

The intervention is implemented at the HF level. The eligibility criteria of the HF were that they had to be located in the study areas, belong to the governmental health sector and their main activity should be the delivery of PHC services. HF were excluded if they had specialised clinical services, inpatients, physicians providing care or with plans for staff turn-over involving intervention and control HF.

A 'master list' of eligible health facilities was prepared based on information provided by the MOH across all study areas. We aimed at selecting 70 of the eligible HF in each country, using simple random techniques in R [10]. See in Figure 2 the selection and allocation trial flow chart.

### Allocation and blinding

Allocation of the 70 HF per country into the intervention and control arms took place in a formal event, gathering research partners and MOH officials to offer transparency and promote study ownership by local and national authorities. Equally sized, folded pieces of paper with the names and codes of included HF written on them were introduced in an opaque receptacle where they were manually and blindly mixed. A second receptacle contained two equally sized pieces of paper, one with the word 'intervention' and another one with the word 'control'. A selected person in the meeting, not belonging to the research team, extracted one piece of paper at a time to reach half the number of included HF. Then, a paper was extracted from the second receptacle to assign those HF

1  
2  
3 to the intervention or control arms. The rest of the papers were extracted as well to verify  
4  
5 completeness and no duplication of names, and those HF assigned to the other arm.  
6

7  
8 Once HF were selected, all villages or settlements for each health facility catchment area were listed  
9  
10 and three in each catchment area were selected. In practice, we selected all villages because the  
11  
12 numbers were below (in Côte d'Ivoire) or just above (in Nigeria) the needs. For each village, we used  
13  
14 Google satellite maps to identify and geo-locate every visible roof. Where there were many houses  
15  
16 per village (roughly, more than fifty or so), a researcher would mark four points in the map slightly  
17  
18 beyond the northernmost, southernmost, easternmost and westernmost roofs seen and 30 random  
19  
20 points were selected within that square. From the mapped points, 10 per village (with 10 more acting  
21  
22 as reserve) were randomly selected and marked on another map used in the field for data collectors  
23  
24 to approach households. Where technical problems impeded this approach in a given village, a field  
25  
26 supervisor would rotate a bottle on the floor towards the centre of the village and would select at  
27  
28 random 10 households in the direction pointed by the bottle, from the outer limit of the village till  
29  
30 the centre [11].  
31  
32  
33

34  
35 Blinding is only feasible for the research team members carrying out the CRCT data collection and the  
36  
37 analyses of the CRCT findings. The intervention (i.e. paper tools) are by design very different from the  
38  
39 existing system and it is not possible to blind participants or principal researchers.  
40

41  
42 We already had the agreement of the MOH and selected HF compliant with the inclusion criteria  
43  
44 were provided with the intervention shortly after completing the baseline data collection. Therefore,  
45  
46 recruitment as such took place at the same time of the allocation of HF into intervention and control  
47  
48 arms.  
49

## 50 51 **The intervention**

52  
53 The PHISICC paper-based intervention is a full set of paper-based tools to support decision-making by  
54  
55 frontline HW. These are the only tools to be used by HW in the intervention arm. The PHISICC tools  
56  
57 encompass the whole system (i.e. recording and reporting) and all clinical and public health care  
58  
59  
60

1  
2  
3 areas and are characterised by: a common visual language (e.g. spaces for digits and text),  
4  
5 standardised formats across health care areas; support to critical data items (e.g. respiratory rate in  
6  
7 infants); graphic artefacts to distinguish severity degrees of signs or symptoms; documentation of  
8  
9 diagnoses and treatment decisions; and aides memoires, among others.

10  
11  
12 The PHISICC tools have been developed from May 2017 till June 2019, including production, using a  
13  
14 Human Centred Design approach [12]. A strength of the Human Centred Design approach is its ability  
15  
16 to unlock the user's perspective so that designers can build solutions that are fully reality-based and  
17  
18 work well. Co-creation groups were formed in each country with researchers, staff from partner  
19  
20 institutions and healthcare workers, led by a team of professional designers. Research team  
21  
22 members supervised and coordinated exclusively the feedback on the contents of the tools, to  
23  
24 ensure compliance with each country clinical guidelines. At the outset of the process, the design  
25  
26 focused on three health care areas (i.e. antenatal care, vaccination and sick child) and slowly  
27  
28 extended the new visual language to other health care areas. Initial workshops served to brainstorm  
29  
30 on problems and potential design solutions, without any other rule than being comprehensive and  
31  
32 not rejecting a single idea. Designers, then, formalised some of the most promising solutions and a  
33  
34 first round of exchanges within the co-creation team was used to address misinterpretations or  
35  
36 inconsistencies. There were two in-the-field testing rounds in Mozambique, two in Côte d'Ivoire and  
37  
38 three in Nigeria and uncountable exchanges through teleconferences and email, in-between. The  
39  
40 prototypes were considered final when no errors were detected, were compliant with data needs in  
41  
42 each country and comments from the field could not be accommodated in the design concept or  
43  
44 there was no consensus on minor or formal issues being raised.

45  
46  
47 The PHISICC tools have been produced in French for Côte d'Ivoire, in Portuguese for Mozambique  
48  
49 and in English for Nigeria, which are the official languages used in the health systems in the three  
50  
51 countries. They include the official logo of the MOHs. Health care areas covered include: family  
52  
53 planning, antenatal care, including tetanus toxoid vaccination, delivery, post-natal care, vaccination,  
54  
55  
56  
57  
58  
59  
60

1  
2  
3 sick child, adults outpatient consultation, tuberculosis diagnosis and treatment, and HIV. Referral  
4  
5 forms were also designed.  
6

7  
8 The PHISICC tools have three sub-components: registers, tallies and reports. Registers are formed by  
9  
10 seven DIN-A3 and one DIN-A4 (for referrals) book covering all health care areas except for  
11  
12 tuberculosis treatment, for which DIN-A3 cards were used. Register books have 100, 200 or 400  
13  
14 pages depending on the country and health care area. They are used to record individual clients' data  
15  
16 for each health care event, either of clinical or public health nature. Some register books have clinical  
17  
18 notes at the very beginning, as 'aide memoires', and an example of a filled-in form, to assist HW  
19  
20 when doubting how to proceed.  
21  
22

23  
24 Tallies are DIN-A3 single sheets which contain a list of the indicators to be transferred to higher levels  
25  
26 of the health system, with a series of small ovals, grouped in fives, to mark with tally sticks with a  
27  
28 pen. In contrast to the current systems that have no tallies or only for vaccination, tallies were  
29  
30 created for all health care areas. In the middle-right side of the tally, a column accommodates cells  
31  
32 aligned with the ovals to insert the count for each indicator; and in the far right of the sheet there is  
33  
34 a replica of the count column, separated with a perforated line, which is detached and sent, as part  
35  
36 of the monthly report to the higher level in the health system.  
37  
38

39  
40 While current HIS tools are consistently organised in tabular formats and books, where each clinical  
41  
42 event is recorded in a row and each variable (e.g. age, gender, HIV status, diagnosis) in a column,  
43  
44 PHISICC tools incorporated several innovations; in summary: a visual language to guide the clinical  
45  
46 decisions of health workers based on severity (i.e. if it is recorded that a child has convulsions, a  
47  
48 visual artefact indicates severity), more space for clinical data (e.g. vital signs), inclusion of all critical  
49  
50 information to assess patients (e.g. obstetric history, gestational age, fundus height, breath rate in  
51  
52 infants), consolidation of information of all antenatal care visits for a single pregnant woman in the  
53  
54 same page, among many other formal and contents improvements, including improved aesthetics.  
55  
56

57  
58 We aimed at creating "a system" (not just some tools) focusing on decision making by frontline  
59  
60 health workers. The epidemiological and public health contexts in the three countries are similar, as

1  
2  
3 confirmed by the similarities in the existing HIS between the three. The visual language and the  
4  
5 recording forms were common to the three countries because clinical decisions are common to the  
6  
7 three; although forms allowed for specific tests or treatments. The reporting component was  
8  
9 adapted to each country set of indicators, although the visual language and reporting processes were  
10  
11 harmonised.  
12

13  
14 During three or four days, HW were trained on HIS before the start of the trial. In the intervention  
15  
16 arm they were trained on the PHISICC tools; and the control arm received a refresher training about  
17  
18 the regular tools, during the same number of days.  
19

20  
21 Additionally, given that the regular tools already contained information on past vaccination history of  
22  
23 children still to complete their vaccination schedule, we created a mechanism to retrieve data of  
24  
25 children's vaccination status to transcribe into the new vaccination register book in the intervention  
26  
27 arm ('system transition').  
28

29  
30 Tools were endorsed by MOH, printed in local printing companies and distributed to HW at the end  
31  
32 of the training sessions. A digital spreadsheet was created to monitor consumption and order  
33  
34 additional tools to cover health facility needs during the life of the trial.  
35  
36

### 37 38 **Outcomes**

39  
40 There are five primary outcomes (Table 1). Vaccination adherence is defined as the total number of  
41  
42 vaccine doses given in the correct time interval to children in households in the health facilities  
43  
44 catchment villages of those over the total number of vaccine doses that should have been given  
45  
46 during the same period. Antenatal care visits uptake will also be considered depending on the  
47  
48 expected number of pregnancies in the study areas. Both are used as proxies for health outcomes in  
49  
50 terms of protection against disease [13] and prevention of pregnancy complications [14] and are  
51  
52 assessed in a random sample of households in the health facilities catchment areas. Data  
53  
54 concordance is defined as the level of agreement of HIS indicators between (i) records of health care  
55  
56 events (re-counts), (ii) tallies (re-counts) and (iii) reports (aggregated data to higher levels of the  
57  
58  
59  
60



1  
2  
3 system) [3]. The appropriateness of treatment will be measured using the diagnostics scope in the  
4  
5 sick child (i.e. number of different diagnoses per sick child consultation); and treatment  
6  
7 appropriateness (i.e. number of prescribed treatments that are supported by a documented  
8  
9 diagnosis). These outcomes will be assessed in a random sample of records and corresponding  
10  
11 reports during the last four months of the study period. Health workers satisfaction will be assessed  
12  
13 in all health workers in included health facilities using a standardised questionnaire [15,16,17].  
14

15  
16 While the intervention targets HF, some of the outcomes are measured at the level of HF, and some  
17  
18 from patients clustered within HF catchment areas.  
19

20  
21 Secondary outcomes are classified under the following domains: data quality, data use, mortality,  
22  
23 HW experience, client experience and resource consumption:  
24

- 25  
26 • Data quality, assessed in a sample of records
  - 27  
28 ○ Completeness of recording and reporting in specific forms; i.e. prevalence of unduly  
29  
30 missing data items; partograph used;
  - 31  
32 ○ accuracy of recorded figures in comparison to real events (e.g. physical counting of  
33  
34 commodities, such as number of 500mg Paracetamol tablets as recorded versus  
35  
36 number of 500mg Paracetamol tablets as counted);
  - 37  
38 ○ timeliness of reporting, as documented by time stamps in forms;
  - 39  
40 ○ loss of data or data which does not reach the next upper administrative level.  
41  
42  
43  
44  
45  
46  
47  
48  
49  
50  
51  
52  
53  
54  
55  
56  
57  
58  
59  
60

- Data use, assessed in a sample of records
  - in terms of knowledge (e.g. vaccines due based on date of birth; weight for length assessments);
  - cases of different conditions properly treated in (e.g. diarrhoea cases given oral rehydration therapy according to national guidelines; pneumonia cases given appropriate antibiotic according to national guidelines;
  - public health decisions: availability of lost to follow up lists or plans for vaccination, tuberculosis and or HIV/AIDS treatment control;
  - occurrence of stock outs of essential drugs.
- Overall under-5s mortality and under-5s mortality excluding peri-natal mortality [18], in a sample of households in health facilities catchment areas.
- Health workers' 'human experience' and satisfaction (all health workers).
- District health information officers' 'human experience' (selected health care programme managers).
- Clients' 'human experience' and satisfaction, in a sample of households in health facilities catchment areas.
- Resources consumption (e.g. time use, costs)
  - intervention costs: tools, training, start-up;
  - time used for recording and reporting (e.g. time-motion study) [19];
  - cost-effectiveness per unit of additional improvement in outcomes of interest.

It is worthwhile to note that outcomes that do not relate to data quality and use will be assessed using additional data collection tools (e.g. survey questionnaires), which are the same for intervention and control health facilities. Hence, the effects of the intervention cannot be attributed to the changes in performance of the paper tools routinely used to record health care events in intervention and control health facilities, which are different by design.

1  
2  
3 In addition, we will consider ‘explanatory outcomes’ that will help to understand how the measured  
4 effects have taken place and why. We will look at the details of the interplay between the  
5 intervention, the system, the users and the context. Process indicators will be based on the  
6 documented activities that have taken place, from the conception of the intervention, up to its  
7 implementation, monitoring and evaluation. Process indicators may include: intervention set up and  
8 implementation, monitoring of the use of the intervention, special activities targeted at vulnerable  
9 populations, district reactions related to the intervention, handling of data coming from the new  
10 system, sustainability based on costs information and perceptions, alignment with national health  
11 policies and donor priorities. We will also explore health care services characteristics looking at  
12 generic indicators from health facilities, such human resources profiles and relations with the  
13 communities, population characteristics and system and context characteristics captured in early  
14 stages of the project, where data are available.

### 31 **Sample size calculations**

32  
33 The required sample sizes for each primary outcome were determined using simulation to  
34 incorporate the clustering easily (Table 1) and to take the baseline and end-line surveys into account.  
35 Briefly, we simulated 1000 trials with variation between them caused by drawing different samples  
36 from the same distributions. We then used the regression models detailed in the data section to  
37 analyse each of the simulated trials and estimate the power as the proportion of trials which  
38 detected the effect of the intervention as significant. The simulation code was written in R  
39 (supplementary files 1 and 2).

40  
41 For each country, we require the probability of  $\alpha$ , a type I error (rejecting the null hypothesis when it  
42 is actually true) to be less 0.05 and the power to be at least 80%.

43  
44 For vaccination adherence, using a sample size of 35 HF per arm, we would have 80% power in each  
45 country to detect as significant a difference between a proportion of due vaccines given from 75% in  
46 the control to 85% in the intervention arm, assuming one child per household, 30 households per HF  
47  
48  
49  
50  
51  
52  
53  
54  
55  
56  
57  
58  
59  
60

1  
2  
3 and a between-HF variation equivalent to a  $k$  of 0.25, where  $k$  is equal to the standard deviation  
4  
5 divided by the mean. The value of  $k$  is unknown, but was chosen in line with general observations by  
6  
7 Hayes and Bennet [20].  
8

9  
10 For data quality outcomes, with 35 HF per arm we would be able to detect as significant a difference  
11  
12 from a ratio of 0.7 (reported : recorded) vaccinations in the control arm to 0.8 with the intervention  
13  
14 with 80% power, assuming 100 recorded vaccinations per HF and a standard deviation of 0.25 in the  
15  
16 ratios between HF.  
17

18  
19 In terms of diagnostic scope, we would be able to detect an increase in the proportion of child-visits  
20  
21 with more than one diagnosis from 30% to 35% with 80% power with 35 HF per arm, 60 records per  
22  
23 HF and assuming a  $k$  of 0.25.  
24

25  
26 We would be able to detect as significant an increase from 50% of treatments having a  
27  
28 corresponding appropriate diagnosis to 60% with 80% power assuming 35 HF per arm, 1 treatment  
29  
30 per child, 25 children per HF and variation between HF corresponding to  $k = 0.25$ .  
31

32  
33 For the outcome related to health workers' satisfaction, we would be able to detect as significant an  
34  
35 increase from 50% of health workers satisfied to 75%, with 80% power assuming 35 HF, three health  
36  
37 workers per HF and a variation between HF equivalent to  $k = 0.25$ . Since this variable is measured in  
38  
39 the end-line survey only, we used the formula in Hayes and Bennet [20].  
40

41  
42 In summary, in each country we require 35 HF per arm, three HW per HF, 100 vaccination records  
43  
44 per HF, 60 sick child records per health facility and 30 children per health facility catchment area.  
45  
46  
47

#### 48 **Data collection and management**

49  
50 Data collection took place at baseline and will take place again at the end of the study. Data is  
51  
52 collected from health facilities, from the households in the catchment areas of the included health  
53  
54 facilities and also from district offices.  
55

56  
57 For data quality and data use outcomes, HF registers, tallies and reports will be scrutinised. For  
58  
59 population based outcomes, we carry out household surveys at baseline and at end-line. We use  
60

1  
2  
3 standard approaches for these types of surveys [21]. Households are visited, the research project is  
4  
5 briefly introduced and consent requested. Ideally, mothers of alive children or women in child-  
6  
7 bearing age were interviewed in order to obtain information on living children (i.e. vaccination  
8  
9 history) and death events, respectively, using home-based records if available and accessible.  
10  
11 Patients' satisfaction will be assessed using the PSQ-18 satisfaction questionnaire [22,23,24].  
12  
13 Essentially, the tool enables practitioners to investigate the extent to which their health care service  
14  
15 meets the perceived needs of their client group and pinpoint areas for improvement [24]. The  
16  
17 interview will be conducted with consenting patients as close to their care encounter as possible  
18  
19 [25]. Data tools are translated into the official languages of the study countries and pilot tested for  
20  
21 consistent meaning and relevance to the setting. Data collectors are also able to communicate in  
22  
23 local languages. The Satisfaction of Employees in Health Care (SEHC) survey is a validated tool to  
24  
25 assess staff satisfaction. It was first developed and validated in a low-income country (Ethiopia) [26]  
26  
27 and later successfully validated in a high-income country (USA) [27].  
28  
29

30  
31 We use a mix of paper and electronic data (ODK [28]) collection tools. Data collectors are trained to  
32  
33 minimise error. Tools are piloted before implementing. ODK data is regularly stored and sent to  
34  
35 secure servers, as soon as data collectors reach their office base. Data from paper tools is double  
36  
37 entered and compared and sent to secure servers. Each data collection tool has its corresponding  
38  
39 electronic database that is cleaned and submitted to the analyses. All data is anonymised at the point  
40  
41 of data collection or as soon as possible in the data management process. Data is labelled with an  
42  
43 arm code (e.g. 'A' or 'B') without any further information allowing to disclose which data items  
44  
45 belong to the intervention or to the control arms, ensuring blinding during data analyses.  
46  
47

48  
49 Quality will be assured through several mechanisms: piloting of data collection tools; thorough  
50  
51 training of field workers; checking missing data related; double, independent data entry from papers  
52  
53 into digital databases; early descriptive analyses to detect potential outliers; fieldworkers tracking  
54  
55 and supervision.  
56  
57  
58  
59  
60

## Data analysis

The analysis will be carried out for each country separately, and based on intention-to-treat.

Baseline population and health facility characteristics (i.e. basic demographic characteristics of population and health workers, professional profile of health workers, health facility size and services) will be summarised. If large imbalances are observed at baseline, the variables can be used to adjust the effect estimate comparisons [29,30].

The analyses vary for the different primary outcomes due to the unit of measurement and levels of clustering, the type of variable, and whether measurements were taken at baseline and endpoint or endpoint only. We use regression models to allow us to estimate the effect of the outcome while flexibly accounting for these issues and allowing adjustment for potential confounders.

Logistic regression will be used for the binary variables: vaccine adherence is measured by determining whether each vaccine due was received, and treatment appropriateness by whether each treatment was correctly prescribed. Data concordance and diagnostic scope are count variables and may be analysed with Poisson regression, depending on their distribution. The regression model for HW satisfaction will depend on how it is distributed.

The outcomes have different levels of clustering (children or consultations, HW, HF). We will account for these levels of clustering by including random effects in the regression models.

Four of the primary outcomes are measured at baseline and end-line. The effect of the intervention will be estimated using an interaction term between arm and survey in the regression models: i.e. is the change in the outcome between baseline and follow-up in the intervention arm different to the change between baseline and follow-up in the control arm? The effect of HW satisfaction, measured only at end-line, will be estimated as the difference between the intervention and control arm.

All estimates for the effect of the intervention will be presented with 95% confidence intervals. The analyses will be carried out using R [31].

### Measures to minimise bias

Statistical analyses will be carried out blindly, without knowledge of what health facilities or population in the catchment area belong to the intervention or control groups. Only when the analysis code is considered as definitive and fixed, will results be shared with the wider investigators team and the arms for health facilities and population will be disclosed.

Outcome measurement bias may take place where data from the HIS, which is the focus of the intervention, is used to measure outcomes. However, we will minimise this by assessing population based outcomes at household level.

Contamination (i.e. the intervention affects individuals or units assigned to the control arm) may happen via the exchanges between health workers from health facilities in both arms; for example: in monthly district data quality meetings, managerial meetings; or through inputs from supervisors who influence control health facilities with intervention tips encountered in health facilities of the intervention arms. One mechanism to address this issue is using a district-based cluster randomisation scheme. However, we consider that (i) contamination, despite increasing the awareness of health works in control health facilities, will hardly influence the decision making mechanisms that the HIS intervention focuses on; and (ii) randomisation at the level of district poses additional challenges that are not worth the marginal benefit of reducing a doubtful contamination [32].

The spill-over effect (i.e. benefits of the intervention extend beyond their direct recipients) [33] may take place in higher levels of the health systems; e.g. district data managers and programme managers may experience the benefits of better structured and more timely data produced in health facilities in the intervention arms. The trial will have no capacity to quantitatively account for spill overs at higher levels of the system, due to the limited number of higher level administrative areas that will be involved in the trial. However, through process indicators, we will consider potential benefits and harms of the intervention at higher levels of the system.

1  
2  
3 A challenge is the Hawthorne effect (i.e. observer effect). Both health workers in the intervention  
4 and in the control sites will have an awareness of being observed as data collection activities will be  
5 at the same level of intensity in the two arms. Therefore, there should be no differential effect.  
6  
7

8  
9  
10 Analyses will be based on the intention-to-treat. It is important to closely monitor if the intervention  
11 HFs consistently use the new HIS tools and approaches. The data collection team and the trial  
12 monitoring team will check if old forms are still being used in the intervention health facilities.  
13  
14

15  
16 However, we do not expect health facilities to migrate between intervention and control arms, or  
17 vice versa, due to feasibility issues. On the other hand, some household members in a given  
18 catchment area may decide to seek for health care in a health facility belonging to another trial arm.  
19  
20  
21

22 In these cases, households will be analysed as belonging to the original trial arm.  
23  
24  
25

## 26 **Ethics and dissemination**

27  
28  
29 Ethics committees in Côte d'Ivoire, Mozambique and Nigeria approved the study in their respective  
30 countries. To date, some modifications to the protocol have taken place. In Côte d'Ivoire, we decided  
31 to select study areas close to the research institution base on logistics and practical reasons, instead  
32 of selecting an area in the north of the country, where poorer health indicators have been described.  
33  
34  
35

36 In Mozambique, the low density of HF per population implied extremely vast distances between HF  
37 and this, coupled with the rainy season, made the trial unfeasible in the originally selected Nampula  
38 province. After consultations, we decided to move the trial to the province of Inhambane and cancel  
39 the household survey. The allocation of HF to the intervention and control arms was completed using  
40 random number generation.  
41  
42  
43  
44  
45  
46  
47  
48

49  
50 We plan to disseminate the findings of the trials as one of the few examples of studies assessing the  
51 effects of health information systems interventions using experimental study designs [34]. Most of  
52 the experimental studies on HIS are circumscribed to specific health care areas (e.g. tuberculosis,  
53 vaccination, cardiovascular disease) and very few have a system-wide approach (e.g. PHC) [34].  
54  
55  
56  
57

58  
59 Experimental studies for health systems interventions are sometimes dismissed because of their  
60



1  
2  
3 limited capacity to provide reliable explanations of complex health system issues [35]. While we  
4  
5 acknowledge these limitations, there is also a need for more robust evidence on the effects of these  
6  
7 types of health system interventions [36] and there are also good examples of experimental studies  
8  
9 reporting findings that can make it to the policy arena [37]. When embarking on this research, we  
10  
11 considered from the outset the type of evidence required to be disseminated and included into  
12  
13 systematic reviews [38], guidance development [39] and eventually recommendations for policy and  
14  
15 practice [40].  
16  
17  
18  
19  
20

21 We acknowledge the challenges of carrying out research on health care provided to remote, rural  
22  
23 communities (in this case in Sub-Saharan Africa). However, it is only in these remote areas where  
24  
25 research about their specific problems and needs can take place. Challenges included long distances,  
26  
27 poor conditions of roads, unreliable communications and limited food and accommodation services,  
28  
29 all of them to be proactively handled to keep the quality of work and the morale of researchers and  
30  
31 collaborators. We expect that the dissemination of findings in meetings, conferences and  
32  
33 publications will contribute to a better understanding of what it takes to make research in  
34  
35 challenging contexts.  
36  
37  
38

39 The engagement and ownership of partners within this research has also been instrumental in order  
40  
41 to plan and implement the CRCT. The intervention actually targets a governmental sub-system (the  
42  
43 HIS) for which we required more than permission but also endorsement and active support. We  
44  
45 achieved this level of collaboration by ensuring the participation of key stakeholders in key phases of  
46  
47 the whole project, from inception till the implementation of the last phases, through frequent  
48  
49 communication and workshops. The PHISICC programme includes targeted activities to keep  
50  
51 decision-makers engaged and we are planning to share the findings through workshops as well as  
52  
53 online and face-to-face events to disseminate the lessons learned from the trial and the whole  
54  
55 research.  
56  
57  
58  
59  
60

1  
2  
3 We also expect that the dissemination of our findings among partners and competitors will  
4  
5 contribute to the current debates on the digitalisation of health information systems. WHO  
6  
7 recommendations on the matter are weak since the underlying evidence to support these  
8  
9 recommendations is inconsistent [41]. The principles and methodological approaches in PHISICC can  
10  
11 be applied to the development of any technological solution, being on paper, digital or mixed.  
12  
13  
14 Finally, we expect that the results of the trials, both quantitative and qualitative, will be able to  
15  
16 inform policies on how to make HIS responsive to providers' decision-making needs, particularly in  
17  
18 health services where the most vulnerable live.  
19  
20  
21  
22  
23  
24  
25  
26  
27  
28  
29  
30  
31  
32  
33  
34  
35  
36  
37  
38  
39  
40  
41  
42  
43  
44  
45  
46  
47  
48  
49  
50  
51  
52  
53  
54  
55  
56  
57  
58  
59  
60

### Authors' contributions

XBC, AOI, AM, RBY and CAU prepared the proposal for the funding agency, conceived the study and produced the data collection tools. SG ensured the regulatory, ethical and trial monitoring components. AR developed the analytical approaches and made the sample size calculations. RBY, MS and SB adapted the protocol to the context of Côte d'Ivoire and managed the administrative and ethical approvals in the country; AOI, NE, ON, ANN and ABG likewise in Nigeria; AM, SML and GM, in Nampula province (Mozambique); JS and TM adapted the protocol and acquired ethical and administrative clearances for Inhambane province (Mozambique). DB is chair of the PHISICC Technical Advisory Group (TAG) and has coordinated multiple formal and informal inputs. LKK and DB have advised on the adequacy of the study protocol within the overall PHISICC proposal and TAG advices. All country teams participated in PHISICC workshops and ensured that the protocol was suitable to countries realities; developed data collection tools and training materials. They are responsible for the implementation of the trial in each country. XBC drafted the first version of the manuscript. All authors commented on several versions of the manuscript.

### Acknowledgements

Members of the PHISICC Technical Advisory Group, chaired by David Brown: Blanche Anya (WHO AFRO), Abdallah Bchir (former Gavi), Marta Gacic-Dobo (WHO HQ), Richard Greffé (AIGA), Pamela Mitula (WHO AFRO), Sandy Oliver (UCL Institute) and Chris Wolf (BMGF).

Research collaborators: Momade Ali, Celso Belo, Bassirou Bonfoh, Lisa Diallo, John Ferreira, Bernard Guessanbi, Caitlin Jarrett, Inza Koné, Felix Malé, Kouadio M'bra, David O'Donnell, Damaris Rodríguez (Sonder Collective), Melanie Wendland and Meike Zuske (Swiss TPH).

Stakeholders from Côte d'Ivoire, Mozambique and Nigeria, participating in the consultation processes.

## Data sharing statement

We report on a protocol of three Cluster Randomised Controlled Trials and therefore no data is available yet. On completion of the trials, access to data will be available from the national research institutions in Côte d'Ivoire, Mozambique and Nigeria, in publications and in the funding agency.

Individual participants' data on vaccination and antenatal care outcomes as well as health workers and users perceptions will be anonymised and made available via an online data repository for any purpose and access will be granted following a review of requests by the Swiss TPH contract officer. Data, with DOIs, will be made available during the second semester of 2021.

Available documents include study protocols, analytical plan, informed consent forms and analytical code.

## Ethical approvals in Côte d'Ivoire, Mozambique and Nigeria

- Comité National Ethique des Sciences de la Vie et de la Santé (CNESVS), reference: 024-19/MSHP/CNESVS-kp (Côte d'Ivoire)
- Comité Institucional de Bioética para Saúde da Universidade Lúrio, reference: 16.2/Julho/CBISUL/19 (Mozambique)
- Secretary, Government of Cross River State of Nigeria, Ministry of Health, Calabar Health Research Ethics Committee, reference: CRS/MH/HREC/018/Vol. V1/151 (Nigeria)
- Ethikkommission Nordwest- und Zentralschweiz (EKNZ), reference: 2018-01059 (Switzerland).

## Funding

Funded by the Bill & Melinda Gates Foundation, grant number INV-010193 / OPP1135947.

## Abbreviations

BMGF Bill & Melinda Gates Foundation

CRCT Cluster Randomised Controlled Trial

sd Standard deviation

HF Health Facility

HW Health worker

WHO World Health Organisation

## Additional files

- Additional file 1: CONSORT statement checklist.

## Competing interests

No, there are no competing interests for any author.

## References

- 1 WHO. Monitoring results with health facility information systems: A technical consultation Glion-sur-Montreux, Switzerland, 11–12 June 2014. WHO 2014.
- 2 WHO. Health facility & community data toolkit. WHO 2014.
- 3 Bosch-Capblanch X, Ronveaux O, Doyle V, Remedios V, Bchir A. Accuracy and quality of immunization information systems in forty-one low income countries. *Trop Med Int Health*. 2009 Jan;14(1):2-10. doi: 10.1111/j.1365-3156.2008.02181.x. PMID: 19152556.
- 4 Loder E. Promises, promises. *BMJ*. 2017 Mar 23;356:j1446. doi: 10.1136/bmj.j1446. PMID: 28336513.
- 5 Wenger N, Méan M, Castioni J, Marques-Vidal P, Waeber G, Garnier A. Allocation of Internal Medicine Resident Time in a Swiss Hospital: A Time and Motion Study of Day and Evening Shifts. *Ann Intern Med*. 2017 Apr 18;166(8):579-586. doi: 10.7326/M16-2238. Epub 2017 Jan 31. PMID: 28135724.
- 6 Bosch-Capblanch X, Zuske M, Auer C, Amadasoun S. Effects of interventions to improve ‘health information use systems’ on the quality and use of information. National Institute for Health Research. PROSPERO - [https://www.crd.york.ac.uk/prospero/display\\_record.php?RecordID=35218](https://www.crd.york.ac.uk/prospero/display_record.php?RecordID=35218).
- 7 Bosch-Capblanch X, Zuske M, Auer C. Making information support systems relevant to decision-makers: an effectiveness systematic review and a framework synthesis. Abstracts of the 25th Cochrane Colloquium, Edinburgh, UK. *Cochrane Database of Systematic Reviews* 2018;(9 Suppl 1). <https://doi.org/10.1002/14651858.CD201801>.
- 8 Schulz KF, Altman DG, Moher D, for the CONSORT Group. CONSORT 2010 Statement: updated guidelines for reporting parallel group randomised trials.
- 9 Campbell MK, Piaggio G, Elbourne DR, Altman DG; for the CONSORT Group. Consort 2010 statement: extension to cluster randomised trials. *BMJ*. 2012;345:e5661.
- 10 R Core Team. R: A Language and Environment for Statistical Computing [Internet]. Vienna, Austria; 2020. Available from: <https://www.R-project.org/>
- 11 Bostoen K, Chalabi Z. Optimization of household survey sampling without sample frames. *Int J Epidemiol*. 2006 Jun;35(3):751-5. doi: 10.1093/ije/dyl019. Epub 2006 Feb 15. PMID: 16481364.
- 12 Johnson, Sandhu, Tyler, “The Next Step for Human-Centered Design in Global Public Health” *Stanford Social Innovation Review*, Oct. 22, 2019.
- 13 WHO. Global Vaccine Action Plan 2011-2020. WHO 2013.

- 1  
2  
3  
4  
5  
6  
7  
8  
9  
10  
11  
12  
13  
14  
15  
16  
17  
18  
19  
20  
21  
22  
23  
24  
25  
26  
27  
28  
29  
30  
31  
32  
33  
34  
35  
36  
37  
38  
39  
40  
41  
42  
43  
44  
45  
46  
47  
48  
49  
50  
51  
52  
53  
54  
55  
56  
57  
58  
59  
60
- 14 Carroli G, Villar J, Piaggio G, Khan-Neelofur D, Gülmezoglu M, Mugford M, Lumbiganon P, Farnot U, Bergsjø P; WHO Antenatal Care Trial Research Group. WHO systematic review of randomised controlled trials of routine antenatal care. *Lancet*. 2001 May 19;357(9268):1565-70. doi: 10.1016/S0140-6736(00)04723-1. PMID: 11377643.
- 15 Alpern R, Canavan ME, Thompson JT, McNatt Z, Tatek D, Lindfield T, Bradley EH. Development of a brief instrument for assessing healthcare employee satisfaction in a low-income setting. *PLoS One*. 2013 Nov 5;8(11):e79053. doi: 10.1371/journal.pone.0079053. PMID: 24223878; PMCID: PMC3818514.
- 16 Doll WJ and Torkzadeh G. The measurement of end-user computing satisfaction. *MIS Quarterly* 1988;12(2):259–74; 19.
- 17 Ilias A, Yasoa MR, Razaka MZA and Rahmana RA. The study of end-user computing satisfaction (EUCS) on computerised accounting system (CAS) among Labuan F.T. Government sectors: a case study in the responsibility centres. *Labuan e-Journal of Muamalat and Society* 2007;1:1–13.
- 18 Arifeen SE, Hoque DM, Akter T, Rahman M, Hoque ME, Begum K, Chowdhury EK, Khan R, Blum LS, Ahmed S, Hossain MA, Siddik A, Begum N, Sadeq-ur Rahman Q, Haque TM, Billah SM, Islam M, Rumi RA, Law E, Al-Helal ZA, Baqui AH, Schellenberg J, Adam T, Moulton LH, Habicht JP, Scherpbier RW, Victora CG, Bryce J, Black RE. Effect of the Integrated Management of Childhood Illness strategy on childhood mortality and nutrition in a rural area in Bangladesh: a cluster randomised trial. *Lancet*. 2009 Aug 1;374(9687):393-403. doi: 10.1016/S0140-6736(09)60828-X. PubMed PMID: 19647607.
- 19 Tilahun H, Fekadu B, Abdisa H, Canavan M, Linnander E, Bradley EH, Berman P. Ethiopia's health extension workers use of work time on duty: time and motion study. *Health Policy Plan*. 2017 Apr 1;32(3):320-328. doi: 10.1093/heapol/czw129. PubMed PMID: 27658649.
- 20 Hayes RJ, Bennett S. Simple sample size calculation for cluster-randomized trials. *Int J Epidemiol*. 1999 Apr;28(2):319-26.
- 21 The DHS program. Demographic and Health surveys. <https://dhsprogram.com/>.
- 22 Thayaparan, A. a. (2013). The Patient Satisfaction Questionnaire Short Form (PSQ-18) as an adaptable, reliable, and validated tool for use in various settings. *Med Educ Online*, 18.
- 23 The Health Foundation. (2013, June). Measuring patient experience (no.18). Retrieved Nov 6, 2018, from [www.health.org.uk](http://www.health.org.uk): <https://www.health.org.uk/publication/measuring-patient-experience>.

- 1  
2  
3  
4  
5  
6  
7 24 Grogan, S. C. (2000). Validation of a questionnaire measuring patient satisfaction with general  
8 practitioner services. *Quality in Health Care*, 9, 210-215.
- 9  
10 25 LaVela, S. L. (2014). Evaluation and measurement of patient experience. *Patient Experience*  
11 *Journal*, 1(1), Article 5.
- 12  
13 26 Alpern, R. C. (2013, November). Development of a Brief Instrument for Assessing Healthcare  
14 Employee Satisfaction in a Low-Income Setting. *PLOS ONE*, 8(11), e79053.
- 15  
16 27 Chang, E. C. (2017). Measuring job satisfaction among healthcare staff in the United States: a  
17 confirmatory factor analysis of the Satisfaction of Employees in health Care (SEHC) survey.  
18 *International Journal for Quality in health Care*, 29(2), 262-268.
- 19  
20 28 Open Data Kit. <https://opendatakit.org/>. Accessed 5<sup>th</sup> February 2021.
- 21  
22 29 Pocock S, et al. Subgroup analysis, covariate adjustment and baseline comparisons in clinical trial  
23 reporting: current practice and problems. *Stat Med*. 2002;21:2917-30.
- 24  
25 30 The CONSORT Group. CONSORT Statement [Internet]; item 15.
- 26  
27 31 R Core Team. R: A language and environment for statistical computing. R Foundation for  
28 Statistical Computing, Vienna, Austria. URL <https://www.R-project.org/>.
- 29  
30 32 Torgerson David J. Contamination in trials: is cluster randomisation the answer? *BMJ* 2001;  
31 322:355.
- 32  
33 33 Benjamin-Chung J, Arnold BF, Berger D, Luby SP, Miguel E, Colford JM Jr, Hubbard AE. Spillover  
34 effects in epidemiology: parameters, study designs and methodological considerations. *Int J*  
35 *Epidemiol*. 2018 Feb 1;47(1):332-347. doi: 10.1093/ije/dyx201. PubMed PMID: 29106568; PubMed  
36 Central PMCID: PMC5837695.
- 37  
38 34 Leon N, Balakrishna Y, Hohlfeld A, Odendaal WA, Schmidt BM, Zweigenthal V, Anstey Watkins J,  
39 Daniels K. Routine Health Information System (RHIS) improvements for strengthened health system  
40 management. *Cochrane Database Syst Rev*. 2020 Aug 13;8:CD012012. doi:  
41 10.1002/14651858.CD012012.pub2. PMID: 32803893.
- 42  
43 35 Allanson ER, Tunçalp Ö, Vogel JP, Khan DN, Oladapo OT, Long Q, Gülmezoglu AM. Implementation  
44 of effective practices in health facilities: a systematic review of cluster randomised trials. *BMJ Glob*  
45 *Health*. 2017 Jul 20;2(2):e000266. doi: 10.1136/bmjgh-2016-000266. PMID: 29081997; PMCID:  
46 PMC5656132.
- 47  
48  
49  
50  
51  
52  
53  
54  
55  
56  
57  
58  
59  
60



1  
2  
3  
4  
5  
6  
7 36 Brown DW, Bosch-Capblanch X, Shimp L. Where Do We Go From Here? Defining an Agenda for  
8 Home-Based Records Research and Action Considering the 2018 WHO Guidelines. *Glob Health Sci*  
9 *Pract.* 2019 Mar 29;7(1):6-11. doi: 10.9745/GHSP-D-18-00431. PMID: 30877139; PMCID:  
10 PM6538131.

11  
12  
13  
14 37 Joos O, Silva R, Amouzou A, Moulton LH, Perin J, Bryce J, et al. Evaluation of a mhealth data  
15 quality intervention to improve documentation of pregnancy outcomes by health surveillance  
16 assistants in Malawi: a cluster randomized trial. *PloS One* 2016;11(1):e0145238. PMID: 26731401.  
17 DOI: <https://doi.org/10.1371/journal.pone.0145238>

18  
19  
20  
21 38 Langlois EV, Ranson MK, Bärnighausen T, Bosch-Capblanch X, Daniels K, El-Jardali F, Ghaffar A,  
22 Grimshaw J, Haines A, Lavis JN, Lewin S, Meng Q, Oliver S, Pantoja T, Straus S, Shemilt I, Tovey D,  
23 Tugwell P, Waddington H, Wilson M, Yuan B, Røttingen JA. Advancing the field of health systems  
24 research synthesis. *Syst Rev.* 2015 Jul 10;4:90. doi: 10.1186/s13643-015-0080-9. PMID: 26159806;  
25 PMCID: PMC4498528.

26  
27  
28  
29 39 Bosch-Capblanch X, Lavis JN, Lewin S, Atun R, Røttingen JA, Dröschel D, Beck L, Abalos E, El-Jardali  
30 F, Gilson L, Oliver S, Wyss K, Tugwell P, Kulier R, Pang T, Haines A. Guidance for evidence-informed  
31 policies about health systems: rationale for and challenges of guidance development. *PLoS Med.*  
32 2012;9(3):e1001185. doi: 10.1371/journal.pmed.1001185. Epub 2012 Mar 6. PMID: 22412356;  
33 PMCID: PMC3295823.

34  
35  
36  
37 40 WHO. WHO recommendations on home-based records for maternal, newborn and child health.  
38 WHO 2018.

39  
40  
41  
42 41 WHO. Recommendations on digital interventions for health system strengthening. WHO  
43 guideline. WHO 2019.  
44  
45  
46  
47  
48  
49  
50  
51  
52  
53  
54  
55  
56  
57  
58  
59  
60

## Tables and Figures

**Table 1. Outcomes and parameters used to estimate the sample sizes.**

|   | <b>Outcome name</b>           | <b>Subjects</b>                                                    | <b>Definition</b>                                                                                                                                                                               | <b>Baseline estimate</b>                | <b>Expected change</b>         | <b>Comments</b>                                                                 |
|---|-------------------------------|--------------------------------------------------------------------|-------------------------------------------------------------------------------------------------------------------------------------------------------------------------------------------------|-----------------------------------------|--------------------------------|---------------------------------------------------------------------------------|
| 1 | Vaccination adherence         | Children under-1 in (sample of households in catchment areas)      | Number of vaccines given in the previous calendar year over the number of vaccine due in the same period                                                                                        | 75 given per 100 due                    | Increase of 10 per 100         | Vaccines are clustered within children, and children within HFs                 |
| 2 | Data concordance              | Recording tools in health facilities (samples of records)          | Number of health care events (e.g. vaccinations, antenatal care consultations) recounted in the previous calendar year versus the number of health care events reported in the same time period | 7 recounted for each 10 reported [3]    | Increase of 1 recounted        | A single estimate can be obtained in each HF or by time periods (no clustering) |
| 3 | Diagnostic scope              | Records of sick child consultations (samples of records)           | Number of diagnosis in each sick child consultation during the previous calendar year                                                                                                           | 30% with more than 1 diagnosis          | 35% with more than 1 diagnosis | Individual consultations are clustered within HF                                |
| 4 | Treatment appropriateness     | Records of sick child consultations (samples of records)           | Number of treatments correctly prescribed in each sick child consultation during the previous calendar year                                                                                     | Half appropriate over all consultations | Increase to 60%                | Individual consultations are clustered within HF (one treatment per child)      |
| 5 | Health workforce satisfaction | Health workers (all health workers form include health facilities) | Degree (score) of satisfaction across all health facilities in each arm, with the intervention                                                                                                  | 50% satisfied                           | 75% satisfied                  | Maybe two or three health workers can be approached in each health facility     |

### Figure 1. PHISICC research programme structure, processes, deliverables and flow of evidence.

Footnote to Figure 1. WS: work stream. Timelines are approximate.

1  
2  
3  
4  
5  
6 **Figure 2. CONSORT diagram: trial flow chart.**  
7

8  
9 Separate file.  
10  
11  
12  
13  
14  
15  
16  
17  
18  
19  
20  
21  
22  
23  
24  
25  
26  
27  
28  
29  
30  
31  
32  
33  
34  
35  
36  
37  
38  
39  
40  
41  
42  
43  
44  
45  
46  
47  
48  
49  
50  
51  
52  
53  
54  
55  
56  
57  
58  
59  
60

For peer review only

1  
2  
3  
4  
5  
6  
7  
8  
9  
10  
11  
12  
13  
14  
15  
16  
17  
18  
19  
20  
21  
22  
23  
24  
25  
26  
27  
28  
29  
30  
31  
32  
33  
34  
35  
36  
37  
38  
39  
40  
41  
42  
43  
44  
45  
46  
47  
48  
49  
50  
51  
52  
53  
54  
55  
56  
57  
58  
59  
60

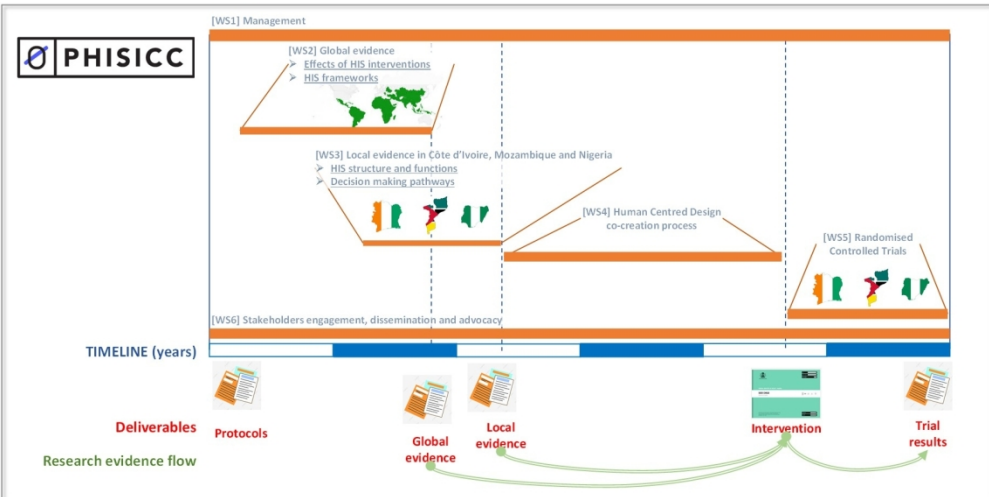

Figure 1. PHISICC research programme structure, processes, deliverables and flow of evidence.

312x157mm (150 x 150 DPI)

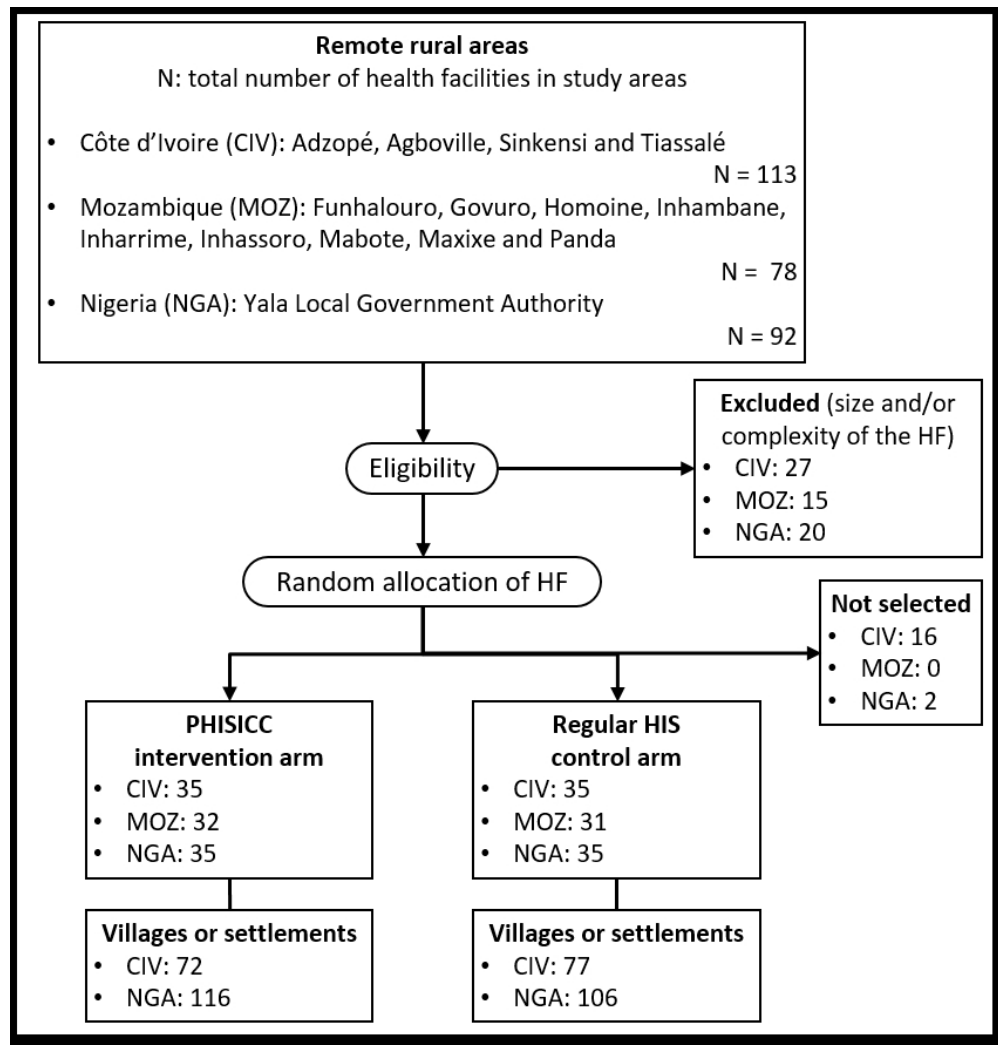

Figure 12. CONSORT diagram: trial flow chart.

144x150mm (150 x 150 DPI)

```
1
2
3 #
4 # clustersampleSize_proportions_baseline&endline.r
5 # get power of cluster randomised trial for binary outcomes (baseline and
6 # endline surveys)
7 # 2 groups (control & intervention)
8 # clustered within HF
9
10
11 rm(list=ls())
12
13 # if the package lme4 is not already installed (needed for regression with
14 # random effects)
15 # install.packages(lme4)
16 require(lme4)
17 #install.packages("reshape")
18 library(reshape)
19
20
21
22 # INPUTS
23 numGroups<-2
24 numHFPerGroup<-35
25 numTrialsToSimulate<-100
26 # numTrialsToSimulate: use 10 to test that the script runs, use 100 or 1000 for
27 # precise estimate of power
28
29
30
31
32 # choose input set and remove #s to run
33
34 # inputs for 'treatments with appropriate diagnosis'
35 pInterv<-0.60
36 pControl<-0.50
37 sdHFcluster<-0.55
38 # for k=0.1, 0.20; for k=0.25, 0.55
39 numObsPerHF<-25
40
41 # inputs for vaccination adherence
42 # proportions in interventions and control groups
43 # pInterv<-0.8
44 # pControl<-0.75
45 # sdHFcluster<-2.63
46 # numObsPerHF<-30
47
48
49
50 # inputs for 'more than one diagnosis'
51 # pInterv<-0.35
52 # pControl<-0.30
53 # sdHFcluster<-0.39
54 # for k=0.1, 0.16; for k=0.25, 0.39
55 # numObsPerHF<-60
56
57
58
59 # NB getsd is a function at the bottom of the script to turn k into sdHFcluster
60 (sdHFcluster is on the logit scale)
```

```

1
2
3
4
5
6 # --- simulation ----
7
8 # SET UP DATA STRUCTURE (intervention, HF)
9 totNumHF <- numHFPerGroup*numGroups
10 HFList<-seq(1:totNumHF)
11 interv<- rep(c(0,1),each=(totNumHF/2) )
12 intervEffect<-rep( c(0,(log(pInterv/(1-pInterv)) -
13 log(pControl/(1-pControl))) ), each=(totNumHF/2) )
14
15
16 xtemp<-cbind(interv,HFList,intervEffect)
17
18 # SET UP STORE FOR PVALUES AND PRECISION
19 storeResults<-array(-9,dim=c(numTrialsToSimulate,3))
20 colnames(storeResults)<-c("pvalue","coeff","stderr")
21
22
23 # LOOP THROUGH THE SIMULATIONS
24
25 for (i in 1:numTrialsToSimulate) {
26
27 # simulate the HF cluster effects
28 HFEffect<-rnorm(totNumHF,mean=0,sd=sdHFcluster)
29 xtemp2a<-cbind(xtemp, HFEffect)
30 xtemp2a<-data.frame(xtemp2a)
31
32
33 # get expected proportions (pre and post)
34 xtemp2a$expectedprelogodds<-log(pControl/(1-pControl)) + xtemp2a$HFEffect
35
36 xtemp2a$expectedpostlogodds<-log(pControl/(1-pControl)) +
37 xtemp2a$intervEffect + xtemp2a$HFEffect
38
39 xtemp2a$expectedpre<-exp(xtemp2a$expectedprelogodds)/(1+exp(xtemp2a$expectedpre
40 logodds))
41
42 xtemp2a$expectedpost<-exp(xtemp2a$expectedpostlogodds)/(1+exp(xtemp2a$expectedp
43 ostlogodds))
44
45 # expand by the number of observations per HF
46 xtemp2b<-untable(xtemp2a, num=numObsPerHF)
47 numObs<-dim(xtemp2b)[1]
48
49
50 # simulate individual observations from cluster mean rates
51 simObsPost<-rep(0,numObs)
52 simObsPre<-rep(0,numObs)
53 for (j in 1:numObs) {
54 simObsPost[j]<-rbinom(n=1, size=1,prob=xtemp2b$expectedpost[j])
55 simObsPre[j]<-rbinom(n=1, size=1,prob=xtemp2b$expectedpre[j])
56 }
57 # drop variables not needed further
58 xtemp2b$expectedpostlogodds<-NULL; xtemp2b$expectedprelogodds<-NULL
59
60

```

```
1
2
3
4     # stack pre and post observations
5     # get post
6     xtemp3<-cbind(xtemp2b,simObsPost)
7     xtemp3<-data.frame(xtemp3)
8     xtemp3$simObs<-xtemp3$simObsPost
9     xtemp3$simObsPost<-NULL
10    xtemp3$post<-1
11    # get pre
12    xtemp4<-cbind(xtemp2b,simObsPre)
13    xtemp4<-data.frame(xtemp4)
14    xtemp4$simObs<-xtemp4$simObsPre
15    xtemp4$simObsPre<-NULL
16    xtemp4$post<-0
17    xtemp4$interv<-0
18    xtemp5<-rbind(xtemp3,xtemp4)
19
20
21
22    # carry out analysis for individual trial
23    m <- glmer(simObs ~ as.factor(interv) + post + (1 | HFList),
24 data<-xtemp5, family=binomial)
25
26    # store result of individual trial in storeResults (p-value, coefficient
27 and std error)
28    out1<-summary(m)$coefficients
29    storeResults[i,2]<-out1[2,1]
30    storeResults[i,3]<-out1[2,2]
31    storeResults[i,1]<-out1[2,4]
32
33
34    print(i)
35
36 } # End of loop
37
38 # calculate power
39 pvalue<-storeResults[,1]
40 power<-length(pvalue[pvalue<0.05])/length(pvalue)
41
42 cat("power ", power, "\n")
43
44
45
46
47 # ----- run to here -----
48
49
50
51
52
53
54
55 # -----
56 # getsd: function to estimate between-cluster variation from k (Hayes and
57 Bennet sd/mean) and input base proportion (base0p)
58
59
60
```



```
1
2
3 getsd<-function(base0p,k){
4     sdcluster<-k*base0p
5     clusterEffect<-rnorm(1000,mean=0,sd=sdcluster)
6     expectedp<-base0p + clusterEffect
7     expectedp[expectedp>1]<-0.9999
8     expectedp[expectedp<0]<-0.0001
9     logitexpectedp<-log((expectedp)/(1-expectedp))
10    sdlog<-sd(logitexpectedp)
11    cat("estimated sdlog ", sdlog, "\n")
12
13 }
14
15 # example
16 getsd(0.30,0.25)
17
18 getsd(0.50, 0.25)
```

```

1
2
3 #
4 # clusterSampleSize_concordance.r
5 # get power of cluster randomised trial
6 # ratios (outcome is continuous)
7 # fixed to 2 groups
8 # records and reports clustered within HF
9 #
10
11
12 # if the package lme4 is not already installed (needed for regression with
13 random effects)
14 # install.packages(lme4)
15 # install.packages(lmerTest)
16 require(lme4)
17 require(lmerTest)
18
19
20
21 # EXAMPLE INPUTS
22 numGroups<-2
23 numHFPerGroup<-35
24 numReportedPerHF<-100
25 # assuming equal numbers of vaccinations per HF
26 numTrialsToSimulate<-100
27 # 100 or 1000 needed for precision of the power estimate, use 10 for test runs
28
29 ratioControl<-0.7
30 ratioInterv<-0.8
31 sdHFcluster<-0.25*0.8
32 # sdHFcluster is on the log scale, calculated using k=0.25
33
34
35
36
37 # --- run simulation from here ----
38
39 # SET UP DATA STRUCTURE (intervention, HF)
40 totNumHF<-numGroups*numHFPerGroup
41 HFList<-rep(seq(1:(numHFPerGroup*numGroups)),each=1)
42 interv<-c( rep(c(0,1),each=(totNumHF/2)))
43 intervEffect<-rep( c(0,(ratioInterv - ratioControl )), each=(totNumHF/2) )
44 xtemp<-cbind(interv,HFList,intervEffect)
45
46
47 # SET UP STORE FOR PVALUES AND PRECISION
48 storeResults<-array(-9,dim=c(numTrialsToSimulate,3))
49 colnames(storeResults)<-c("pvalue","coeff","stderr")
50
51
52 # LOOP THROUGH THE SIMULATIONS
53
54 for (i in 1:numTrialsToSimulate) {
55
56   # simulate the HF cluster effects
57
58   HFEffect<-rnorm(numHFPerGroup*numGroups,mean=0,sd=sdHFcluster)
59   xtemp2<-cbind(xtemp, HFEffect)
60

```

```

1
2
3
4     # get expected ratios (pre and post)
5     expectedpreratio<-ratioControl + HFEeffect
6     expectedpostratio<-ratioControl + intervEffect + HFEeffect
7     expectedpreratio[expectedpreratio<0.0001]<-0.0001
8     expectedpostratio[expectedpostratio<0.0001]<-0.0001
9
10    # simulate individual observations as poisson rate of number reported per
11    1 recorded
12    simObsPost<-rep(0,length(expectedpostratio))
13    simObsPre<-rep(0,length(expectedpreratio))
14    for (j in 1:length(expectedpostratio)) {
15        simObsPost[j]<-rpois(n=1,expectedpostratio[j]*numReportedPerHF)
16        simObsPre[j]<-rpois(n=1,expectedpreratio[j]*numReportedPerHF)
17    }
18
19
20
21    # stack pre and post observations
22    # post
23    xtemp3<-cbind(xtemp2,simObsPost)
24    xtemp3<-data.frame(xtemp3)
25    xtemp3$simObs<-xtemp3$simObsPost
26    xtemp3$simObsPost<-NULL
27    xtemp3$post<-1
28    # pre
29    xtemp4<-cbind(xtemp2,simObsPre)
30    xtemp4<-data.frame(xtemp4)
31    xtemp4$simObs<-xtemp4$simObsPre
32    xtemp4$simObsPre<-NULL
33    xtemp4$post<-0
34    xtemp4$interv<-0
35    # stack pre and post
36    xtemp5<-rbind(xtemp3,xtemp4)
37    xtemp5$distanceToOne<-abs(1-(xtemp5$simObs/numReportedPerHF))
38
39
40
41    # carry out analysis for individual trial
42    m <- lmer(distanceToOne ~ as.factor(interv) + post + (1|HFList),
43    data=xtemp5)
44
45    # store result of individual trial in storeResults (p-value, coefficient
46    and std error)
47    out1<-summary(m)$coefficients
48    # estimate
49    storeResults[i,2]<-out1[2,1]
50    # se
51    storeResults[i,3]<-out1[2,2]
52    # p-value
53    storeResults[i,1]<-out1[2,5]
54
55
56    print(i)
57
58    } # End of loop
59
60

```

```
1
2
3
4     # calculate power
5     pvalue<-storeResults[,1]
6     power<-length(pvalue[pvalue<0.05])/length(pvalue)
7
8     cat("power ", power, "\n")
9
10
11     # -----
12
13
14
15
16
17
18
19
20
21
22
23
24
25
26
27
28
29
30
31
32
33
34
35
36
37
38
39
40
41
42
43
44
45
46
47
48
49
50
51
52
53
54
55
56
57
58
59
60
```

**Table 1: CONSORT 2010 checklist of information to include when reporting a cluster randomised trial**

| Section/Topic                    | Item No | Standard Checklist item                                                                                                               | Extension for cluster designs                                                                                                                                                                                           | Page No *          |
|----------------------------------|---------|---------------------------------------------------------------------------------------------------------------------------------------|-------------------------------------------------------------------------------------------------------------------------------------------------------------------------------------------------------------------------|--------------------|
| <b>Title and abstract</b>        |         |                                                                                                                                       |                                                                                                                                                                                                                         |                    |
|                                  | 1a      | Identification as a randomised trial in the title                                                                                     | Identification as a cluster randomised trial in the title                                                                                                                                                               | 1                  |
|                                  | 1b      | Structured summary of trial design, methods, results, and conclusions                                                                 | See table 2                                                                                                                                                                                                             | 5                  |
| <b>Introduction</b>              |         |                                                                                                                                       |                                                                                                                                                                                                                         |                    |
| <b>Background and objectives</b> | 2a      | Scientific background and explanation of rationale                                                                                    | Rationale for using a cluster design                                                                                                                                                                                    | 4                  |
|                                  | 2b      | Specific objectives or hypotheses                                                                                                     | Whether objectives pertain to the cluster level, the individual participant level or both                                                                                                                               | 5                  |
| <b>Methods</b>                   |         |                                                                                                                                       |                                                                                                                                                                                                                         |                    |
| <b>Trial design</b>              | 3a      | Description of trial design (such as parallel, factorial) including allocation ratio                                                  | Definition of cluster and description of how the design features apply to the clusters                                                                                                                                  | 6                  |
|                                  | 3b      | Important changes to methods after trial commencement (such as eligibility criteria), with reasons                                    |                                                                                                                                                                                                                         | Not applicable     |
| <b>Participants</b>              | 4a      | Eligibility criteria for participants                                                                                                 | Eligibility criteria for clusters                                                                                                                                                                                       | 6                  |
|                                  | 4b      | Settings and locations where the data were collected                                                                                  |                                                                                                                                                                                                                         | 6                  |
| <b>Interventions</b>             | 5       | The interventions for each group with sufficient details to allow replication, including how and when they were actually administered | Whether interventions pertain to the cluster level, the individual participant level or both                                                                                                                            | 8                  |
| <b>Outcomes</b>                  | 6a      | Completely defined pre-specified primary and secondary outcome measures, including how and when they were assessed                    | Whether outcome measures pertain to the cluster level, the individual participant level or both                                                                                                                         | 10 and Table 1     |
|                                  | 6b      | Any changes to trial outcomes after the trial commenced, with reasons                                                                 |                                                                                                                                                                                                                         | Not applicable     |
| <b>Sample size</b>               | 7a      | How sample size was determined                                                                                                        | Method of calculation, number of clusters(s) (and whether equal or unequal cluster sizes are assumed), cluster size, a coefficient of intracluster correlation (ICC or <i>k</i> ), and an indication of its uncertainty | 12                 |
|                                  | 7b      | When applicable, explanation of any interim analyses and stopping guidelines                                                          |                                                                                                                                                                                                                         | Not yet applicable |

| Section/Topic                           | Item No | Standard Checklist item                                                                                                                                                                     | Extension for cluster designs                                                                                                                                                              | Page No *      |
|-----------------------------------------|---------|---------------------------------------------------------------------------------------------------------------------------------------------------------------------------------------------|--------------------------------------------------------------------------------------------------------------------------------------------------------------------------------------------|----------------|
| <b>Randomisation:</b>                   |         |                                                                                                                                                                                             |                                                                                                                                                                                            |                |
| <b>Sequence generation</b>              | 8a      | Method used to generate the random allocation sequence                                                                                                                                      |                                                                                                                                                                                            | 7, 8           |
|                                         | 8b      | Type of randomisation; details of any restriction (such as blocking and block size)                                                                                                         | Details of stratification or matching if used                                                                                                                                              | Not applicable |
| <b>Allocation concealment mechanism</b> | 9       | Mechanism used to implement the random allocation sequence (such as sequentially numbered containers), describing any steps taken to conceal the sequence until interventions were assigned | Specification that allocation was based on clusters rather than individuals and whether allocation concealment (if any) was at the cluster level, the individual participant level or both | 7              |
| <b>Implementation</b>                   | 10      | Who generated the random allocation sequence, who enrolled participants, and who assigned participants to interventions                                                                     | Replace by 10a, 10b and 10c                                                                                                                                                                | 7              |
|                                         | 10a     |                                                                                                                                                                                             | Who generated the random allocation sequence, who enrolled clusters, and who assigned clusters to interventions                                                                            | 7              |
|                                         | 10b     |                                                                                                                                                                                             | Mechanism by which individual participants were included in clusters for the purposes of the trial (such as complete enumeration, random sampling)                                         | 10             |
|                                         | 10c     |                                                                                                                                                                                             | From whom consent was sought (representatives of the cluster, or individual cluster members, or both), and whether consent was sought before or after randomisation                        | 8              |
|                                         |         |                                                                                                                                                                                             |                                                                                                                                                                                            |                |
| <b>Blinding</b>                         | 11a     | If done, who was blinded after assignment to interventions (for example, participants, care providers, those assessing outcomes) and how                                                    |                                                                                                                                                                                            | 8              |
|                                         | 11b     | If relevant, description of the similarity of interventions                                                                                                                                 |                                                                                                                                                                                            | Not applicable |
| <b>Statistical methods</b>              | 12a     | Statistical methods used to compare groups for primary and secondary outcomes                                                                                                               | How clustering was taken into account                                                                                                                                                      | 15             |
|                                         | 12b     | Methods for additional analyses, such as subgroup analyses and adjusted analyses                                                                                                            |                                                                                                                                                                                            | 15             |

| Section/Topic            | Item No | Standard Checklist item                                                                                          | Extension for cluster designs                                             | Page No *                                |
|--------------------------|---------|------------------------------------------------------------------------------------------------------------------|---------------------------------------------------------------------------|------------------------------------------|
| <b>Results</b>           |         |                                                                                                                  |                                                                           | Not yet applicable (protocol manuscript) |
| <b>Discussion</b>        |         |                                                                                                                  |                                                                           |                                          |
| <b>Limitations</b>       | 20      | Trial limitations, addressing sources of potential bias, imprecision, and, if relevant, multiplicity of analyses |                                                                           | 18                                       |
| <b>Generalisability</b>  | 21      | Generalisability (external validity, applicability) of the trial findings                                        | Generalisability to clusters and/or individual participants (as relevant) | 18,19                                    |
| <b>Interpretation</b>    | 22      | Interpretation consistent with results, balancing benefits and harms, and considering other relevant evidence    |                                                                           | Not yet applicable                       |
| <b>Other information</b> |         |                                                                                                                  |                                                                           |                                          |
| <b>Registration</b>      | 23      | Registration number and name of trial registry                                                                   |                                                                           | 1                                        |
| <b>Protocol</b>          | 24      | Where the full trial protocol can be accessed, if available                                                      |                                                                           | 1                                        |
| <b>Funding</b>           | 25      | Sources of funding and other support (such as supply of drugs), role of funders                                  |                                                                           | 20                                       |

\* Page numbers: as seen in the document "draft\_Proof\_hi.pdf" (which has 34 pages)

## CONSORT 2010 checklist of information to include when reporting a cluster randomised trial

| Section/Topic                    | Item No | Standard Checklist item                                                                                                               | Extension for cluster designs                                                                                                                                                                                      | Page No *          |
|----------------------------------|---------|---------------------------------------------------------------------------------------------------------------------------------------|--------------------------------------------------------------------------------------------------------------------------------------------------------------------------------------------------------------------|--------------------|
| <b>Title and abstract</b>        |         |                                                                                                                                       |                                                                                                                                                                                                                    |                    |
|                                  | 1a      | Identification as a randomised trial in the title                                                                                     | Identification as a cluster randomised trial in the title                                                                                                                                                          | 1                  |
|                                  | 1b      | Structured summary of trial design, methods, results, and conclusions                                                                 | See table 2                                                                                                                                                                                                        | 5                  |
| <b>Introduction</b>              |         |                                                                                                                                       |                                                                                                                                                                                                                    |                    |
| <b>Background and objectives</b> | 2a      | Scientific background and explanation of rationale                                                                                    | Rationale for using a cluster design                                                                                                                                                                               | 4                  |
|                                  | 2b      | Specific objectives or hypotheses                                                                                                     | Whether objectives pertain to the cluster level, the individual participant level or both                                                                                                                          | 5                  |
| <b>Methods</b>                   |         |                                                                                                                                       |                                                                                                                                                                                                                    |                    |
| <b>Trial design</b>              | 3a      | Description of trial design (such as parallel, factorial) including allocation ratio                                                  | Definition of cluster and description of how the design features apply to the clusters                                                                                                                             | 6                  |
|                                  | 3b      | Important changes to methods after trial commencement (such as eligibility criteria), with reasons                                    |                                                                                                                                                                                                                    | Not applicable     |
| <b>Participants</b>              | 4a      | Eligibility criteria for participants                                                                                                 | Eligibility criteria for clusters                                                                                                                                                                                  | 6                  |
|                                  | 4b      | Settings and locations where the data were collected                                                                                  |                                                                                                                                                                                                                    | 6                  |
| <b>Interventions</b>             | 5       | The interventions for each group with sufficient details to allow replication, including how and when they were actually administered | Whether interventions pertain to the cluster level, the individual participant level or both                                                                                                                       | 8                  |
| <b>Outcomes</b>                  | 6a      | Completely defined pre-specified primary and secondary outcome measures, including how and when they were assessed                    | Whether outcome measures pertain to the cluster level, the individual participant level or both                                                                                                                    | 10 and Table 1     |
|                                  | 6b      | Any changes to trial outcomes after the trial commenced, with reasons                                                                 |                                                                                                                                                                                                                    | Not applicable     |
| <b>Sample size</b>               | 7a      | How sample size was determined                                                                                                        | Method of calculation, number of clusters(s) (and whether equal or unequal cluster sizes are assumed), cluster size, a coefficient of intracluster correlation (ICC or $k$ ), and an indication of its uncertainty | 12                 |
|                                  | 7b      | When applicable, explanation of any interim analyses and stopping guidelines                                                          |                                                                                                                                                                                                                    | Not yet applicable |



| Section/Topic                           | Item No | Standard Checklist item                                                                                                                                                                     | Extension for cluster designs                                                                                                                                                              | Page No *      |
|-----------------------------------------|---------|---------------------------------------------------------------------------------------------------------------------------------------------------------------------------------------------|--------------------------------------------------------------------------------------------------------------------------------------------------------------------------------------------|----------------|
| <b>Randomisation:</b>                   |         |                                                                                                                                                                                             |                                                                                                                                                                                            |                |
| <b>Sequence generation</b>              | 8a      | Method used to generate the random allocation sequence                                                                                                                                      |                                                                                                                                                                                            | 7, 8           |
|                                         | 8b      | Type of randomisation; details of any restriction (such as blocking and block size)                                                                                                         | Details of stratification or matching if used                                                                                                                                              | Not applicable |
| <b>Allocation concealment mechanism</b> | 9       | Mechanism used to implement the random allocation sequence (such as sequentially numbered containers), describing any steps taken to conceal the sequence until interventions were assigned | Specification that allocation was based on clusters rather than individuals and whether allocation concealment (if any) was at the cluster level, the individual participant level or both | 7              |
| <b>Implementation</b>                   | 10      | Who generated the random allocation sequence, who enrolled participants, and who assigned participants to interventions                                                                     | Replace by 10a, 10b and 10c                                                                                                                                                                | 7              |
|                                         | 10a     |                                                                                                                                                                                             | Who generated the random allocation sequence, who enrolled clusters, and who assigned clusters to interventions                                                                            | 7              |
|                                         | 10b     |                                                                                                                                                                                             | Mechanism by which individual participants were included in clusters for the purposes of the trial (such as complete enumeration, random sampling)                                         | 10             |
|                                         | 10c     |                                                                                                                                                                                             | From whom consent was sought (representatives of the cluster, or individual cluster members, or both), and whether consent was sought before or after randomisation                        | 8              |
| <b>Blinding</b>                         | 11a     | If done, who was blinded after assignment to interventions (for example, participants, care providers, those assessing outcomes) and how                                                    |                                                                                                                                                                                            | 8              |
|                                         | 11b     | If relevant, description of the similarity of interventions                                                                                                                                 |                                                                                                                                                                                            | Not applicable |
| <b>Statistical methods</b>              | 12a     | Statistical methods used to compare groups for primary and secondary outcomes                                                                                                               | How clustering was taken into account                                                                                                                                                      | 15             |
|                                         | 12b     | Methods for additional analyses, such as subgroup analyses and adjusted analyses                                                                                                            |                                                                                                                                                                                            | 15             |

| Section/Topic            | Item No | Standard Checklist item                                                                                          | Extension for cluster designs                                             | Page No *                                |
|--------------------------|---------|------------------------------------------------------------------------------------------------------------------|---------------------------------------------------------------------------|------------------------------------------|
| <b>Results</b>           |         |                                                                                                                  |                                                                           | Not yet applicable (protocol manuscript) |
| <b>Discussion</b>        |         |                                                                                                                  |                                                                           |                                          |
| <b>Limitations</b>       | 20      | Trial limitations, addressing sources of potential bias, imprecision, and, if relevant, multiplicity of analyses |                                                                           | 18                                       |
| <b>Generalisability</b>  | 21      | Generalisability (external validity, applicability) of the trial findings                                        | Generalisability to clusters and/or individual participants (as relevant) | 18,19                                    |
| <b>Interpretation</b>    | 22      | Interpretation consistent with results, balancing benefits and harms, and considering other relevant evidence    |                                                                           | Not yet applicable                       |
| <b>Other information</b> |         |                                                                                                                  |                                                                           |                                          |
| <b>Registration</b>      | 23      | Registration number and name of trial registry                                                                   |                                                                           | 1                                        |
| <b>Protocol</b>          | 24      | Where the full trial protocol can be accessed, if available                                                      |                                                                           | 1                                        |
| <b>Funding</b>           | 25      | Sources of funding and other support (such as supply of drugs), role of funders                                  |                                                                           | 20                                       |

# BMJ Open

## Does an innovative paper-based health information system (PHISICC) improve data quality and use in primary health care? Protocol of a multi-country, cluster randomised controlled trial in Sub-Saharan African rural settings.

|                                 |                                                                                                                                                                                                                                                                                                                                                                                                                                                                                                                                                                                                                                                                                                                                                                                                                                                                                                                                                                                                                                                                                                                                                                                                                                                                                                                                                                          |
|---------------------------------|--------------------------------------------------------------------------------------------------------------------------------------------------------------------------------------------------------------------------------------------------------------------------------------------------------------------------------------------------------------------------------------------------------------------------------------------------------------------------------------------------------------------------------------------------------------------------------------------------------------------------------------------------------------------------------------------------------------------------------------------------------------------------------------------------------------------------------------------------------------------------------------------------------------------------------------------------------------------------------------------------------------------------------------------------------------------------------------------------------------------------------------------------------------------------------------------------------------------------------------------------------------------------------------------------------------------------------------------------------------------------|
| Journal:                        | <i>BMJ Open</i>                                                                                                                                                                                                                                                                                                                                                                                                                                                                                                                                                                                                                                                                                                                                                                                                                                                                                                                                                                                                                                                                                                                                                                                                                                                                                                                                                          |
| Manuscript ID                   | bmjopen-2021-051823.R2                                                                                                                                                                                                                                                                                                                                                                                                                                                                                                                                                                                                                                                                                                                                                                                                                                                                                                                                                                                                                                                                                                                                                                                                                                                                                                                                                   |
| Article Type:                   | Protocol                                                                                                                                                                                                                                                                                                                                                                                                                                                                                                                                                                                                                                                                                                                                                                                                                                                                                                                                                                                                                                                                                                                                                                                                                                                                                                                                                                 |
| Date Submitted by the Author:   | 02-Jul-2021                                                                                                                                                                                                                                                                                                                                                                                                                                                                                                                                                                                                                                                                                                                                                                                                                                                                                                                                                                                                                                                                                                                                                                                                                                                                                                                                                              |
| Complete List of Authors:       | Bosch-Capblanch, Xavier; Swiss Tropical and Public Health Institute; University of Basel<br>Oyo-Ita, Angela; University of Calabar, Department of Community Medicine<br>Muloliwa, Artur; Lurio University Faculty of Health Sciences<br>Yapi, Richard; Centre Suisse de Recherches Scientifiques en Côte d'Ivoire<br>Auer, Christian ; Swiss Tropical and Public Health Institute; University of Basel<br>Samba, Mamadou; Ministère de la Santé et de l'Hygiène Publique<br>Gajewski, Suzanne; Swiss Tropical and Public Health Institute; University of Basel<br>Ross, Amanda; Swiss Tropical and Public Health Institute; University of Basel<br>Krause, L Kendall; Bill & Melinda Gates Foundation<br>Ekpenyong, Nnette; University of Calabar Teaching Hospital, Department of Community Medicine<br>Nwankwo, Ogonna; University of Calabar, Department of Community Medicine<br>Njepuome, Anthonia; Swiss Tropical and Public Health Institute<br>Lee, Sofia; Swiss Tropical and Public Health Institute<br>Sacarlal, Jahit ; Eduardo Mondlane University, Faculty of Medicine<br>Madede, Tavares; Universidade Eduardo Mondlane<br>Berté, Salimata; Centre Suisse de Recherches Scientifiques en Côte d'Ivoire<br>Matsinhe, Graça; Ministério da Saúde<br>Garba, Abdullahi; National Primary Healthcare Development Agency<br>Brown, David; BCGI LLC / pivot-23.5° |
| <b>Primary Subject Heading</b>: | Health services research                                                                                                                                                                                                                                                                                                                                                                                                                                                                                                                                                                                                                                                                                                                                                                                                                                                                                                                                                                                                                                                                                                                                                                                                                                                                                                                                                 |
| Secondary Subject Heading:      | Global health, Health policy, Research methods                                                                                                                                                                                                                                                                                                                                                                                                                                                                                                                                                                                                                                                                                                                                                                                                                                                                                                                                                                                                                                                                                                                                                                                                                                                                                                                           |
| Keywords:                       | Human resource management < HEALTH SERVICES ADMINISTRATION & MANAGEMENT, Organisation of health services < HEALTH SERVICES ADMINISTRATION & MANAGEMENT, Protocols & guidelines < HEALTH SERVICES ADMINISTRATION & MANAGEMENT, Quality in health care <                                                                                                                                                                                                                                                                                                                                                                                                                                                                                                                                                                                                                                                                                                                                                                                                                                                                                                                                                                                                                                                                                                                   |

1  
2  
3  
4  
5  
6  
7  
8  
9  
10  
11  
12  
13  
14  
15  
16  
17  
18  
19  
20  
21  
22  
23  
24  
25  
26  
27  
28  
29  
30  
31  
32  
33  
34  
35  
36  
37  
38  
39  
40  
41  
42  
43  
44  
45  
46  
47  
48  
49  
50  
51  
52  
53  
54  
55  
56  
57  
58  
59  
60

|  |                                                                                          |
|--|------------------------------------------------------------------------------------------|
|  | HEALTH SERVICES ADMINISTRATION & MANAGEMENT, STATISTICS & RESEARCH METHODS, PRIMARY CARE |
|  |                                                                                          |

SCHOLARONE™  
Manuscripts



I, the Submitting Author has the right to grant and does grant on behalf of all authors of the Work (as defined in the below author licence), an exclusive licence and/or a non-exclusive licence for contributions from authors who are: i) UK Crown employees; ii) where BMJ has agreed a CC-BY licence shall apply, and/or iii) in accordance with the terms applicable for US Federal Government officers or employees acting as part of their official duties; on a worldwide, perpetual, irrevocable, royalty-free basis to BMJ Publishing Group Ltd ("BMJ") its licensees and where the relevant Journal is co-owned by BMJ to the co-owners of the Journal, to publish the Work in this journal and any other BMJ products and to exploit all rights, as set out in our [licence](#).

The Submitting Author accepts and understands that any supply made under these terms is made by BMJ to the Submitting Author unless you are acting as an employee on behalf of your employer or a postgraduate student of an affiliated institution which is paying any applicable article publishing charge ("APC") for Open Access articles. Where the Submitting Author wishes to make the Work available on an Open Access basis (and intends to pay the relevant APC), the terms of reuse of such Open Access shall be governed by a Creative Commons licence – details of these licences and which [Creative Commons](#) licence will apply to this Work are set out in our licence referred to above.

Other than as permitted in any relevant BMJ Author's Self Archiving Policies, I confirm this Work has not been accepted for publication elsewhere, is not being considered for publication elsewhere and does not duplicate material already published. I confirm all authors consent to publication of this Work and authorise the granting of this licence.

## Title

Does an innovative paper-based health information system (PHISICC) improve data quality and use in primary health care? Protocol of a multi-country, cluster randomised controlled trial in Sub-Saharan African rural settings.

## Authors

- Xavier Bosch-Capblanch. Corresponding author. Swiss Tropical and Public Health Institute. Basel, Switzerland. And University of Basel, Basel, Switzerland. x.bosch@unibas.ch
- Angela Oyo-Ita. Department of Community Medicine, University of Calabar, Calabar, Nigeria. oyo\_ita@yahoo.com
- Artur Manuel Muloliwa. Faculty of Health Sciences, Lúrio University, Nampula, Mozambique. muloliwa@yahoo.com.br
- Richard B Yapi. Centre Suisse de Recherches Scientifiques en Côte d'Ivoire, Abidjan, Côte d'Ivoire. And Centre d'Entomologie Médicale et Vétérinaire, Université Alassane Ouattara, Bouaké, Côte d'Ivoire. richard.yapi@csrs.ci
- Christian Auer. Swiss Tropical and Public Health Institute. Basel, Switzerland. And University of Basel, Basel, Switzerland. christian.auer@swisstph.ch
- Mamadou Samba. Ministère de la Santé et de l'Hygiène Publique, Abidjan, Côte d'Ivoire. And Université Félix Houphouët Boigny, Abidjan, Côte d'Ivoire. samba.mamadou@gmail.com
- Suzanne Gajewski. Swiss Tropical and Public Health Institute. Basel, Switzerland. And University of Basel, Basel, Switzerland. suzanne.gajewski@swisstph.ch
- Amanda Ross. Swiss Tropical and Public Health Institute. Basel, Switzerland. And University of Basel, Basel, Switzerland. amanda.ross@swisstph.ch
- L Kendall Krause. Bill & Melinda Gates Foundation, Seattle, USA. Kendall.Krause@gatesfoundation.org
- Nnette Ekpenyong. Department of Community Medicine, University of Calabar Teaching Hospital, Calabar, Nigeria. And Department of Community Medicine University of Calabar, Calabar, Nigeria. nnekon2015@gmail.com
- Ogonna Nwankwo. Swiss Tropical and Public Health Institute, Basel, Switzerland. And University of Basel, Basel, Switzerland. And Health Policy, Management and Economics Firm, Department of Community. Medicine, University of Calabar, Calabar, Nigeria. ogonna.nwankwo@swisstph.ch
- Anthonia Ngozi Njebuome. Swiss Tropical and Public Health Institute, Abuja, Nigeria. ngonjep@yahoo.com
- Sofia Mandjate Lee. Swiss Tropical and Public Health Institute; Manhiça, Mozambique. sofia\_mandjate@yahoo.com.br
- Jahit Sacarlal. Faculty of Medicine, Eduardo Mondlane University, Maputo, Mozambique. jahityash2002@gmail.com
- Tavares Madede. Department of Community Health, Faculty of Medicine, Eduardo Mondlane University, Maputo, Mozambique. tmadede@gmail.com
- Salimata Berté. Centre Suisse de Recherches Scientifiques en Côte d'Ivoire, Abidjan, Côte d'Ivoire. sali.berte@csrs.ci
- Graça Matsinhe. Expanded Program on Immunization, Ministry of Health, Maputo, Mozambique. gmatsinhe@gmail.com.
- Abdullahi Bulama Garba. Director Planning, Research and Statistics, National Primary Health Care Development Agency, Abuja, Nigeria. ab.garba@nphcda.gov.ng.
- David W Brown. Managing Principal, BCGI LLC / pivot-23.5°, North Carolina, USA. david.brown@pivot235.org

## Abstract

### Introduction

Frontline health workers in remote health facilities are the first contact of the formal health sector and are confronted with life-saving decisions. Health information systems (HIS) support the collection and use of data. However, HIS focus on reporting and are unfit to support decisions. Since data tools are paper-based in most primary health care settings, we have produced an innovative paper-based HIS (PHISICC) using a Human Centred Design approach. We are carrying out a cluster-randomised controlled trial in three African countries to assess the effects of PHISICC compared with the current systems.

### Methods and analysis

Study areas are in rural zones of Côte d'Ivoire, Mozambique and Nigeria. Seventy health facilities in each country have been randomly allocated to using PHISICC tools or to continuing to use the regular HIS tools. We have randomly selected households in the catchment areas of each health facility to collect outcomes' data. The baseline survey has been carried out in two of the three countries, the end-line survey is planned for mid-2021. Primary outcomes include data quality and use and coverage of health services and health workers satisfaction; secondary outcomes are additional data quality and use parameters, childhood mortality and additional health workers and clients experience with the system. Just prior to the implementation of the trial we had to relocate the studies in Mozambique and Côte d'Ivoire due to unforeseen logistical issues. The effects of the intervention will be estimated using regression models and accounting for clustering using random effects.

### Ethics and dissemination

Ethics committees in Côte d'Ivoire, Mozambique and Nigeria approved the trials. We plan to disseminate our findings, data and research materials among researchers and policy makers. We aim at having our findings included in systematic reviews on health systems interventions and future guidance development on the matter.

### Registration

Pan African Clinical Trials Registry - PACTR201904664660639. Registered 01/04/2019,  
<https://pactr.samrc.ac.za/Search.aspx>.

## Article summary

### Strengths and limitations of the study

- These trials assess the effects of improving paper-based health information systems, which are greatly used particularly in remote, rural areas but which are neglected in research.
- The paper-based interventions have been developed using a Human Centred Design approach, with frontline health workers and designers driving the co-creation process.
- Despite the complexity of health systems interventions, we have applied robust experimental methods, together with qualitative research, to assess and understand the effects of the paper-based intervention. Robust evidence on health systems is more likely to gain the credibility of policy-makers and to make it into systematic reviews, guidance development and policy and practice.
- Research targeting frontline health workers in remote, rural areas has to take place where they live and work, which poses serious obstacles in the organisation, management and monitoring of the trials.
- These obstacles, aggravated by the COVID-19 pandemic, have challenged the mobility of the research team, the availability of the intervention in one of the countries and the duration of the trials.



## Introduction

Frontline health workers (HW) in remote, rural health facilities (HF) in many countries are the first contact with the formal health sector of the population and they are confronted with life-saving clinical and public health decisions on a daily basis. Decisions are made by exerting a balanced judgment on the information related to health care events, such as making the correct diagnoses or deciding on which vaccinations a child should receive on a given day. In order to properly handle this information, appropriate data support tools and processes are required, referred to as the health information system (HIS); or Routine HIS or Health Management Information System [1]. In reality, though, HIS are primarily designed to report aggregated health events to the higher tiers of the health systems rather than to inform decision-making at the point of care [2].

Increasing pressure by donors and governments to collect more and more data has aggravated the situation, through the proliferation of data support tools that have overloaded frontline health workers compromising their capacity to deliver good quality of care and to delivery good quality data [3], for higher level decision-making.

Promising 'quick fixes', such as the scale up of digital HIS, are taking a long time to implement and face enormous challenges related to infrastructure, equipment and services necessary to run them. Besides, research evidence on the effects of digital solutions remains patchy and inconsistent, even in high-income country settings, where complaints about computerisation of clinical care have been raised [4,5]. Hence, it is very likely that paper tools will remain a primary, if not unique, data support mechanism particularly in remote, rural HF in many countries.

PHISICC (Paper-based Health Information System in Comprehensive Care) is a multi-year, multi-country, mixed-methods research project that aims at producing and testing an innovative paper-based HIS to improve data quality and use, decision making and health outcomes, at Primary Health Care (PHC). It is being carried out in selected areas within Côte d'Ivoire, Mozambique and Nigeria. The project started in 2015, producing a systematic review on the effects of HIS interventions [6,7]

1  
2  
3 and a framework synthesis on how HIS are understood in the literature in order to learn from past  
4 experiences in HIS developments. This global evidence was coupled with studies to characterise the  
5 existing HIS in the three countries, to understand how health workers interact with the HIS and to  
6 identify entry points for HIS design improvements. With these bodies the research team was well  
7 equipped to engage into a Human Centred Design (HCD) co-creative process with frontline HW to  
8 design an innovative HIS (PHISICC). See Figure 1 for an illustration of the structure, processes and  
9 evidence flow within PHISICC.

10  
11  
12  
13  
14  
15  
16  
17  
18  
19 The impact of the PHISICC HIS on data quality and use, quality of health care and HW perceptions is  
20 being assessed concurrently in rural areas in the three countries. We describe the design of the trial  
21 here, consistent with CONSORT reporting guidelines [8] and the extension for cluster randomised  
22 controlled trials (CRCT) [9]; see Additional file 1.

## 23 24 25 26 27 28 29 **Methods**

### 30 31 32 **Aim**

33  
34  
35 The aim of the trial is to address the research question: what are the effects of an innovative paper-  
36 based HIS (PHISICC) on data use and quality, quality of health and HW perceptions compared with  
37 the current HIS, in rural PHC settings?  
38  
39  
40  
41  
42

### 43 44 **Patient and public involvement**

45  
46  
47  
48  
49  
50  
51  
52  
53  
54  
55  
56  
57  
58  
59  
60  
There was no public or patient involvement in the design of the study or selection of study areas  
because the intervention being assessed in these trials target health care providers and decision-  
makers, rather than patients or the public in general. Population in the catchment area of selected  
health facilities, potentially using their services, were only approached in order to assess the studies  
outcomes.

On the other hand, we have involved health systems stakeholders and frontline health workers.

Ministries of Health at several levels participated in the preparation of the research proposal

1  
2  
3 (personal consultations), in the characterisation of health information systems that preceded the  
4 trials (countries workshops), and throughout all project components (additional workshops,  
5 newsletters and personal communication). Frontline health workers in the three countries have co-  
6 created the intervention (i.e. paper based tools) through workshops, personal feedback and piloting  
7 under real live conditions. Some of them are part of the research team and co-authoring this  
8 manuscript.  
9  
10  
11  
12  
13  
14  
15  
16

### 17 **Study design**

18  
19 The study is a CRCT in each of the three countries. In each setting, 70 health facilities are randomised  
20 to intervention or control (35 per arm). The intervention arm HF use the new PHISICC tools  
21 (substituting the usual HIS tools) and the control arm HF use the regular HIS tools. The trial is  
22 implemented in the real life contexts of HF carrying out their usual duties.  
23  
24  
25  
26  
27  
28

29 The trials started between the end of 2019 and beginning of 2020, depending on the country, when  
30 the intervention was installed and the baseline surveys carried out. Data collection will last until mid-  
31 2021.  
32  
33  
34  
35  
36

### 37 **Study areas**

38  
39 Ministries of Health (MOH) officials in several countries were contacted before submitting the  
40 proposal to the funding agency in order to explore the willingness to engage in a project focusing on  
41 paper-based tools. Officials in several countries rejected the offer on the grounds of upcoming  
42 digitalisation plans of the HIS in the country. We partnered with MOH that found the research  
43 relevant to their context in three countries.  
44  
45  
46  
47  
48  
49

50 In each country, the eligibility criteria of study areas were that they had to belong to the operational  
51 area of research partners; contain a large enough number of health facilities and their catchment  
52 population; include vulnerable population (e.g. with low vaccination coverage, high childhood  
53 mortality); and be comparatively neglected in terms of infrastructure and services. We excluded  
54 areas with concurrent research or other types of activities that could conflict with the CRCT (such as  
55  
56  
57  
58  
59  
60

1  
2  
3 the co-existence of another health-related study, massive developments in infrastructure or activities  
4 involving migration of the population, such as temporary work sites or changes in working sites) and  
5 areas with threats to safety or security that could jeopardise research activities.  
6  
7  
8

9  
10 The study areas are located in Adzopé, Agboville, Tiassalé and Sikensi districts (Côte d'Ivoire); in  
11 Funhalouro, Govuro, Homoine, Inhambane, Inharrime, Inhassoro, Mabote, Maxixe and Panda  
12 (Inhambane province, Mozambique); and in Yala Local Government Authority (Cross River State,  
13  
14  
15  
16  
17  
18  
19  
20  
21  
22  
23  
24  
25  
26  
27  
28  
29  
30  
31  
32  
33  
34  
35  
36  
37  
38  
39  
40  
41  
42  
43  
44  
45  
46  
47  
48  
49  
50  
51  
52  
53  
54  
55  
56  
57  
58  
59  
60

### Eligibility of health facilities

The intervention is implemented at the HF level. The eligibility criteria of the HF were that they had to be located in the study areas, belong to the governmental health sector and their main activity should be the delivery of PHC services. HF were excluded if they had specialised clinical services, inpatients, physicians providing care or with plans for staff turn-over involving intervention and control HF.

A 'master list' of eligible health facilities was prepared based on information provided by the MOH across all study areas. We aimed at selecting 70 of the eligible HF in each country, using simple random techniques in R [10]. See in Figure 2 the selection and allocation trial flow chart.

### Allocation and blinding

Allocation of the 70 HF per country into the intervention and control arms took place in a formal event, gathering research partners and MOH officials to offer transparency and promote study ownership by local and national authorities. Equally sized, folded pieces of paper with the names and codes of included HF written on them were introduced in an opaque receptacle where they were manually and blindly mixed. A second receptacle contained two equally sized pieces of paper, one with the word 'intervention' and another one with the word 'control'. A selected person in the meeting, not belonging to the research team, extracted one piece of paper at a time to reach half the number of included HF. Then, a paper was extracted from the second receptacle to assign those HF

1  
2  
3 to the intervention or control arms. The rest of the papers were extracted as well to verify  
4  
5 completeness and no duplication of names, and those HF assigned to the other arm.  
6

7  
8 Once HF were selected, all villages or settlements for each health facility catchment area were listed  
9  
10 and three in each catchment area were selected. In practice, we selected all villages because the  
11  
12 numbers were below (in Côte d'Ivoire) or just above (in Nigeria) the needs. For each village, we used  
13  
14 Google satellite maps to identify and geo-locate every visible roof. Where there were many houses  
15  
16 per village (roughly, more than fifty or so), a researcher would mark four points in the map slightly  
17  
18 beyond the northernmost, southernmost, easternmost and westernmost roofs seen and 30 random  
19  
20 points were selected within that square. From the mapped points, 10 per village (with 10 more acting  
21  
22 as reserve) were randomly selected and marked on another map used in the field for data collectors  
23  
24 to approach households. Where technical problems impeded this approach in a given village, a field  
25  
26 supervisor would rotate a bottle on the floor towards the centre of the village and would select at  
27  
28 random 10 households in the direction pointed by the bottle, from the outer limit of the village till  
29  
30 the centre [11].  
31  
32  
33

34  
35 Blinding is only feasible for the research team members carrying out the CRCT data collection and the  
36  
37 analyses of the CRCT findings. The intervention (i.e. paper tools) are by design very different from the  
38  
39 existing system and it is not possible to blind participants or principal researchers.  
40

41  
42 We already had the agreement of the MOH and selected HF compliant with the inclusion criteria  
43  
44 were provided with the intervention shortly after completing the baseline data collection. Therefore,  
45  
46 recruitment as such took place at the same time of the allocation of HF into intervention and control  
47  
48 arms.  
49

## 50 51 **The intervention**

52  
53 The PHISICC paper-based intervention is a full set of paper-based tools to support decision-making by  
54  
55 frontline HW. These are the only tools to be used by HW in the intervention arm. The PHISICC tools  
56  
57 encompass the whole system (i.e. recording and reporting) and all clinical and public health care  
58  
59  
60

1  
2  
3 areas and are characterised by a common visual language (e.g. spaces for digits and text), and  
4  
5 standardised formats across health care areas. To support frontline health workers decision-making,  
6  
7 the PHISICC tools incorporate specific places to explicitly record critical data items (e.g. respiratory  
8  
9 rate in infants), graphic artefacts to distinguish severity degrees of signs or symptoms (i.e. small  
10  
11 square for 'normality', diamond for 'attention' and bold diamond for 'critical severity'); space to  
12  
13 document diagnoses and treatment decisions; and aides memoires in the first page of register  
14  
15 books..  
16  
17

18  
19 The PHISICC tools have been developed from May 2017 till June 2019, including production, using a  
20  
21 Human Centred Design approach [12]. A strength of the Human Centred Design approach is its ability  
22  
23 to unlock the user's perspective so that designers can build solutions that are fully reality-based and  
24  
25 work well. Co-creation groups were formed in each country with researchers, staff from partner  
26  
27 institutions and healthcare workers, led by a team of professional designers. Research team  
28  
29 members supervised and coordinated exclusively the feedback on the contents of the tools, to  
30  
31 ensure compliance with each country clinical guidelines. At the outset of the process, the design  
32  
33 focused on three health care areas (i.e. antenatal care, vaccination and sick child) and slowly  
34  
35 extended the new visual language to other health care areas. Initial workshops served to brainstorm  
36  
37 on problems and potential design solutions, without any other rule than being comprehensive and  
38  
39 not rejecting a single idea. Designers, then, formalised some of the most promising solutions and a  
40  
41 first round of exchanges within the co-creation team was used to address misinterpretations or  
42  
43 inconsistencies. There were two in-the-field testing rounds in Mozambique, two in Côte d'Ivoire and  
44  
45 three in Nigeria and uncountable exchanges through teleconferences and email, in-between. The  
46  
47 prototypes were considered final when no errors were detected, were compliant with data needs in  
48  
49 each country and comments from the field could not be accommodated in the design concept or  
50  
51 there was no consensus on minor or formal issues being raised.  
52  
53  
54  
55

56  
57 The PHISICC tools have been produced in French for Côte d'Ivoire, in Portuguese for Mozambique  
58  
59 and in English for Nigeria, which are the official languages used in the health systems in the three  
60

1  
2  
3 countries. They include the official logo of the MOHs. Health care areas covered include: family  
4  
5 planning, antenatal care, including tetanus toxoid vaccination, delivery, post-natal care, vaccination,  
6  
7 sick child, adults outpatient consultation, tuberculosis diagnosis and treatment, and HIV. Referral  
8  
9 forms were also designed.

10  
11  
12 The PHISICC tools have three sub-components: registers, tallies and reports. Registers are formed by  
13  
14 seven DIN-A3 and one DIN-A4 (for referrals) book covering all health care areas except for  
15  
16 tuberculosis treatment, for which DIN-A3 cards were used. Register books have 100, 200 or 400  
17  
18 pages depending on the country and health care area. They are used to record individual clients' data  
19  
20 for each health care event, either of clinical or public health nature. Some register books have clinical  
21  
22 notes at the very beginning, as 'aide memoires', and an example of a filled-in form, to assist HW  
23  
24 when doubting how to proceed.  
25  
26

27  
28 Tallies are DIN-A3 single sheets which contain a list of the indicators to be transferred to higher levels  
29  
30 of the health system, with a series of small ovals, grouped in fives, to mark with tally sticks with a  
31  
32 pen. In contrast to the current systems that have no tallies or only for vaccination, tallies were  
33  
34 created for all health care areas. In the middle-right side of the tally, a column accommodates cells  
35  
36 aligned with the ovals to insert the count for each indicator; and in the far right of the sheet there is  
37  
38 a replica of the count column, separated with a perforated line, which is detached and sent, as part  
39  
40 of the monthly report to the higher level in the health system.  
41  
42

43  
44 While current HIS tools are consistently organised in tabular formats and books, where each clinical  
45  
46 event is recorded in a row and each variable (e.g. age, gender, HIV status, diagnosis) in a column,  
47  
48 PHISICC tools incorporated several innovations; in summary: a visual language to guide the clinical  
49  
50 decisions of health workers based on severity (i.e. if it is recorded that a child has convulsions, a  
51  
52 visual artefact indicates severity), more space for clinical data (e.g. vital signs), inclusion of all critical  
53  
54 information to assess patients (e.g. obstetric history, gestational age, fundus height, breath rate in  
55  
56 infants), consolidation of information of all antenatal care visits for a single pregnant woman in the  
57  
58  
59  
60

1  
2  
3 same page, among many other formal and contents improvements, including improved aesthetics. A  
4  
5 systematic comparison of the new (intervention) and current (control) tools is provided in Table 1.  
6

7  
8 We aimed at creating “a system” (not just some tools) focusing on decision making by frontline  
9  
10 health workers. The epidemiological and public health contexts in the three countries are similar, as  
11  
12 confirmed by the similarities in the existing HIS between the three. The visual language and the  
13  
14 recording forms were common to the three countries because clinical decisions are common to the  
15  
16 three; although forms allowed for specific tests or treatments. The reporting component was  
17  
18 adapted to each country set of indicators, although the visual language and reporting processes were  
19  
20 harmonised.  
21  
22

23  
24 During three or four days, HW were trained on HIS before the start of the trial. In the intervention  
25  
26 arm they were trained on the PHISICC tools; and the control arm received a refresher training about  
27  
28 the regular tools, during the same number of days.  
29

30  
31 Additionally, given that the regular tools already contained information on past vaccination history of  
32  
33 children still to complete their vaccination schedule, we created a mechanism to retrieve data of  
34  
35 children’s vaccination status to transcribe into the new vaccination register book in the intervention  
36  
37 arm (‘system transition’).  
38

39  
40 Tools were endorsed by MOH, printed in local printing companies and distributed to HW at the end  
41  
42 of the training sessions. A digital spreadsheet was created to monitor consumption and order  
43  
44 additional tools to cover health facility needs during the life of the trial.  
45  
46

## 47 **Outcomes**

48  
49  
50  
51 **There are five primary outcomes (**  
52  
53  
54  
55  
56  
57  
58  
59  
60



1  
2  
3 Table 2). Vaccination adherence is defined as the total number of vaccine doses given in the correct  
4  
5 time interval to children in households in the health facilities catchment villages of those over the  
6  
7 total number of vaccine doses that should have been given during the same period. Antenatal care  
8  
9 visits uptake will also be considered depending on the expected number of pregnancies in the study  
10  
11 areas. Both are used as proxies for health outcomes in terms of protection against disease [13] and  
12  
13 prevention of pregnancy complications [14] and are assessed in a random sample of households in  
14  
15 the health facilities catchment areas. Data concordance is defined as the level of agreement of HIS  
16  
17 indicators between (i) records of health care events (re-counts), (ii) tallies (re-counts) and (iii) reports  
18  
19 (aggregated data to higher levels of the system) [3]. Decision-making will be assessed considering the  
20  
21 diagnostics scope in the sick child (i.e. number of different diagnoses per sick child consultation) and  
22  
23 treatment appropriateness (i.e. number of prescribed treatments that are supported by a  
24  
25 documented diagnosis). These outcomes will be assessed in a random sample of records and  
26  
27 corresponding reports during the last four months of the study period. Health workers satisfaction  
28  
29 will be assessed in all health workers in included health facilities using a standardised questionnaire  
30  
31 [15,16,17]. While the intervention targets HF, some of the outcomes are measured at the level of  
32  
33 HF, and some from patients clustered within HF catchment areas.

34  
35  
36  
37  
38  
39 Secondary outcomes are classified under the following domains: data quality, data use, mortality,  
40  
41 HW experience, client experience and resource consumption:

- 42  
43 • Data quality, assessed in a sample of records
  - 44  
45 ○ Completeness of recording and reporting in specific forms; i.e. prevalence of unduly  
46  
47 missing data items; partograph used;
  - 48  
49 ○ accuracy of recorded figures in comparison to real events (e.g. physical counting of  
50  
51 commodities, such as number of 500mg Paracetamol tablets as recorded versus  
52  
53 number of 500mg Paracetamol tablets as counted);
  - 54  
55 ○ timeliness of reporting, as documented by time stamps in forms;
  - 56  
57 ○ loss of data or data which does not reach the next upper administrative level.
  - 58  
59  
60

- 1
- 2
- 3
- 4
- 5
- 6
- 7
- 8
- 9
- 10
- 11
- 12
- 13
- 14
- 15
- 16
- 17
- 18
- 19
- 20
- 21
- 22
- 23
- 24
- 25
- 26
- 27
- 28
- 29
- 30
- 31
- 32
- 33
- 34
- 35
- 36
- 37
- 38
- 39
- 40
- 41
- 42
- 43
- 44
- 45
- 46
- 47
- 48
- 49
- 50
- 51
- 52
- 53
- 54
- 55
- 56
- 57
- 58
- 59
- 60
- Data use, assessed in a sample of records
  - in terms of knowledge (e.g. vaccines due based on date of birth; weight for length assessments);
  - cases of different conditions properly treated in (e.g. diarrhoea cases given oral rehydration therapy according to national guidelines; pneumonia cases given appropriate antibiotic according to national guidelines;
  - public health decisions: availability of lost to follow up lists or plans for vaccination, tuberculosis and or HIV/AIDS treatment control;
  - occurrence of stock outs of essential drugs.
- Overall under-5s mortality and under-5s mortality excluding peri-natal mortality [18], in a sample of households in health facilities catchment areas.
- Health workers' 'human experience' and satisfaction (all health workers).
- District health information officers' 'human experience' (selected health care programme managers).
- Clients' 'human experience' and satisfaction, in a sample of households in health facilities catchment areas.
- Resources consumption (e.g. time use, costs)
  - intervention costs: tools, training, start-up;
  - time used for recording and reporting (e.g. time-motion study) [19];
  - cost-effectiveness per unit of additional improvement in outcomes of interest.

It is worthwhile to note that outcomes that do not relate to data quality and use will be assessed using additional data collection tools (e.g. survey questionnaires), which are the same for intervention and control health facilities. Hence, the effects of the intervention cannot be attributed to the changes in performance of the paper tools routinely used to record health care events in intervention and control health facilities, which are different by design.

1  
2  
3 In addition, we will consider ‘explanatory outcomes’ that will help to understand how the measured  
4 effects have taken place and why. We will look at the details of the interplay between the  
5 intervention, the system, the users and the context. Process indicators will be based on the  
6 documented activities that have taken place, from the conception of the intervention, up to its  
7 implementation, monitoring and evaluation. Process indicators may include: intervention set up and  
8 implementation, monitoring of the use of the intervention, special activities targeted at vulnerable  
9 populations, district reactions related to the intervention, handling of data coming from the new  
10 system, sustainability based on costs information and perceptions, alignment with national health  
11 policies and donor priorities. We will also explore health care services characteristics looking at  
12 generic indicators from health facilities, such human resources profiles and relations with the  
13 communities, population characteristics and system and context characteristics captured in early  
14 stages of the project, where data are available.

### 31 **Sample size calculations**

32  
33 The required sample sizes for each primary outcome were determined using simulation to  
34 incorporate the clustering easily (Table 1) and to take the baseline and end-line surveys into account.  
35 Briefly, we simulated 1000 trials with variation between them caused by drawing different samples  
36 from the same distributions. We then used the regression models detailed in the data section to  
37 analyse each of the simulated trials and estimate the power as the proportion of trials which  
38 detected the effect of the intervention as significant. The simulation code was written in R  
39 (supplementary files 1 and 2).

40  
41 For each country, we require the probability of  $\alpha$ , a type I error (rejecting the null hypothesis when it  
42 is actually true) to be less 0.05 and the power to be at least 80%.

43  
44 For vaccination adherence, using a sample size of 35 HF per arm, we would have 80% power in each  
45 country to detect as significant a difference between a proportion of due vaccines given from 75% in  
46 the control to 85% in the intervention arm, assuming one child per household, 30 households per HF  
47  
48  
49  
50  
51  
52  
53  
54  
55  
56  
57  
58  
59  
60

1  
2  
3 and a between-HF variation equivalent to a  $k$  of 0.25, where  $k$  is equal to the standard deviation  
4  
5 divided by the mean. The value of  $k$  is unknown, but was chosen in line with general observations by  
6  
7 Hayes and Bennet [20].  
8

9  
10 For data quality outcomes, with 35 HF per arm we would be able to detect as significant a difference  
11  
12 from a ratio of 0.7 (reported : recorded) vaccinations in the control arm to 0.8 with the intervention  
13  
14 with 80% power, assuming 100 recorded vaccinations per HF and a standard deviation of 0.25 in the  
15  
16 ratios between HF.  
17

18  
19 In terms of diagnostic scope, we would be able to detect an increase in the proportion of child-visits  
20  
21 with more than one diagnosis from 30% to 35% with 80% power with 35 HF per arm, 60 records per  
22  
23 HF and assuming a  $k$  of 0.25.  
24

25  
26 We would be able to detect as significant an increase from 50% of treatments having a  
27  
28 corresponding appropriate diagnosis to 60% with 80% power assuming 35 HF per arm, 1 treatment  
29  
30 per child, 25 children per HF and variation between HF corresponding to  $k = 0.25$ .  
31

32  
33 For the outcome related to health workers' satisfaction, we would be able to detect as significant an  
34  
35 increase from 50% of health workers satisfied to 75%, with 80% power assuming 35 HF, three health  
36  
37 workers per HF and a variation between HF equivalent to  $k = 0.25$ . Since this variable is measured in  
38  
39 the end-line survey only, we used the formula in Hayes and Bennet [20].  
40

41  
42 In summary, in each country we require 35 HF per arm, three HW per HF, 100 vaccination records  
43  
44 per HF, 60 sick child records per health facility and 30 children per health facility catchment area.  
45  
46  
47

#### 48 **Data collection and management**

49  
50 Data collection took place at baseline and will take place again at the end of the study. Data is  
51  
52 collected from health facilities, from the households in the catchment areas of the included health  
53  
54 facilities and also from district offices.  
55

56  
57 For data quality and data use outcomes, HF registers, tallies and reports will be scrutinised. For  
58  
59 population based outcomes, we carry out household surveys at baseline and at end-line. We use  
60

1  
2  
3 standard approaches for these types of surveys [21]. Households are visited, the research project is  
4  
5 briefly introduced and consent requested. Ideally, mothers of alive children or women in child-  
6  
7 bearing age were interviewed in order to obtain information on living children (i.e. vaccination  
8  
9 history) and death events, respectively, using home-based records if available and accessible.  
10  
11 Patients' satisfaction will be assessed using the PSQ-18 satisfaction questionnaire [22,23,24].  
12  
13  
14 Essentially, the tool enables practitioners to investigate the extent to which their health care service  
15  
16 meets the perceived needs of their client group and pinpoint areas for improvement [24]. The  
17  
18 interview will be conducted with consenting patients as close to their care encounter as possible  
19  
20 [25]. Data tools are translated into the official languages of the study countries and pilot tested for  
21  
22 consistent meaning and relevance to the setting. Data collectors are also able to communicate in  
23  
24 local languages. The Satisfaction of Employees in Health Care (SEHC) survey is a validated tool to  
25  
26 assess staff satisfaction. It was first developed and validated in a low-income country (Ethiopia) [26]  
27  
28 and later successfully validated in a high-income country (USA) [27].  
29  
30

31  
32 We use a mix of paper and electronic data (ODK [28]) collection tools. Data collectors are trained to  
33  
34 minimise error. Tools are piloted before implementing. ODK data is regularly stored and sent to  
35  
36 secure servers, as soon as data collectors reach their office base. Data from paper tools is double  
37  
38 entered and compared and sent to secure servers. Each data collection tool has its corresponding  
39  
40 electronic database that is cleaned and submitted to the analyses. All data is anonymised at the point  
41  
42 of data collection or as soon as possible in the data management process. Data is labelled with an  
43  
44 arm code (e.g. 'A' or 'B') without any further information allowing to disclose which data items  
45  
46 belong to the intervention or to the control arms, ensuring blinding during data analyses.  
47  
48

49  
50 Quality will be assured through several mechanisms: piloting of data collection tools; thorough  
51  
52 training of field workers; checking missing data related; double, independent data entry from papers  
53  
54 into digital databases; early descriptive analyses to detect potential outliers; fieldworkers tracking  
55  
56 and supervision.  
57  
58  
59  
60

## Data analysis

The analysis will be carried out for each country separately, and based on intention-to-treat.

Baseline population and health facility characteristics (i.e. basic demographic characteristics of population and health workers, professional profile of health workers, health facility size and services) will be summarised. If large imbalances are observed at baseline, the variables can be used to adjust the effect estimate comparisons [29,30].

The analyses vary for the different primary outcomes due to the unit of measurement and levels of clustering, the type of variable, and whether measurements were taken at baseline and endpoint or endpoint only. We use regression models to allow us to estimate the effect of the outcome while flexibly accounting for these issues and allowing adjustment for potential confounders.

Logistic regression will be used for the binary variables: vaccine adherence is measured by determining whether each vaccine due was received, and treatment appropriateness by whether each treatment was correctly prescribed. Data concordance and diagnostic scope are count variables and may be analysed with Poisson regression, depending on their distribution. The regression model for HW satisfaction will depend on how it is distributed.

The outcomes have different levels of clustering (children or consultations, HW, HF). We will account for these levels of clustering by including random effects in the regression models.

Four of the primary outcomes are measured at baseline and end-line. The effect of the intervention will be estimated using an interaction term between arm and survey in the regression models: i.e. is the change in the outcome between baseline and follow-up in the intervention arm different to the change between baseline and follow-up in the control arm? The effect of HW satisfaction, measured only at end-line, will be estimated as the difference between the intervention and control arm.

All estimates for the effect of the intervention will be presented with 95% confidence intervals. The analyses will be carried out using R [31].

### Measures to minimise bias

Statistical analyses will be carried out blindly, without knowledge of what health facilities or population in the catchment area belong to the intervention or control groups. Only when the analysis code is considered as definitive and fixed, will results be shared with the wider investigators team and the arms for health facilities and population will be disclosed.

Outcome measurement bias may take place where data from the HIS, which is the focus of the intervention, is used to measure outcomes. However, we will minimise this by assessing population based outcomes at household level.

Contamination (i.e. the intervention affects individuals or units assigned to the control arm) may happen via the exchanges between health workers from health facilities in both arms; for example: in monthly district data quality meetings, managerial meetings; or through inputs from supervisors who influence control health facilities with intervention tips encountered in health facilities of the intervention arms. One mechanism to address this issue is using a district-based cluster randomisation scheme. However, we consider that (i) contamination, despite increasing the awareness of health works in control health facilities, will hardly influence the decision making mechanisms that the HIS intervention focuses on; and (ii) randomisation at the level of district poses additional challenges that are not worth the marginal benefit of reducing a doubtful contamination [32].

The spill-over effect (i.e. benefits of the intervention extend beyond their direct recipients) [33] may take place in higher levels of the health systems; e.g. district data managers and programme managers may experience the benefits of better structured and more timely data produced in health facilities in the intervention arms. The trial will have no capacity to quantitatively account for spill overs at higher levels of the system, due to the limited number of higher level administrative areas that will be involved in the trial. However, through process indicators, we will consider potential benefits and harms of the intervention at higher levels of the system.

1  
2  
3 A challenge is the Hawthorne effect (i.e. observer effect). Both health workers in the intervention  
4 and in the control sites will have an awareness of being observed as data collection activities will be  
5 at the same level of intensity in the two arms. Therefore, there should be no differential effect.  
6  
7

8  
9  
10 Analyses will be based on the intention-to-treat. It is important to closely monitor if the intervention  
11 HFs consistently use the new HIS tools and approaches. The data collection team and the trial  
12 monitoring team will check if old forms are still being used in the intervention health facilities.  
13  
14

15  
16 However, we do not expect health facilities to migrate between intervention and control arms, or  
17 vice versa, due to feasibility issues. On the other hand, some household members in a given  
18 catchment area may decide to seek for health care in a health facility belonging to another trial arm.  
19  
20  
21

22 In these cases, households will be analysed as belonging to the original trial arm.  
23  
24  
25

## 26 **Ethics and dissemination**

27  
28  
29 Ethics committees in Côte d'Ivoire, Mozambique and Nigeria approved the study in their respective  
30 countries. To date, some modifications to the protocol have taken place. In Côte d'Ivoire, we decided  
31 to select study areas close to the research institution base on logistics and practical reasons, instead  
32 of selecting an area in the north of the country, where poorer health indicators have been described.  
33  
34

35  
36 In Mozambique, the low density of HF per population implied extremely vast distances between HF  
37 and this, coupled with the rainy season, made the trial unfeasible in the originally selected Nampula  
38 province. After consultations, we decided to move the trial to the province of Inhambane and cancel  
39 the household survey. The allocation of HF to the intervention and control arms was completed using  
40 random number generation.  
41  
42  
43

44  
45 We plan to disseminate the findings of the trials as one of the few examples of studies assessing the  
46 effects of health information systems interventions using experimental study designs [34]. Most of  
47 the experimental studies on HIS are circumscribed to specific health care areas (e.g. tuberculosis,  
48 vaccination, cardiovascular disease) and very few have a system-wide approach (e.g. PHC) [34].  
49  
50  
51

52  
53  
54  
55  
56  
57  
58  
59  
60  
61  
62  
63  
64  
65  
66  
67  
68  
69  
70  
71  
72  
73  
74  
75  
76  
77  
78  
79  
80  
81  
82  
83  
84  
85  
86  
87  
88  
89  
90  
91  
92  
93  
94  
95  
96  
97  
98  
99  
100  
Experimental studies for health systems interventions are sometimes dismissed because of their



1  
2  
3 limited capacity to provide reliable explanations of complex health system issues [35]. While we  
4  
5 acknowledge these limitations, there is also a need for more robust evidence on the effects of these  
6  
7 types of health system interventions [36] and there are also good examples of experimental studies  
8  
9 reporting findings that can make it to the policy arena [37]. When embarking on this research, we  
10  
11 considered from the outset the type of evidence required to be disseminated and included into  
12  
13 systematic reviews [38], guidance development [39] and eventually recommendations for policy and  
14  
15 practice [40].  
16  
17  
18  
19  
20

21 We acknowledge the challenges of carrying out research on health care provided to remote, rural  
22  
23 communities (in this case in Sub-Saharan Africa). However, it is only in these remote areas where  
24  
25 research about their specific problems and needs can take place. Challenges included long distances,  
26  
27 poor conditions of roads, unreliable communications and limited food and accommodation services,  
28  
29 all of them to be proactively handled to keep the quality of work and the morale of researchers and  
30  
31 collaborators. We expect that the dissemination of findings in meetings, conferences and  
32  
33 publications will contribute to a better understanding of what it takes to make research in  
34  
35 challenging contexts.  
36  
37  
38

39 The engagement and ownership of partners within this research has also been instrumental in order  
40  
41 to plan and implement the CRCT. The intervention actually targets a governmental sub-system (the  
42  
43 HIS) for which we required more than permission but also endorsement and active support. We  
44  
45 achieved this level of collaboration by ensuring the participation of key stakeholders in key phases of  
46  
47 the whole project, from inception till the implementation of the last phases, through frequent  
48  
49 communication and workshops. The PHISICC programme includes targeted activities to keep  
50  
51 decision-makers engaged and we are planning to share the findings through workshops as well as  
52  
53 online and face-to-face events to disseminate the lessons learned from the trial and the whole  
54  
55 research.  
56  
57  
58  
59  
60

1  
2  
3 We also expect that the dissemination of our findings among partners and competitors will  
4  
5 contribute to the current debates on the digitalisation of health information systems. WHO  
6  
7 recommendations on the matter are weak since the underlying evidence to support these  
8  
9 recommendations is inconsistent [41]. The principles and methodological approaches in PHISICC can  
10  
11 be applied to the development of any technological solution, being on paper, digital or mixed.  
12  
13  
14 Finally, we expect that the results of the trials, both quantitative and qualitative, will be able to  
15  
16 inform policies on how to make HIS responsive to providers' decision-making needs, particularly in  
17  
18 health services where the most vulnerable live.  
19  
20  
21  
22  
23  
24  
25  
26  
27  
28  
29  
30  
31  
32  
33  
34  
35  
36  
37  
38  
39  
40  
41  
42  
43  
44  
45  
46  
47  
48  
49  
50  
51  
52  
53  
54  
55  
56  
57  
58  
59  
60

### Authors' contributions

XBC, AOI, AM, RBY and CAU prepared the proposal for the funding agency, conceived the study and produced the data collection tools. SG ensured the regulatory, ethical and trial monitoring components. AR developed the analytical approaches and made the sample size calculations. RBY, MS and SB adapted the protocol to the context of Côte d'Ivoire and managed the administrative and ethical approvals in the country; AOI, NE, ON, ANN and ABG likewise in Nigeria; AM, SML and GM, in Nampula province (Mozambique); JS and TM adapted the protocol and acquired ethical and administrative clearances for Inhambane province (Mozambique). DB is chair of the PHISICC Technical Advisory Group (TAG) and has coordinated multiple formal and informal inputs. LKK and DB have advised on the adequacy of the study protocol within the overall PHISICC proposal and TAG advices. All country teams participated in PHISICC workshops and ensured that the protocol was suitable to countries realities; developed data collection tools and training materials. They are responsible for the implementation of the trial in each country. XBC drafted the first version of the manuscript. All authors commented on several versions of the manuscript.

### Acknowledgements

Members of the PHISICC Technical Advisory Group, chaired by David Brown: Blanche Anya (WHO AFRO), Abdallah Bchir (former Gavi), Marta Gacic-Dobo (WHO HQ), Richard Greffé (AIGA), Pamela Mitula (WHO AFRO), Sandy Oliver (UCL Institute) and Chris Wolf (BMGF).

Research collaborators: Momade Ali, Celso Belo, Bassirou Bonfoh, Lisa Diallo, John Ferreira, Bernard Guessanbi, Caitlin Jarrett, Inza Koné, Felix Malé, Kouadio M'bra, David O'Donnell, Damaris Rodríguez (Sonder Collective), Melanie Wendland and Meike Zuske (Swiss TPH).

Stakeholders from Côte d'Ivoire, Mozambique and Nigeria, participating in the consultation processes.

## Data sharing statement

We report on a protocol of three Cluster Randomised Controlled Trials and therefore no data is available yet. On completion of the trials, access to data will be available from the national research institutions in Côte d'Ivoire, Mozambique and Nigeria, in publications and in the funding agency.

Individual participants' data on vaccination and antenatal care outcomes as well as health workers and users perceptions will be anonymised and made available via an online data repository for any purpose and access will be granted following a review of requests by the Swiss TPH contract officer. Data, with DOIs, will be made available during the second semester of 2021.

Available documents include study protocols, analytical plan, informed consent forms and analytical code.

## Ethical approvals in Côte d'Ivoire, Mozambique and Nigeria

- Comité National Ethique des Sciences de la Vie et de la Santé (CNESVS), reference: 024-19/MSHP/CNESVS-kp (Côte d'Ivoire)
- Comité Institucional de Bioética para Saúde da Universidade Lúrio, reference: 16.2/Julho/CBISUL/19 (Mozambique)
- Secretary, Government of Cross River State of Nigeria, Ministry of Health, Calabar Health Research Ethics Committee, reference: CRS/MH/HREC/018/Vol. V1/151 (Nigeria)
- Ethikkommission Nordwest- und Zentralschweiz (EKNZ), reference: 2018-01059 (Switzerland).

## Funding

Funded by the Bill & Melinda Gates Foundation, grant number INV-010193 / OPP1135947.

## Abbreviations

BMGF Bill & Melinda Gates Foundation

CRCT Cluster Randomised Controlled Trial

sd Standard deviation

HF Health Facility

HW Health worker

WHO World Health Organisation

## Additional files

- Additional file 1: CONSORT statement checklist.

## Competing interests

No, there are no competing interests for any author.

## References

- 1 WHO. Monitoring results with health facility information systems: A technical consultation Glion-sur-Montreux, Switzerland, 11–12 June 2014. WHO 2014.
- 2 WHO. Health facility & community data toolkit. WHO 2014.
- 3 Bosch-Capblanch X, Ronveaux O, Doyle V, Remedios V, Bchir A. Accuracy and quality of immunization information systems in forty-one low income countries. *Trop Med Int Health*. 2009 Jan;14(1):2-10. doi: 10.1111/j.1365-3156.2008.02181.x. PMID: 19152556.
- 4 Loder E. Promises, promises. *BMJ*. 2017 Mar 23;356:j1446. doi: 10.1136/bmj.j1446. PMID: 28336513.
- 5 Wenger N, Méan M, Castioni J, Marques-Vidal P, Waeber G, Garnier A. Allocation of Internal Medicine Resident Time in a Swiss Hospital: A Time and Motion Study of Day and Evening Shifts. *Ann Intern Med*. 2017 Apr 18;166(8):579-586. doi: 10.7326/M16-2238. Epub 2017 Jan 31. PMID: 28135724.
- 6 Bosch-Capblanch X, Zuske M, Auer C, Amadasoun S. Effects of interventions to improve ‘health information use systems’ on the quality and use of information. National Institute for Health Research. PROSPERO - [https://www.crd.york.ac.uk/prospero/display\\_record.php?RecordID=35218](https://www.crd.york.ac.uk/prospero/display_record.php?RecordID=35218).
- 7 Bosch-Capblanch X, Zuske M, Auer C. Making information support systems relevant to decision-makers: an effectiveness systematic review and a framework synthesis. Abstracts of the 25th Cochrane Colloquium, Edinburgh, UK. *Cochrane Database of Systematic Reviews* 2018;(9 Suppl 1). <https://doi.org/10.1002/14651858.CD201801>.
- 8 Schulz KF, Altman DG, Moher D, for the CONSORT Group. CONSORT 2010 Statement: updated guidelines for reporting parallel group randomised trials.
- 9 Campbell MK, Piaggio G, Elbourne DR, Altman DG; for the CONSORT Group. Consort 2010 statement: extension to cluster randomised trials. *BMJ*. 2012;345:e5661.
- 10 R Core Team. R: A Language and Environment for Statistical Computing [Internet]. Vienna, Austria; 2020. Available from: <https://www.R-project.org/>
- 11 Bostoen K, Chalabi Z. Optimization of household survey sampling without sample frames. *Int J Epidemiol*. 2006 Jun;35(3):751-5. doi: 10.1093/ije/dyl019. Epub 2006 Feb 15. PMID: 16481364.
- 12 Johnson, Sandhu, Tyler, “The Next Step for Human-Centered Design in Global Public Health” *Stanford Social Innovation Review*, Oct. 22, 2019.
- 13 WHO. Global Vaccine Action Plan 2011-2020. WHO 2013.

- 1  
2  
3  
4  
5  
6  
7  
8  
9  
10  
11  
12  
13  
14  
15  
16  
17  
18  
19  
20  
21  
22  
23  
24  
25  
26  
27  
28  
29  
30  
31  
32  
33  
34  
35  
36  
37  
38  
39  
40  
41  
42  
43  
44  
45  
46  
47  
48  
49  
50  
51  
52  
53  
54  
55  
56  
57  
58  
59  
60
- 14 Carroli G, Villar J, Piaggio G, Khan-Neelofur D, Gülmezoglu M, Mugford M, Lumbiganon P, Farnot U, Bergsjø P; WHO Antenatal Care Trial Research Group. WHO systematic review of randomised controlled trials of routine antenatal care. *Lancet*. 2001 May 19;357(9268):1565-70. doi: 10.1016/S0140-6736(00)04723-1. PMID: 11377643.
- 15 Alpern R, Canavan ME, Thompson JT, McNatt Z, Tatek D, Lindfield T, Bradley EH. Development of a brief instrument for assessing healthcare employee satisfaction in a low-income setting. *PLoS One*. 2013 Nov 5;8(11):e79053. doi: 10.1371/journal.pone.0079053. PMID: 24223878; PMCID: PMC3818514.
- 16 Doll WJ and Torkzadeh G. The measurement of end-user computing satisfaction. *MIS Quarterly* 1988;12(2):259–74; 19.
- 17 Ilias A, Yasoa MR, Razaka MZA and Rahmana RA. The study of end-user computing satisfaction (EUCS) on computerised accounting system (CAS) among Labuan F.T. Government sectors: a case study in the responsibility centres. *Labuan e-Journal of Muamalat and Society* 2007;1:1–13.
- 18 Arifeen SE, Hoque DM, Akter T, Rahman M, Hoque ME, Begum K, Chowdhury EK, Khan R, Blum LS, Ahmed S, Hossain MA, Siddik A, Begum N, Sadeq-ur Rahman Q, Haque TM, Billah SM, Islam M, Rumi RA, Law E, Al-Helal ZA, Baqui AH, Schellenberg J, Adam T, Moulton LH, Habicht JP, Scherpbier RW, Victora CG, Bryce J, Black RE. Effect of the Integrated Management of Childhood Illness strategy on childhood mortality and nutrition in a rural area in Bangladesh: a cluster randomised trial. *Lancet*. 2009 Aug 1;374(9687):393-403. doi: 10.1016/S0140-6736(09)60828-X. PubMed PMID: 19647607.
- 19 Tilahun H, Fekadu B, Abdisa H, Canavan M, Linnander E, Bradley EH, Berman P. Ethiopia's health extension workers use of work time on duty: time and motion study. *Health Policy Plan*. 2017 Apr 1;32(3):320-328. doi: 10.1093/heapol/czw129. PubMed PMID: 27658649.
- 20 Hayes RJ, Bennett S. Simple sample size calculation for cluster-randomized trials. *Int J Epidemiol*. 1999 Apr;28(2):319-26.
- 21 The DHS program. Demographic and Health surveys. <https://dhsprogram.com/>.
- 22 Thayaparan, A. a. (2013). The Patient Satisfaction Questionnaire Short Form (PSQ-18) as an adaptable, reliable, and validated tool for use in various settings. *Med Educ Online*, 18.
- 23 The Health Foundation. (2013, June). Measuring patient experience (no.18). Retrieved Nov 6, 2018, from [www.health.org.uk](http://www.health.org.uk): <https://www.health.org.uk/publication/measuring-patient-experience>.

- 1  
2  
3  
4  
5  
6  
7 24 Grogan, S. C. (2000). Validation of a questionnaire measuring patient satisfaction with general  
8 practitioner services. *Quality in Health Care*, 9, 210-215.
- 9  
10 25 LaVela, S. L. (2014). Evaluation and measurement of patient experience. *Patient Experience*  
11 *Journal*, 1(1), Article 5.
- 12  
13 26 Alpern, R. C. (2013, November). Development of a Brief Instrument for Assessing Healthcare  
14 Employee Satisfaction in a Low-Income Setting. *PLOS ONE*, 8(11), e79053.
- 15  
16 27 Chang, E. C. (2017). Measuring job satisfaction among healthcare staff in the United States: a  
17 confirmatory factor analysis of the Satisfaction of Employees in health Care (SEHC) survey.  
18 *International Journal for Quality in health Care*, 29(2), 262-268.
- 19  
20 28 Open Data Kit. <https://opendatakit.org/>. Accessed 5<sup>th</sup> February 2021.
- 21  
22 29 Pocock S, et al. Subgroup analysis, covariate adjustment and baseline comparisons in clinical trial  
23 reporting: current practice and problems. *Stat Med*. 2002;21:2917-30.
- 24  
25 30 The CONSORT Group. CONSORT Statement [Internet]; item 15.
- 26  
27 31 R Core Team. R: A language and environment for statistical computing. R Foundation for  
28 Statistical Computing, Vienna, Austria. URL <https://www.R-project.org/>.
- 29  
30 32 Torgerson David J. Contamination in trials: is cluster randomisation the answer? *BMJ* 2001;  
31 322:355.
- 32  
33 33 Benjamin-Chung J, Arnold BF, Berger D, Luby SP, Miguel E, Colford JM Jr, Hubbard AE. Spillover  
34 effects in epidemiology: parameters, study designs and methodological considerations. *Int J*  
35 *Epidemiol*. 2018 Feb 1;47(1):332-347. doi: 10.1093/ije/dyx201. PubMed PMID: 29106568; PubMed  
36 Central PMCID: PMC5837695.
- 37  
38 34 Leon N, Balakrishna Y, Hohlfeld A, Odendaal WA, Schmidt BM, Zweigenthal V, Anstey Watkins J,  
39 Daniels K. Routine Health Information System (RHIS) improvements for strengthened health system  
40 management. *Cochrane Database Syst Rev*. 2020 Aug 13;8:CD012012. doi:  
41 10.1002/14651858.CD012012.pub2. PMID: 32803893.
- 42  
43 35 Allanson ER, Tunçalp Ö, Vogel JP, Khan DN, Oladapo OT, Long Q, Gülmezoglu AM. Implementation  
44 of effective practices in health facilities: a systematic review of cluster randomised trials. *BMJ Glob*  
45 *Health*. 2017 Jul 20;2(2):e000266. doi: 10.1136/bmjgh-2016-000266. PMID: 29081997; PMCID:  
46 PMC5656132.
- 47  
48  
49  
50  
51  
52  
53  
54  
55  
56  
57  
58  
59  
60



1  
2  
3  
4  
5  
6  
7 36 Brown DW, Bosch-Capblanch X, Shimp L. Where Do We Go From Here? Defining an Agenda for  
8 Home-Based Records Research and Action Considering the 2018 WHO Guidelines. *Glob Health Sci*  
9 *Pract.* 2019 Mar 29;7(1):6-11. doi: 10.9745/GHSP-D-18-00431. PMID: 30877139; PMCID:  
10 PM6538131.  
11

12  
13  
14 37 Joos O, Silva R, Amouzou A, Moulton LH, Perin J, Bryce J, et al. Evaluation of a mhealth data  
15 quality intervention to improve documentation of pregnancy outcomes by health surveillance  
16 assistants in Malawi: a cluster randomized trial. *PLoS One* 2016;11(1):e0145238. PMID: 26731401.  
17 DOI: <https://doi.org/10.1371/journal.pone.0145238>  
18

19  
20  
21 38 Langlois EV, Ranson MK, Bärnighausen T, Bosch-Capblanch X, Daniels K, El-Jardali F, Ghaffar A,  
22 Grimshaw J, Haines A, Lavis JN, Lewin S, Meng Q, Oliver S, Pantoja T, Straus S, Shemilt I, Tovey D,  
23 Tugwell P, Waddington H, Wilson M, Yuan B, Røttingen JA. Advancing the field of health systems  
24 research synthesis. *Syst Rev.* 2015 Jul 10;4:90. doi: 10.1186/s13643-015-0080-9. PMID: 26159806;  
25 PMCID: PMC4498528.  
26

27  
28  
29 39 Bosch-Capblanch X, Lavis JN, Lewin S, Atun R, Røttingen JA, Dröschel D, Beck L, Abalos E, El-Jardali  
30 F, Gilson L, Oliver S, Wyss K, Tugwell P, Kulier R, Pang T, Haines A. Guidance for evidence-informed  
31 policies about health systems: rationale for and challenges of guidance development. *PLoS Med.*  
32 2012;9(3):e1001185. doi: 10.1371/journal.pmed.1001185. Epub 2012 Mar 6. PMID: 22412356;  
33 PMCID: PMC3295823.  
34

35  
36  
37 40 WHO. WHO recommendations on home-based records for maternal, newborn and child health.  
38 WHO 2018.  
39

40  
41  
42 41 WHO. Recommendations on digital interventions for health system strengthening. WHO  
43 guideline. WHO 2019.  
44  
45  
46  
47  
48  
49  
50  
51  
52  
53  
54  
55  
56  
57  
58  
59  
60

## Tables and Figures

**Table 1. Comparison of new (intervention) and current (control) tools.**

| Characteristics                     | New (PHISICC intervention) tools                                         | Old (control tools)                                           |
|-------------------------------------|--------------------------------------------------------------------------|---------------------------------------------------------------|
| Development approach                | Human Centred Design, co-creation with users                             | Centrally done, based on data and information experts         |
| Visual language                     | Standardised across tools                                                | No visual elements                                            |
| Information structure               | Following clinical processes                                             | Tabular form, following reporting requirements                |
| Decision aids                       | Icons representing mild, moderate and severe conditions                  | Not available                                                 |
| Register books layout               | Landscape, DIN-A3                                                        | Depending on health care area; often much larger than DIN-A3  |
| Tally sheets to aid counting events | For each health care area, to be filled as health care events take place | Only for vaccination, to be filled as vaccinations take place |
| Reporting                           | Integrated with tallying / counting                                      | Requires revisiting register books at the end of the month    |

**Table 2. Outcomes and parameters used to estimate the sample sizes.**

|   | <b>Outcome name</b>           | <b>Subjects</b>                                                    | <b>Definition</b>                                                                                                                                                                               | <b>Baseline estimate</b>                | <b>Expected change</b>         | <b>Comments</b>                                                                 |
|---|-------------------------------|--------------------------------------------------------------------|-------------------------------------------------------------------------------------------------------------------------------------------------------------------------------------------------|-----------------------------------------|--------------------------------|---------------------------------------------------------------------------------|
| 1 | Vaccination adherence         | Children under-1 in (sample of households in catchment areas)      | Number of vaccines given in the previous calendar year over the number of vaccine due in the same period                                                                                        | 75 given per 100 due                    | Increase of 10 per 100         | Vaccines are clustered within children, and children within HFs                 |
| 2 | Data concordance              | Recording tools in health facilities (samples of records)          | Number of health care events (e.g. vaccinations, antenatal care consultations) recounted in the previous calendar year versus the number of health care events reported in the same time period | 7 recounted for each 10 reported [3]    | Increase of 1 recounted        | A single estimate can be obtained in each HF or by time periods (no clustering) |
| 3 | Diagnostic scope              | Records of sick child consultations (samples of records)           | Number of diagnosis in each sick child consultation during the previous calendar year                                                                                                           | 30% with more than 1 diagnosis          | 35% with more than 1 diagnosis | Individual consultations are clustered within HF                                |
| 4 | Treatment appropriateness     | Records of sick child consultations (samples of records)           | Number of treatments correctly prescribed in each sick child consultation during the previous calendar year                                                                                     | Half appropriate over all consultations | Increase to 60%                | Individual consultations are clustered within HF (one treatment per child)      |
| 5 | Health workforce satisfaction | Health workers (all health workers form include health facilities) | Degree (score) of satisfaction across all health facilities in each arm, with the intervention                                                                                                  | 50% satisfied                           | 75% satisfied                  | Maybe two or three health workers can be approached in each health facility     |

### Figure 1. PHISICC research programme structure, processes, deliverables and flow of evidence.

Footnote to Figure 1. WS: work stream. Timelines are approximate.

1  
2  
3 **Figure 2. CONSORT diagram: trial flow chart.**  
4  
5

6 Separate file.  
7  
8  
9  
10  
11  
12  
13  
14  
15  
16  
17  
18  
19  
20  
21  
22  
23  
24  
25  
26  
27  
28  
29  
30  
31  
32  
33  
34  
35  
36  
37  
38  
39  
40  
41  
42  
43  
44  
45  
46  
47  
48  
49  
50  
51  
52  
53  
54  
55  
56  
57  
58  
59  
60

For peer review only

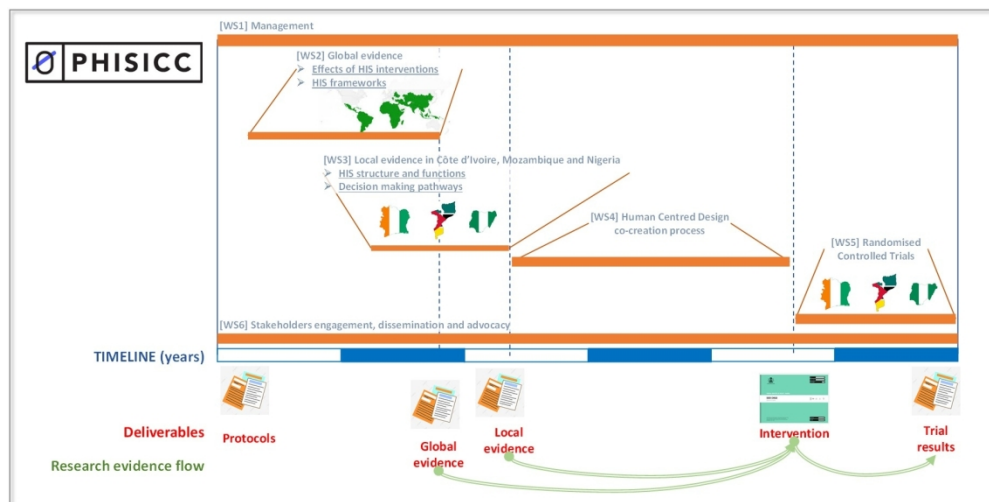

Figure 1. PHISICC research programme structure, processes, deliverables and flow of evidence.

312x157mm (150 x 150 DPI)



Figure 2. CONSORT diagram: trial flow chart.

144x150mm (150 x 150 DPI)

```
1
2
3 #
4 # clustersampleSize_proportions_baseline&endline.r
5 # get power of cluster randomised trial for binary outcomes (baseline and
6 # endline surveys)
7 # 2 groups (control & intervention)
8 # clustered within HF
9
10
11 rm(list=ls())
12
13 # if the package lme4 is not already installed (needed for regression with
14 # random effects)
15 # install.packages(lme4)
16 require(lme4)
17 #install.packages("reshape")
18 library(reshape)
19
20
21
22 # INPUTS
23 numGroups<-2
24 numHFPerGroup<-35
25 numTrialsToSimulate<-100
26 # numTrialsToSimulate: use 10 to test that the script runs, use 100 or 1000 for
27 # precise estimate of power
28
29
30
31
32 # choose input set and remove #s to run
33
34 # inputs for 'treatments with appropriate diagnosis'
35 pInterv<-0.60
36 pControl<-0.50
37 sdHFcluster<-0.55
38 # for k=0.1, 0.20; for k=0.25, 0.55
39 numObsPerHF<-25
40
41 # inputs for vaccination adherence
42 # proportions in interventions and control groups
43 # pInterv<-0.8
44 # pControl<-0.75
45 # sdHFcluster<-2.63
46 # numObsPerHF<-30
47
48
49
50 # inputs for 'more than one diagnosis'
51 # pInterv<-0.35
52 # pControl<-0.30
53 # sdHFcluster<-0.39
54 # for k=0.1, 0.16; for k=0.25, 0.39
55 # numObsPerHF<-60
56
57
58
59 # NB getsd is a function at the bottom of the script to turn k into sdHFcluster
60 (sdHFcluster is on the logit scale)
```

```

1
2
3
4
5
6 # --- simulation ----
7
8 # SET UP DATA STRUCTURE (intervention, HF)
9 totNumHF <- numHFPerGroup*numGroups
10 HFList<-seq(1:totNumHF)
11 interv<- rep(c(0,1),each=(totNumHF/2) )
12 intervEffect<-rep( c(0,(log(pInterv/(1-pInterv)) -
13 log(pControl/(1-pControl))) ), each=(totNumHF/2) )
14
15
16 xtemp<-cbind(interv,HFList,intervEffect)
17
18 # SET UP STORE FOR PVALUES AND PRECISION
19 storeResults<-array(-9,dim=c(numTrialsToSimulate,3))
20 colnames(storeResults)<-c("pvalue","coeff","stderr")
21
22
23 # LOOP THROUGH THE SIMULATIONS
24
25 for (i in 1:numTrialsToSimulate) {
26
27 # simulate the HF cluster effects
28 HFEffect<-rnorm(totNumHF,mean=0,sd=sdHFcluster)
29 xtemp2a<-cbind(xtemp, HFEffect)
30 xtemp2a<-data.frame(xtemp2a)
31
32
33 # get expected proportions (pre and post)
34 xtemp2a$expectedprelogodds<-log(pControl/(1-pControl)) + xtemp2a$HFEffect
35
36 xtemp2a$expectedpostlogodds<-log(pControl/(1-pControl)) +
37 xtemp2a$intervEffect + xtemp2a$HFEffect
38
39 xtemp2a$expectedpre<-exp(xtemp2a$expectedprelogodds)/(1+exp(xtemp2a$expectedpre
40 logodds))
41
42 xtemp2a$expectedpost<-exp(xtemp2a$expectedpostlogodds)/(1+exp(xtemp2a$expectedp
43 ostlogodds))
44
45 # expand by the number of observations per HF
46 xtemp2b<-untable(xtemp2a, num=numObsPerHF)
47 numObs<-dim(xtemp2b)[1]
48
49
50 # simulate individual observations from cluster mean rates
51 simObsPost<-rep(0,numObs)
52 simObsPre<-rep(0,numObs)
53 for (j in 1:numObs) {
54 simObsPost[j]<-rbinom(n=1, size=1,prob=xtemp2b$expectedpost[j])
55 simObsPre[j]<-rbinom(n=1, size=1,prob=xtemp2b$expectedpre[j])
56 }
57 # drop variables not needed further
58 xtemp2b$expectedpostlogodds<-NULL; xtemp2b$expectedprelogodds<-NULL
59
60

```



```
1
2
3
4 # stack pre and post observations
5 # get post
6 xtemp3<-cbind(xtemp2b,simObsPost)
7 xtemp3<-data.frame(xtemp3)
8 xtemp3$simObs<-xtemp3$simObsPost
9 xtemp3$simObsPost<-NULL
10 xtemp3$post<-1
11 # get pre
12 xtemp4<-cbind(xtemp2b,simObsPre)
13 xtemp4<-data.frame(xtemp4)
14 xtemp4$simObs<-xtemp4$simObsPre
15 xtemp4$simObsPre<-NULL
16 xtemp4$post<-0
17 xtemp4$interv<-0
18 xtemp5<-rbind(xtemp3,xtemp4)
19
20
21
22 # carry out analysis for individual trial
23 m <- glmer(simObs ~ as.factor(interv) + post + (1 | HFList),
24 data<-xtemp5, family=binomial)
25
26 # store result of individual trial in storeResults (p-value, coefficient
27 and std error)
28 out1<-summary(m)$coefficients
29 storeResults[i,2]<-out1[2,1]
30 storeResults[i,3]<-out1[2,2]
31 storeResults[i,1]<-out1[2,4]
32
33
34 print(i)
35
36 } # End of loop
37
38 # calculate power
39 pvalue<-storeResults[,1]
40 power<-length(pvalue[pvalue<0.05])/length(pvalue)
41
42 cat("power ", power, "\n")
43
44
45
46
47 # ----- run to here -----
48
49
50
51
52
53
54
55 # -----
56 # getsd: function to estimate between-cluster variation from k (Hayes and
57 Bennet sd/mean) and input base proportion (base0p)
58
59
60
```

```
1
2
3  getsd<-function(base0p,k){
4      sdcluster<-k*base0p
5      clusterEffect<-rnorm(1000,mean=0,sd=sdcluster)
6      expectedp<-base0p + clusterEffect
7      expectedp[expectedp>1]<-0.9999
8      expectedp[expectedp<0]<-0.0001
9      logitexpectedp<-log((expectedp)/(1-expectedp))
10     sdlog<-sd(logitexpectedp)
11     cat("estimated sdlog ", sdlog, "\n")
12 }
13
14
15 # example
16 getsd(0.30,0.25)
17
18 getsd(0.50, 0.25)
```

```
1
2
3 #
4 # clusterSampleSize_concordance.r
5 # get power of cluster randomised trial
6 # ratios (outcome is continuous)
7 # fixed to 2 groups
8 # records and reports clustered within HF
9 #
10
11
12 # if the package lme4 is not already installed (needed for regression with
13 random effects)
14 # install.packages(lme4)
15 # install.packages(lmerTest)
16 require(lme4)
17 require(lmerTest)
18
19
20
21 # EXAMPLE INPUTS
22 numGroups<-2
23 numHFPerGroup<-35
24 numReportedPerHF<-100
25 # assuming equal numbers of vaccinations per HF
26 numTrialsToSimulate<-100
27 # 100 or 1000 needed for precision of the power estimate, use 10 for test runs
28
29 ratioControl<-0.7
30 ratioInterv<-0.8
31 sdHFcluster<-0.25*0.8
32 # sdHFcluster is on the log scale, calculated using k=0.25
33
34
35
36
37 # --- run simulation from here ----
38
39 # SET UP DATA STRUCTURE (intervention, HF)
40 totNumHF<-numGroups*numHFPerGroup
41 HFList<-rep(seq(1:(numHFPerGroup*numGroups)),each=1)
42 interv<-c( rep(c(0,1),each=(totNumHF/2)))
43 intervEffect<-rep( c(0,(ratioInterv - ratioControl )), each=(totNumHF/2) )
44 xtemp<-cbind(interv,HFList,intervEffect)
45
46
47 # SET UP STORE FOR PVALUES AND PRECISION
48 storeResults<-array(-9,dim=c(numTrialsToSimulate,3))
49 colnames(storeResults)<-c("pvalue","coeff","stderr")
50
51
52 # LOOP THROUGH THE SIMULATIONS
53
54 for (i in 1:numTrialsToSimulate) {
55
56   # simulate the HF cluster effects
57
58   HFEffect<-rnorm(numHFPerGroup*numGroups,mean=0,sd=sdHFcluster)
59   xtemp2<-cbind(xtemp, HFEffect)
60
```

```

1
2
3
4     # get expected ratios (pre and post)
5     expectedpreratio<-ratioControl + HFEeffect
6     expectedpostratio<-ratioControl + intervEffect + HFEeffect
7     expectedpreratio[expectedpreratio<0.0001]<-0.0001
8     expectedpostratio[expectedpostratio<0.0001]<-0.0001
9
10    # simulate individual observations as poisson rate of number reported per
11    1 recorded
12    simObsPost<-rep(0,length(expectedpostratio))
13    simObsPre<-rep(0,length(expectedpreratio))
14    for (j in 1:length(expectedpostratio)) {
15        simObsPost[j]<-rpois(n=1,expectedpostratio[j]*numReportedPerHF)
16        simObsPre[j]<-rpois(n=1,expectedpreratio[j]*numReportedPerHF)
17    }
18
19
20
21    # stack pre and post observations
22    # post
23    xtemp3<-cbind(xtemp2,simObsPost)
24    xtemp3<-data.frame(xtemp3)
25    xtemp3$simObs<-xtemp3$simObsPost
26    xtemp3$simObsPost<-NULL
27    xtemp3$post<-1
28    # pre
29    xtemp4<-cbind(xtemp2,simObsPre)
30    xtemp4<-data.frame(xtemp4)
31    xtemp4$simObs<-xtemp4$simObsPre
32    xtemp4$simObsPre<-NULL
33    xtemp4$post<-0
34    xtemp4$interv<-0
35    # stack pre and post
36    xtemp5<-rbind(xtemp3,xtemp4)
37    xtemp5$distanceToOne<-abs(1-(xtemp5$simObs/numReportedPerHF))
38
39
40
41    # carry out analysis for individual trial
42    m <- lmer(distanceToOne ~ as.factor(interv) + post + (1|HFList),
43    data=xtemp5)
44
45    # store result of individual trial in storeResults (p-value, coefficient
46    and std error)
47    out1<-summary(m)$coefficients
48    # estimate
49    storeResults[i,2]<-out1[2,1]
50    # se
51    storeResults[i,3]<-out1[2,2]
52    # p-value
53    storeResults[i,1]<-out1[2,5]
54
55
56    print(i)
57
58    } # End of loop
59
60

```

```
1
2
3
4 # calculate power
5 pvalue<-storeResults[,1]
6 power<-length(pvalue[pvalue<0.05])/length(pvalue)
7
8 cat("power ", power, "\n")
9
10
11 # -----
12
13
14
15
16
17
18
19
20
21
22
23
24
25
26
27
28
29
30
31
32
33
34
35
36
37
38
39
40
41
42
43
44
45
46
47
48
49
50
51
52
53
54
55
56
57
58
59
60
```

**Table 1: CONSORT 2010 checklist of information to include when reporting a cluster randomised trial**

| Section/Topic                    | Item No | Standard Checklist item                                                                                                               | Extension for cluster designs                                                                                                                                                                                      | Page No *          |
|----------------------------------|---------|---------------------------------------------------------------------------------------------------------------------------------------|--------------------------------------------------------------------------------------------------------------------------------------------------------------------------------------------------------------------|--------------------|
| <b>Title and abstract</b>        |         |                                                                                                                                       |                                                                                                                                                                                                                    |                    |
|                                  | 1a      | Identification as a randomised trial in the title                                                                                     | Identification as a cluster randomised trial in the title                                                                                                                                                          | 1                  |
|                                  | 1b      | Structured summary of trial design, methods, results, and conclusions                                                                 | See table 2                                                                                                                                                                                                        | 5                  |
| <b>Introduction</b>              |         |                                                                                                                                       |                                                                                                                                                                                                                    |                    |
| <b>Background and objectives</b> | 2a      | Scientific background and explanation of rationale                                                                                    | Rationale for using a cluster design                                                                                                                                                                               | 4                  |
|                                  | 2b      | Specific objectives or hypotheses                                                                                                     | Whether objectives pertain to the cluster level, the individual participant level or both                                                                                                                          | 5                  |
| <b>Methods</b>                   |         |                                                                                                                                       |                                                                                                                                                                                                                    |                    |
| <b>Trial design</b>              | 3a      | Description of trial design (such as parallel, factorial) including allocation ratio                                                  | Definition of cluster and description of how the design features apply to the clusters                                                                                                                             | 6                  |
|                                  | 3b      | Important changes to methods after trial commencement (such as eligibility criteria), with reasons                                    |                                                                                                                                                                                                                    | Not applicable     |
| <b>Participants</b>              | 4a      | Eligibility criteria for participants                                                                                                 | Eligibility criteria for clusters                                                                                                                                                                                  | 6                  |
|                                  | 4b      | Settings and locations where the data were collected                                                                                  |                                                                                                                                                                                                                    | 6                  |
| <b>Interventions</b>             | 5       | The interventions for each group with sufficient details to allow replication, including how and when they were actually administered | Whether interventions pertain to the cluster level, the individual participant level or both                                                                                                                       | 8                  |
| <b>Outcomes</b>                  | 6a      | Completely defined pre-specified primary and secondary outcome measures, including how and when they were assessed                    | Whether outcome measures pertain to the cluster level, the individual participant level or both                                                                                                                    | 10 and Table 1     |
|                                  | 6b      | Any changes to trial outcomes after the trial commenced, with reasons                                                                 |                                                                                                                                                                                                                    | Not applicable     |
| <b>Sample size</b>               | 7a      | How sample size was determined                                                                                                        | Method of calculation, number of clusters(s) (and whether equal or unequal cluster sizes are assumed), cluster size, a coefficient of intracluster correlation (ICC or $k$ ), and an indication of its uncertainty | 12                 |
|                                  | 7b      | When applicable, explanation of any interim analyses and stopping guidelines                                                          |                                                                                                                                                                                                                    | Not yet applicable |

| Section/Topic                           | Item No | Standard Checklist item                                                                                                                                                                     | Extension for cluster designs                                                                                                                                                              | Page No *      |
|-----------------------------------------|---------|---------------------------------------------------------------------------------------------------------------------------------------------------------------------------------------------|--------------------------------------------------------------------------------------------------------------------------------------------------------------------------------------------|----------------|
| <b>Randomisation:</b>                   |         |                                                                                                                                                                                             |                                                                                                                                                                                            |                |
| <b>Sequence generation</b>              | 8a      | Method used to generate the random allocation sequence                                                                                                                                      |                                                                                                                                                                                            | 7, 8           |
|                                         | 8b      | Type of randomisation; details of any restriction (such as blocking and block size)                                                                                                         | Details of stratification or matching if used                                                                                                                                              | Not applicable |
| <b>Allocation concealment mechanism</b> | 9       | Mechanism used to implement the random allocation sequence (such as sequentially numbered containers), describing any steps taken to conceal the sequence until interventions were assigned | Specification that allocation was based on clusters rather than individuals and whether allocation concealment (if any) was at the cluster level, the individual participant level or both | 7              |
| <b>Implementation</b>                   | 10      | Who generated the random allocation sequence, who enrolled participants, and who assigned participants to interventions                                                                     | Replace by 10a, 10b and 10c                                                                                                                                                                | 7              |
|                                         | 10a     |                                                                                                                                                                                             | Who generated the random allocation sequence, who enrolled clusters, and who assigned clusters to interventions                                                                            | 7              |
|                                         | 10b     |                                                                                                                                                                                             | Mechanism by which individual participants were included in clusters for the purposes of the trial (such as complete enumeration, random sampling)                                         | 10             |
|                                         | 10c     |                                                                                                                                                                                             | From whom consent was sought (representatives of the cluster, or individual cluster members, or both), and whether consent was sought before or after randomisation                        | 8              |
|                                         |         |                                                                                                                                                                                             |                                                                                                                                                                                            |                |
| <b>Blinding</b>                         | 11a     | If done, who was blinded after assignment to interventions (for example, participants, care providers, those assessing outcomes) and how                                                    |                                                                                                                                                                                            | 8              |
|                                         | 11b     | If relevant, description of the similarity of interventions                                                                                                                                 |                                                                                                                                                                                            | Not applicable |
| <b>Statistical methods</b>              | 12a     | Statistical methods used to compare groups for primary and secondary outcomes                                                                                                               | How clustering was taken into account                                                                                                                                                      | 15             |
|                                         | 12b     | Methods for additional analyses, such as subgroup analyses and adjusted analyses                                                                                                            |                                                                                                                                                                                            | 15             |

| Section/Topic            | Item No | Standard Checklist item                                                                                          | Extension for cluster designs                                             | Page No *                                |
|--------------------------|---------|------------------------------------------------------------------------------------------------------------------|---------------------------------------------------------------------------|------------------------------------------|
| <b>Results</b>           |         |                                                                                                                  |                                                                           | Not yet applicable (protocol manuscript) |
| <b>Discussion</b>        |         |                                                                                                                  |                                                                           |                                          |
| <b>Limitations</b>       | 20      | Trial limitations, addressing sources of potential bias, imprecision, and, if relevant, multiplicity of analyses |                                                                           | 18                                       |
| <b>Generalisability</b>  | 21      | Generalisability (external validity, applicability) of the trial findings                                        | Generalisability to clusters and/or individual participants (as relevant) | 18,19                                    |
| <b>Interpretation</b>    | 22      | Interpretation consistent with results, balancing benefits and harms, and considering other relevant evidence    |                                                                           | Not yet applicable                       |
| <b>Other information</b> |         |                                                                                                                  |                                                                           |                                          |
| <b>Registration</b>      | 23      | Registration number and name of trial registry                                                                   |                                                                           | 1                                        |
| <b>Protocol</b>          | 24      | Where the full trial protocol can be accessed, if available                                                      |                                                                           | 1                                        |
| <b>Funding</b>           | 25      | Sources of funding and other support (such as supply of drugs), role of funders                                  |                                                                           | 20                                       |

\* Page numbers: as seen in the document "draft\_Proof\_hi.pdf" (which has 34 pages)



## CONSORT 2010 checklist of information to include when reporting a cluster randomised trial

| Section/Topic                    | Item No | Standard Checklist item                                                                                                               | Extension for cluster designs                                                                                                                                                                                      | Page No *          |
|----------------------------------|---------|---------------------------------------------------------------------------------------------------------------------------------------|--------------------------------------------------------------------------------------------------------------------------------------------------------------------------------------------------------------------|--------------------|
| <b>Title and abstract</b>        |         |                                                                                                                                       |                                                                                                                                                                                                                    |                    |
|                                  | 1a      | Identification as a randomised trial in the title                                                                                     | Identification as a cluster randomised trial in the title                                                                                                                                                          | 1                  |
|                                  | 1b      | Structured summary of trial design, methods, results, and conclusions                                                                 | See table 2                                                                                                                                                                                                        | 5                  |
| <b>Introduction</b>              |         |                                                                                                                                       |                                                                                                                                                                                                                    |                    |
| <b>Background and objectives</b> | 2a      | Scientific background and explanation of rationale                                                                                    | Rationale for using a cluster design                                                                                                                                                                               | 4                  |
|                                  | 2b      | Specific objectives or hypotheses                                                                                                     | Whether objectives pertain to the cluster level, the individual participant level or both                                                                                                                          | 5                  |
| <b>Methods</b>                   |         |                                                                                                                                       |                                                                                                                                                                                                                    |                    |
| <b>Trial design</b>              | 3a      | Description of trial design (such as parallel, factorial) including allocation ratio                                                  | Definition of cluster and description of how the design features apply to the clusters                                                                                                                             | 6                  |
|                                  | 3b      | Important changes to methods after trial commencement (such as eligibility criteria), with reasons                                    |                                                                                                                                                                                                                    | Not applicable     |
| <b>Participants</b>              | 4a      | Eligibility criteria for participants                                                                                                 | Eligibility criteria for clusters                                                                                                                                                                                  | 6                  |
|                                  | 4b      | Settings and locations where the data were collected                                                                                  |                                                                                                                                                                                                                    | 6                  |
| <b>Interventions</b>             | 5       | The interventions for each group with sufficient details to allow replication, including how and when they were actually administered | Whether interventions pertain to the cluster level, the individual participant level or both                                                                                                                       | 8                  |
| <b>Outcomes</b>                  | 6a      | Completely defined pre-specified primary and secondary outcome measures, including how and when they were assessed                    | Whether outcome measures pertain to the cluster level, the individual participant level or both                                                                                                                    | 10 and Table 1     |
|                                  | 6b      | Any changes to trial outcomes after the trial commenced, with reasons                                                                 |                                                                                                                                                                                                                    | Not applicable     |
| <b>Sample size</b>               | 7a      | How sample size was determined                                                                                                        | Method of calculation, number of clusters(s) (and whether equal or unequal cluster sizes are assumed), cluster size, a coefficient of intracluster correlation (ICC or $k$ ), and an indication of its uncertainty | 12                 |
|                                  | 7b      | When applicable, explanation of any interim analyses and stopping guidelines                                                          |                                                                                                                                                                                                                    | Not yet applicable |

| Section/Topic                           | Item No | Standard Checklist item                                                                                                                                                                     | Extension for cluster designs                                                                                                                                                              | Page No *      |
|-----------------------------------------|---------|---------------------------------------------------------------------------------------------------------------------------------------------------------------------------------------------|--------------------------------------------------------------------------------------------------------------------------------------------------------------------------------------------|----------------|
| <b>Randomisation:</b>                   |         |                                                                                                                                                                                             |                                                                                                                                                                                            |                |
| <b>Sequence generation</b>              | 8a      | Method used to generate the random allocation sequence                                                                                                                                      |                                                                                                                                                                                            | 7, 8           |
|                                         | 8b      | Type of randomisation; details of any restriction (such as blocking and block size)                                                                                                         | Details of stratification or matching if used                                                                                                                                              | Not applicable |
| <b>Allocation concealment mechanism</b> | 9       | Mechanism used to implement the random allocation sequence (such as sequentially numbered containers), describing any steps taken to conceal the sequence until interventions were assigned | Specification that allocation was based on clusters rather than individuals and whether allocation concealment (if any) was at the cluster level, the individual participant level or both | 7              |
| <b>Implementation</b>                   | 10      | Who generated the random allocation sequence, who enrolled participants, and who assigned participants to interventions                                                                     | Replace by 10a, 10b and 10c                                                                                                                                                                | 7              |
|                                         | 10a     |                                                                                                                                                                                             | Who generated the random allocation sequence, who enrolled clusters, and who assigned clusters to interventions                                                                            | 7              |
|                                         | 10b     |                                                                                                                                                                                             | Mechanism by which individual participants were included in clusters for the purposes of the trial (such as complete enumeration, random sampling)                                         | 10             |
|                                         | 10c     |                                                                                                                                                                                             | From whom consent was sought (representatives of the cluster, or individual cluster members, or both), and whether consent was sought before or after randomisation                        | 8              |
| <b>Blinding</b>                         | 11a     | If done, who was blinded after assignment to interventions (for example, participants, care providers, those assessing outcomes) and how                                                    |                                                                                                                                                                                            | 8              |
|                                         | 11b     | If relevant, description of the similarity of interventions                                                                                                                                 |                                                                                                                                                                                            | Not applicable |
| <b>Statistical methods</b>              | 12a     | Statistical methods used to compare groups for primary and secondary outcomes                                                                                                               | How clustering was taken into account                                                                                                                                                      | 15             |
|                                         | 12b     | Methods for additional analyses, such as subgroup analyses and adjusted analyses                                                                                                            |                                                                                                                                                                                            | 15             |

| Section/Topic            | Item No | Standard Checklist item                                                                                          | Extension for cluster designs                                             | Page No *                                |
|--------------------------|---------|------------------------------------------------------------------------------------------------------------------|---------------------------------------------------------------------------|------------------------------------------|
| <b>Results</b>           |         |                                                                                                                  |                                                                           | Not yet applicable (protocol manuscript) |
| <b>Discussion</b>        |         |                                                                                                                  |                                                                           |                                          |
| <b>Limitations</b>       | 20      | Trial limitations, addressing sources of potential bias, imprecision, and, if relevant, multiplicity of analyses |                                                                           | 18                                       |
| <b>Generalisability</b>  | 21      | Generalisability (external validity, applicability) of the trial findings                                        | Generalisability to clusters and/or individual participants (as relevant) | 18,19                                    |
| <b>Interpretation</b>    | 22      | Interpretation consistent with results, balancing benefits and harms, and considering other relevant evidence    |                                                                           | Not yet applicable                       |
| <b>Other information</b> |         |                                                                                                                  |                                                                           |                                          |
| <b>Registration</b>      | 23      | Registration number and name of trial registry                                                                   |                                                                           | 1                                        |
| <b>Protocol</b>          | 24      | Where the full trial protocol can be accessed, if available                                                      |                                                                           | 1                                        |
| <b>Funding</b>           | 25      | Sources of funding and other support (such as supply of drugs), role of funders                                  |                                                                           | 20                                       |
