# Supplementary material for: Does an innovative paper-based health information system (PHISICC) improve data quality and use in primary healthcare? Protocol of a multicountry, cluster randomised controlled trial in sub-Saharan African rural settings
Source: PubMed Central journal article supplement (PMC8323359; doi:10.1136/bmjopen-2021-051823), 2021-07-29
Supplement: bmjopen-2021-051823supp001.pdf [file bmjopen-2021-051823supp001.pdf]

### CONSORT 2010 checklist of information to include when reporting a cluster randomised trial

| Section/Topic                    | Item No | Standard Checklist item                                                                                                               | Extension for cluster designs                                                                                                                                                                                      | Page No *          |
|----------------------------------|---------|---------------------------------------------------------------------------------------------------------------------------------------|--------------------------------------------------------------------------------------------------------------------------------------------------------------------------------------------------------------------|--------------------|
| <b>Title and abstract</b>        |         |                                                                                                                                       |                                                                                                                                                                                                                    |                    |
|                                  | 1a      | Identification as a randomised trial in the title                                                                                     | Identification as a cluster randomised trial in the title                                                                                                                                                          | 1                  |
|                                  | 1b      | Structured summary of trial design, methods, results, and conclusions                                                                 | See table 2                                                                                                                                                                                                        | 5                  |
| <b>Introduction</b>              |         |                                                                                                                                       |                                                                                                                                                                                                                    |                    |
| <b>Background and objectives</b> | 2a      | Scientific background and explanation of rationale                                                                                    | Rationale for using a cluster design                                                                                                                                                                               | 4                  |
|                                  | 2b      | Specific objectives or hypotheses                                                                                                     | Whether objectives pertain to the cluster level, the individual participant level or both                                                                                                                          | 5                  |
| <b>Methods</b>                   |         |                                                                                                                                       |                                                                                                                                                                                                                    |                    |
| <b>Trial design</b>              | 3a      | Description of trial design (such as parallel, factorial) including allocation ratio                                                  | Definition of cluster and description of how the design features apply to the clusters                                                                                                                             | 6                  |
|                                  | 3b      | Important changes to methods after trial commencement (such as eligibility criteria), with reasons                                    |                                                                                                                                                                                                                    | Not applicable     |
| <b>Participants</b>              | 4a      | Eligibility criteria for participants                                                                                                 | Eligibility criteria for clusters                                                                                                                                                                                  | 6                  |
|                                  | 4b      | Settings and locations where the data were collected                                                                                  |                                                                                                                                                                                                                    | 6                  |
| <b>Interventions</b>             | 5       | The interventions for each group with sufficient details to allow replication, including how and when they were actually administered | Whether interventions pertain to the cluster level, the individual participant level or both                                                                                                                       | 8                  |
| <b>Outcomes</b>                  | 6a      | Completely defined pre-specified primary and secondary outcome measures, including how and when they were assessed                    | Whether outcome measures pertain to the cluster level, the individual participant level or both                                                                                                                    | 10 and Table 1     |
|                                  | 6b      | Any changes to trial outcomes after the trial commenced, with reasons                                                                 |                                                                                                                                                                                                                    | Not applicable     |
| <b>Sample size</b>               | 7a      | How sample size was determined                                                                                                        | Method of calculation, number of clusters(s) (and whether equal or unequal cluster sizes are assumed), cluster size, a coefficient of intracluster correlation (ICC or $k$ ), and an indication of its uncertainty | 12                 |
|                                  | 7b      | When applicable, explanation of any interim analyses and stopping guidelines                                                          |                                                                                                                                                                                                                    | Not yet applicable |

| Section/Topic                           | Item No | Standard Checklist item                                                                                                                                                                     | Extension for cluster designs                                                                                                                                                              | Page No *      |
|-----------------------------------------|---------|---------------------------------------------------------------------------------------------------------------------------------------------------------------------------------------------|--------------------------------------------------------------------------------------------------------------------------------------------------------------------------------------------|----------------|
| <b>Randomisation:</b>                   |         |                                                                                                                                                                                             |                                                                                                                                                                                            |                |
| <b>Sequence generation</b>              | 8a      | Method used to generate the random allocation sequence                                                                                                                                      |                                                                                                                                                                                            | 7, 8           |
|                                         | 8b      | Type of randomisation; details of any restriction (such as blocking and block size)                                                                                                         | Details of stratification or matching if used                                                                                                                                              | Not applicable |
| <b>Allocation concealment mechanism</b> | 9       | Mechanism used to implement the random allocation sequence (such as sequentially numbered containers), describing any steps taken to conceal the sequence until interventions were assigned | Specification that allocation was based on clusters rather than individuals and whether allocation concealment (if any) was at the cluster level, the individual participant level or both | 7              |
| <b>Implementation</b>                   | 10      | Who generated the random allocation sequence, who enrolled participants, and who assigned participants to interventions                                                                     | Replace by 10a, 10b and 10c                                                                                                                                                                | 7              |
|                                         | 10a     |                                                                                                                                                                                             | Who generated the random allocation sequence, who enrolled clusters, and who assigned clusters to interventions                                                                            | 7              |
|                                         | 10b     |                                                                                                                                                                                             | Mechanism by which individual participants were included in clusters for the purposes of the trial (such as complete enumeration, random sampling)                                         | 10             |
|                                         | 10c     |                                                                                                                                                                                             | From whom consent was sought (representatives of the cluster, or individual cluster members, or both), and whether consent was sought before or after randomisation                        | 8              |
| <b>Blinding</b>                         |         |                                                                                                                                                                                             |                                                                                                                                                                                            |                |
|                                         | 11a     | If done, who was blinded after assignment to interventions (for example, participants, care providers, those assessing outcomes) and how                                                    |                                                                                                                                                                                            | 8              |
|                                         | 11b     | If relevant, description of the similarity of interventions                                                                                                                                 |                                                                                                                                                                                            | Not applicable |
| <b>Statistical methods</b>              |         |                                                                                                                                                                                             |                                                                                                                                                                                            |                |
|                                         | 12a     | Statistical methods used to compare groups for primary and secondary outcomes                                                                                                               | How clustering was taken into account                                                                                                                                                      | 15             |
|                                         | 12b     | Methods for additional analyses, such as subgroup analyses and adjusted analyses                                                                                                            |                                                                                                                                                                                            | 15             |

| Section/Topic            | Item No | Standard Checklist item                                                                                          | Extension for cluster designs                                             | Page No *                                |
|--------------------------|---------|------------------------------------------------------------------------------------------------------------------|---------------------------------------------------------------------------|------------------------------------------|
| <b>Results</b>           |         |                                                                                                                  |                                                                           | Not yet applicable (protocol manuscript) |
| <b>Discussion</b>        |         |                                                                                                                  |                                                                           |                                          |
| <b>Limitations</b>       | 20      | Trial limitations, addressing sources of potential bias, imprecision, and, if relevant, multiplicity of analyses |                                                                           | 18                                       |
| <b>Generalisability</b>  | 21      | Generalisability (external validity, applicability) of the trial findings                                        | Generalisability to clusters and/or individual participants (as relevant) | 18,19                                    |
| <b>Interpretation</b>    | 22      | Interpretation consistent with results, balancing benefits and harms, and considering other relevant evidence    |                                                                           | Not yet applicable                       |
| <b>Other information</b> |         |                                                                                                                  |                                                                           |                                          |
| <b>Registration</b>      | 23      | Registration number and name of trial registry                                                                   |                                                                           | 1                                        |
| <b>Protocol</b>          | 24      | Where the full trial protocol can be accessed, if available                                                      |                                                                           | 1                                        |
| <b>Funding</b>           | 25      | Sources of funding and other support (such as supply of drugs), role of funders                                  |                                                                           | 20                                       |
