# Supplementary material for: Does an innovative paper-based health information system (PHISICC) improve data quality and use in primary healthcare? Protocol of a multicountry, cluster randomised controlled trial in sub-Saharan African rural settings
Source: PubMed Central journal article supplement (PMC8323359; doi:10.1136/bmjopen-2021-051823), 2021-07-29
Supplement: bmjopen-2021-051823supp002.pdf [file bmjopen-2021-051823supp002.pdf]

```
#
# clustersampleSize_proportions_baseline&endline.r
# get power of cluster randomised trial for binary outcomes (baseline and
# 2 groups (control & intervention)
# clustered within HF

rm(list=ls())

# if the package lme4 is not already installed (needed for regression with
# random effects)
# install.packages(lme4)
require(lme4)
#install.packages("reshape")
library(reshape)

# INPUTS
numGroups<-2
numHFPerGroup<-35
numTrialsToSimulate<-100
# numTrialsToSimulate: use 10 to test that the script runs, use 100 or 1000 for
# precise estimate of power

# choose input set and remove #s to run

# inputs for 'treatments with appropriate diagnosis'
pInterv<-0.60
pControl<-0.50
sdHFcluster<-0.55
# for k=0.1, 0.20; for k=0.25, 0.55
numObsPerHF<-25

# inputs for vaccination adherence
# proportions in interventions and control groups
# pInterv<-0.8
# pControl<-0.75
# sdHFcluster<-2.63
# numObsPerHF<-30

# inputs for 'more than one diagnosis'
# pInterv<-0.35
# pControl<-0.30
# sdHFcluster<-0.39
# for k=0.1, 0.16; for k=0.25, 0.39
# numObsPerHF<-60

# NB getsd is a function at the bottom of the script to turn k into sdHFcluster
# (sdHFcluster is on the logit scale)
```

```
# --- simulation ----

# SET UP DATA STRUCTURE (intervention, HF)
totNumHF <- numHFPerGroup*numGroups
HFList<-seq(1:totNumHF)
interv<- rep(c(0,1),each=(totNumHF/2) )
intervEffect<-rep( c(0,(log(pInterv/(1-pInterv)) -
log(pControl/(1-pControl)))) ), each=(totNumHF/2) )

xtemp<-cbind(interv,HFList,intervEffect)

# SET UP STORE FOR PVALUES AND PRECISION
storeResults<-array(-9,dim=c(numTrialsToSimulate,3))
colnames(storeResults)<-c("pvalue","coeff","stderr")

# LOOP THROUGH THE SIMULATIONS
for (i in 1:numTrialsToSimulate) {

  # simulate the HF cluster effects
  HFEffect<-rnorm(totNumHF,mean=0,sd=sdHFcluster)
  xtemp2a<-cbind(xtemp, HFEffect)
  xtemp2a<-data.frame(xtemp2a)

  # get expected proportions (pre and post)
  xtemp2a$expectedprelogodds<-log(pControl/(1-pControl)) + xtemp2a$HFEffect

  xtemp2a$expectedpostlogodds<-log(pControl/(1-pControl)) +
xtemp2a$intervEffect + xtemp2a$HFEffect

xtemp2a$expectedpre<-exp(xtemp2a$expectedprelogodds)/(1+exp(xtemp2a$expectedpre
logodds))

xtemp2a$expectedpost<-exp(xtemp2a$expectedpostlogodds)/(1+exp(xtemp2a$expectedp
ostlogodds))

  # expand by the number of observations per HF
  xtemp2b<-untable(xtemp2a, num=numObsPerHF)
  numObs<-dim(xtemp2b)[1]

  # simulate individual observations from cluster mean rates
  simObsPost<-rep(0,numObs)
  simObsPre<-rep(0,numObs)
  for (j in 1:numObs) {
    simObsPost[j]<-rbinom(n=1, size=1,prob=xtemp2b$expectedpost[j])
    simObsPre[j]<-rbinom(n=1, size=1,prob=xtemp2b$expectedpre[j])
  }
  # drop variables not needed further
  xtemp2b$expectedpostlogodds<-NULL; xtemp2b$expectedprelogodds<-NULL
```

```
# stack pre and post observations
# get post
xtemp3<-cbind(xtemp2b,simObsPost)
xtemp3<-data.frame(xtemp3)
xtemp3$simObs<-xtemp3$simObsPost
xtemp3$simObsPost<-NULL
xtemp3$post<-1
# get pre
xtemp4<-cbind(xtemp2b,simObsPre)
xtemp4<-data.frame(xtemp4)
xtemp4$simObs<-xtemp4$simObsPre
xtemp4$simObsPre<-NULL
xtemp4$post<-0
xtemp4$interv<-0
xtemp5<-rbind(xtemp3,xtemp4)

# carry out analysis for individual trial
m <- glmer(simObs ~ as.factor(interv) + post + (1 | HFList),
data<-xtemp5, family=binomial)

# store result of individual trial in storeResults (p-value, coefficient
and std error)
  out1<-summary(m)$coefficients
  storeResults[i,2]<-out1[2,1]
  storeResults[i,3]<-out1[2,2]
  storeResults[i,1]<-out1[2,4]

print(i)
} # End of loop

# calculate power
pvalue<-storeResults[,1]
power<-length(pvalue[pvalue<0.05])/length(pvalue)

cat("power ", power, "\n")

# ----- run to here -----

# -----
# getsd: function to estimate between-cluster variation from k (Hayes and
Bennet sd/mean) and input base proportion (base0p)
```

```
getsd<-function(base0p,k){
  sdcluster<-k*base0p
  clusterEffect<-rnorm(1000,mean=0,sd=sdcluster)
  expectedp<-base0p + clusterEffect
  expectedp[expectedp>1]<-0.9999
  expectedp[expectedp<0]<-0.0001
  logitexpectedp<-log((expectedp)/(1-expectedp))
  sdlog<-sd(logitexpectedp)
  cat("estimated sdlog ", sdlog, "\n")
}

# example
getsd(0.30,0.25)

getsd(0.50, 0.25)
```
