# Supplementary material for: Does an innovative paper-based health information system (PHISICC) improve data quality and use in primary healthcare? Protocol of a multicountry, cluster randomised controlled trial in sub-Saharan African rural settings
Source: PubMed Central journal article supplement (PMC8323359; doi:10.1136/bmjopen-2021-051823), 2021-07-29
Supplement: bmjopen-2021-051823supp003.pdf [file bmjopen-2021-051823supp003.pdf]

```
#
# clusterSampleSize_concordance.r
# get power of cluster randomised trial
# ratios (outcome is continuous)
# fixed to 2 groups
# records and reports clustered within HF
#

# if the package lme4 is not already installed (needed for regression with
random effects)
# install.packages(lme4)
# install.packages(lmerTest)
require(lme4)
require(lmerTest)

# EXAMPLE INPUTS
numGroups<-2
numHFPerGroup<-35
numReportedPerHF<-100
# assuming equal numbers of vaccinations per HF
numTrialsToSimulate<-100
# 100 or 1000 needed for precision of the power estimate, use 10 for test runs

ratioControl<-0.7
ratioInterv<-0.8
sdHFcluster<-0.25*0.8
# sdHFcluster is on the log scale, calculated using k=0.25

# --- run simulation from here ----

# SET UP DATA STRUCTURE (intervention, HF)
totNumHF<-numGroups*numHFPerGroup
HFList<-rep(seq(1:(numHFPerGroup*numGroups)),each=1)
interv<-c( rep(c(0,1),each=(totNumHF/2)))
intervEffect<-rep( c(0,(ratioInterv - ratioControl )), each=(totNumHF/2) )
xtemp<-cbind(interv,HFList,intervEffect)

# SET UP STORE FOR PVALUES AND PRECISION
storeResults<-array(-9,dim=c(numTrialsToSimulate,3))
colnames(storeResults)<-c("pvalue","coeff","stderr")

# LOOP THROUGH THE SIMULATIONS

for (i in 1:numTrialsToSimulate) {

  # simulate the HF cluster effects

  HFEffect<-rnorm(numHFPerGroup*numGroups,mean=0,sd=sdHFcluster)
  xtemp2<-cbind(xtemp, HFEffect)
```

```
# get expected ratios (pre and post)
expectedpreratio<-ratioControl + HFEfffect
expectedpostratio<-ratioControl + intervEffect + HFEfffect
expectedpreratio[expectedpreratio<0.0001]<-0.0001
expectedpostratio[expectedpostratio<0.0001]<-0.0001

# simulate individual observations as poisson rate of number reported per
1 recorded
simObsPost<-rep(0,length(expectedpostratio))
simObsPre<-rep(0,length(expectedpreratio))
for (j in 1:length(expectedpostratio)) {
  simObsPost[j]<-rpois(n=1,expectedpostratio[j]*numReportedPerHF)
  simObsPre[j]<-rpois(n=1,expectedpreratio[j]*numReportedPerHF)
}

# stack pre and post observations
# post
xtemp3<-cbind(xtemp2,simObsPost)
xtemp3<-data.frame(xtemp3)
xtemp3$simObs<-xtemp3$simObsPost
xtemp3$simObsPost<-NULL
xtemp3$post<-1
# pre
xtemp4<-cbind(xtemp2,simObsPre)
xtemp4<-data.frame(xtemp4)
xtemp4$simObs<-xtemp4$simObsPre
xtemp4$simObsPre<-NULL
xtemp4$post<-0
xtemp4$interv<-0
# stack pre and post
xtemp5<-rbind(xtemp3,xtemp4)
xtemp5$distanceToOne<-abs(1-(xtemp5$simObs/numReportedPerHF))

# carry out analysis for individual trial
m <- lmer(distanceToOne ~ as.factor(interv) + post + (1|HFList),
data=xtemp5)

# store result of individual trial in storeResults (p-value, coefficient
and std error)
out1<-summary(m)$coefficients
# estimate
storeResults[i,2]<-out1[2,1]
# se
storeResults[i,3]<-out1[2,2]
# p-value
storeResults[i,1]<-out1[2,5]

print(i)
} # End of loop
```

```
# calculate power
pvalue<-storeResults[,1]
power<-length(pvalue[pvalue<0.05])/length(pvalue)

cat("power ", power, "\n")

# -----
```
